# Supplementary material for: Water oxidation catalysis with ligand substituted Ru–bpp type complexes
Source: Royal Society of Chemistry journal article supplement (doi:10.1039/c6cy00197a), 2016-01-01
Supplement: c6cy00197a1.pdf [file c6cy00197a1.pdf]

## Supporting Information – DFT for,

### Water Oxidation Catalysis with Ligand Substituted Ru-bpp-type Complexes

Stephan Roeser,[a] Fernando Bozoglian,[a] Craig J. Richmond,[a] Aaron B. League,[c]

Mehmed Z. Ertem,[c] Laia Francàs,[a] Pere Miró,[c] Jordi Benet-Buchholz,[a]

Christopher J. Cramer\*[c] and Antoni Llobet\*[a],[b]

#### DFT Key

Min-1 = bisoxo

TS-1 = peroxy formation

Min-2 = peroxy

TS-2 = one-water-assisted WNA on a Ru center

Min-3 = Ru-OO\_Ru-OH<sub>2</sub>-OH<sub>2</sub>

TS-3 = two-water-assisted WNA on the second Ru center

A = first WNA on center with substituted terpyridine ligand

B = first WNA on center with unsubstituted terpyridine ligand

**NO<sub>2</sub>-Trpy Substituted Complex (22<sup>2+</sup>)**[IV,IV]<sup>+3</sup> pathway

|        | Low Spin     | (singlet)    |                  |                   | low-spin     | high-spin    |
|--------|--------------|--------------|------------------|-------------------|--------------|--------------|
|        | E            | G            | E <sub>sol</sub> | <S <sup>2</sup> > | single point | single point |
| Min-1  | -2748.788 55 | -2748.196 09 | -2749.883 36     | 2.01              | -2749.484 02 | -2749.484 04 |
| TS-1   | -2748.765 75 | -2748.172 29 | -2749.861 17     | 0.99              | -2749.461 46 | -2749.459 80 |
| Min-2  | -2748.774 93 | -2748.179 42 | -2749.870 66     | 0.58              | -2749.472 78 | -2749.465 86 |
| TS-2A  | -2901.602 58 | -2900.960 56 | -2902.772 28     | 0.58              | -2902.371 32 | -2902.365 19 |
| TS-2B  | -2901.603 11 | -2900.961 78 | -2902.774 03     | 0.56              | -2902.371 91 | -2902.365 11 |
| Min-3A | -2901.610 74 | -2900.967 18 | -2902.777 61     | 0.41              | -2902.378 27 | -2902.371 32 |
| Min-3B | -2901.611 14 | -2900.968 07 | -2902.778 68     | 0.47              | -2902.378 43 | -2902.372 44 |
| TS-3A  | -2977.993 72 | -2977.330 11 | -2979.208 77     | 1.00              | -2978.798 45 | -2978.809 89 |
| TS-3B  | -2977.991 62 | -2977.329 00 | -2979.205 35     | 1.01              | -2978.796 29 | -2978.807 92 |

|        | High spin    | (quintet/triplet) |                  |                   |
|--------|--------------|-------------------|------------------|-------------------|
|        | E            | G                 | E <sub>sol</sub> | <S <sup>2</sup> > |
| Min-1  | -2748.788 61 | -2748.197 27      | -2749.883 41     | 6.03              |
| TS-1   | -2748.764 44 | -2748.171 99      | -2749.860 69     | 2.01              |
| Min-2  | -2748.771 56 | -2748.178 20      | -2749.869 22     | 2.01              |
| TS-2A  | -2901.597 46 | -2900.956 46      | -2902.767 72     | 2.02              |
| TS-2B  | -2901.597 59 | -2900.957 03      | -2902.767 98     | 2.02              |
| Min-3A | -2901.607 29 | -2900.967 71      | -2902.773 73     | 2.02              |
| Min-3B | -2901.607 97 | -2900.967 13      | -2902.776 68     | 2.02              |
| TS-3A  | -2978.006 06 | -2977.344 41      | -2979.220 58     | 2.02              |
| TS-3B  | -2978.003 79 | -2977.342 12      | -2979.218 85     | 2.02              |

[IV,V]<sup>+4</sup> pathway

|        | Low Spin     | (doublet)    |                  |                   | low-spin     | high-spin    |
|--------|--------------|--------------|------------------|-------------------|--------------|--------------|
|        | E            | G            | E <sub>sol</sub> | <S <sup>2</sup> > | single point | single point |
| Min-1  | N/A          | N/A          | N/A              | N/A               |              | N/A          |
| TS-1   | -2748.266 41 | -2747.674 36 | -2749.656 73     | 0.79              |              | N/A          |
| Min-2  | -2748.277 97 | -2747.685 02 | -2749.671 86     | 0.98              | -2748.973 11 | -2748.960 87 |
| TS-2A  | -2901.123 02 | -2900.483 72 | -2902.584 50     | 0.81              | -2901.890 99 | -2901.868 65 |
| TS-2B  | -2901.122 81 | -2900.483 81 | -2902.587 28     | 0.79              | -2901.891 12 | -2901.867 88 |
| Min-3A | -2901.130 99 | -2900.491 84 | -2902.592 98     | 1.28              | -2901.895 64 | -2901.883 53 |
| Min-3B | -2901.131 06 | -2900.491 66 | -2902.592 98     | 1.32              | -2901.894 56 | -2901.884 57 |
| TS-3A  | -2977.537 41 | -2976.876 79 | -2979.039 26     | 1.67              | -2978.338 71 | -2978.337 21 |
| TS-3B  | -2977.533 13 | -2976.870 98 | -2979.040 05     | 1.72              | -2978.334 28 | -2978.333 82 |

|        | High Spin    | (quartet)    |                  |                   |
|--------|--------------|--------------|------------------|-------------------|
|        | E            | G            | E <sub>sol</sub> | <S <sup>2</sup> > |
| Min-1  | -2748.291 22 | -2747.699 90 | -2749.675 48     | 3.78              |
| TS-1   | -2748.268 52 | -2747.677 14 | -2749.659 22     | 3.77              |
| Min-2  | -2748.271 86 | -2747.680 75 | -2749.667 82     | 3.77              |
| TS-2A  | -2901.106 90 | -2900.468 87 | -2902.572 47     | 3.78              |
| TS-2B  | -2901.108 88 | -2900.471 34 | -2902.577 69     | 3.78              |
| Min-3A | -2901.129 15 | -2900.490 98 | -2902.590 73     | 3.77              |
| Min-3B | -2901.130 82 | -2900.492 35 | -2902.587 81     | 3.77              |
| TS-3A  | -2977.536 04 | -2976.875 85 | -2979.037 24     | 3.78              |
| TS-3B  | -2977.532 85 | -2976.871 49 | -2979.040 81     | 3.78              |

### CH<sub>3</sub>O-Trpy Substituted Complex (20<sup>2+</sup>)

[IV,IV]<sup>+3</sup> pathway

|        | Low Spin     | (singlet)    |                  |                   | low-spin        | high spin       |
|--------|--------------|--------------|------------------|-------------------|-----------------|-----------------|
|        | E            | G            | E <sub>sol</sub> | <S <sup>2</sup> > | single point    | single point    |
| Min-1  | -2658.839 91 | -2658.215 78 | -2659.888 72     | 2.01              | -2659.888<br>72 | -2659.888<br>74 |
| TS-1   |              |              |                  |                   |                 |                 |
| Min-2  | -2657.741 90 | -2657.117 97 | -2659.455 90     |                   |                 |                 |
| TS-2A  |              |              |                  |                   |                 |                 |
| TS-2B  |              |              |                  |                   |                 |                 |
| Min-3A |              |              |                  |                   |                 |                 |
| Min-3B |              |              |                  |                   |                 |                 |
| TS-3A  |              |              |                  |                   |                 |                 |
| TS-3B  |              |              |                  |                   |                 |                 |

|        | High spin    | (quintet/triplet) |                  |                   |
|--------|--------------|-------------------|------------------|-------------------|
|        | E            | G                 | E <sub>sol</sub> | <S <sup>2</sup> > |
| Min-1  | -2658.839 98 | -2658.216 99      | -2659.888 20     |                   |
| TS-1   | -2658.814 88 | -2658.191 22      | -2659.863 52     |                   |
| Min-2  | -2658.821 22 | -2658.196 25      | -2659.455 70     |                   |
| TS-2A  |              |                   |                  |                   |
| TS-2B  |              |                   |                  |                   |
| Min-3A |              |                   |                  |                   |
| Min-3B |              |                   |                  |                   |
| TS-3A  |              |                   |                  |                   |
| TS-3B  |              |                   |                  |                   |

[IV,V]<sup>+4</sup> pathway

|        | Low Spin     | (doublet)    |                  |                   | low-spin        | high spin       |
|--------|--------------|--------------|------------------|-------------------|-----------------|-----------------|
|        | E            | G            | E <sub>sol</sub> | <S <sup>2</sup> > | single point    | single point    |
| Min-1  | -2658.350 35 | -2657.726 74 | -2659.680 10     | 1.77              | -2659.014<br>26 | -2659.020<br>07 |
| TS-1   |              |              |                  |                   |                 |                 |
| Min-2  | -2658.341 79 | -2657.715 94 | -2659.677 40     | 0.81              | -2659.008<br>31 | -2658.993<br>43 |
| TS-2A  | -2811.184 01 | -2810.512 85 | -2812.591 20     |                   |                 |                 |
| TS-2B  | -2811.183 30 | -2810.512 91 | -2812.592 60     |                   |                 |                 |
| Min-3A | -2811.189 80 | -2810.518 45 | -2812.596 60     | 1.07              | -2811.926<br>15 | -2811.910<br>20 |
| Min-3B | -2811.191 32 | -2810.518 34 | -2812.596 10     |                   |                 |                 |
| TS-3A  | -2887.587 09 | -2886.891 89 | -2889.037 20     |                   |                 |                 |
| TS-3B  | -2887.589 90 | -2886.896 42 | -2889.039 70     |                   |                 |                 |

|        | High Spin    | (quartet)    |                  |                   |
|--------|--------------|--------------|------------------|-------------------|
|        | E            | G            | E <sub>sol</sub> | <S <sup>2</sup> > |
| Min-1  | -2658.356 49 | -2657.733 76 | -2659.685 70     |                   |
| TS-1   | -2658.332 91 | -2657.709 60 | -2659.668 10     |                   |
| Min-2  | -2658.334 08 | -2657.710 49 | -2659.670 70     |                   |
| TS-2A  |              |              |                  |                   |
| TS-2B  |              |              |                  |                   |
| Min-3A | -2811.188 34 | -2810.518 62 | -2812.595 30     |                   |
| Min-3B | -2811.188 46 | -2810.518 35 | -2812.593 80     |                   |
| TS-3A  | -2887.596 09 | -2886.904 54 | -2889.042 50     |                   |
| TS-3B  | -2887.589 14 | -2886.896 45 | -2889.039 80     |                   |

## DFT calculated structures and energies

Structures and electronic energies relevant to the pathway in main text figure 9 are reported here for complexes **15**<sup>3+</sup>, **20**<sup>3+</sup>, and **22**<sup>3+</sup>. Many of the structures for complex **15**<sup>3+</sup> have been previously reported<sup>[1]</sup> but are reproduced here for completeness. A key for structure identification can be found in the table below.

| Identifier | Structure                                             |
|------------|-------------------------------------------------------|
| Min-1      | Ru=O_Ru=O                                             |
| TS-1       | O-O bond formation                                    |
| Min-2      | Ru-OO-Ru                                              |
| TS-2       | one-water-assisted O displacement on first Ru center  |
| Min-3      | Ru-OO_Ru-OH <sub>2</sub> -OH <sub>2</sub>             |
| TS-3       | one-water-assisted O displacement on second Ru center |

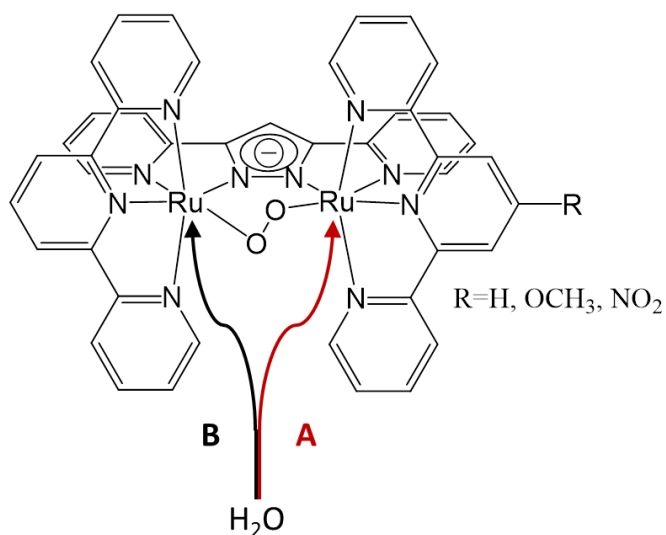

- |          |                                                         |
|----------|---------------------------------------------------------|
| <b>A</b> | first displacement occurs on Ru with substituted trpy   |
| <b>B</b> | first displacement occurs on Ru with unsubstituted trpy |

In the original version of this article's supporting information, a typographical error resulted in erroneous extra atoms being appended to the cartesian coordinates for **Min-1** and **TS-1** of complex **15<sup>3+</sup>**. Corrected versions of these structures were supplied in July 2016, and appear below.

## Structures for complex 15<sup>3+</sup>

### Min-1 (3+ quintet)

E= -2544.318 57 a.u.

|    |           |           |           |   |           |           |           |
|----|-----------|-----------|-----------|---|-----------|-----------|-----------|
| Ru | -2.196511 | 0.064405  | -0.233382 | C | -2.227736 | 4.191348  | -2.822793 |
| Ru | 2.196503  | -0.064412 | -0.233392 | H | -2.277619 | 5.085013  | -3.439885 |
| N  | -3.139809 | 0.970983  | 1.578841  | C | -3.226451 | 3.226159  | -2.909145 |
| O  | -1.211840 | -0.797540 | -1.411846 | H | -4.058941 | 3.361328  | -3.594761 |
| O  | 1.211802  | 0.797614  | -1.411772 | C | -3.150680 | 2.085732  | -2.115843 |
| C  | -4.388017 | 1.459366  | 1.680028  | C | -4.161343 | 1.019292  | -2.125071 |
| H  | -4.945288 | 1.543271  | 0.747139  | C | -5.336446 | 0.988057  | -2.874661 |
| N  | -0.633879 | 0.216028  | 1.202748  | H | -5.583919 | 1.795014  | -3.558954 |
| C  | -4.953183 | 1.842133  | 2.887230  | C | -6.196409 | -0.099039 | -2.734121 |
| H  | -5.964254 | 2.238246  | 2.913385  | H | -7.114846 | -0.138018 | -3.314446 |
| N  | 0.633875  | -0.216231 | 1.202722  | C | -5.893248 | -1.133475 | -1.850702 |
| C  | -4.196319 | 1.704225  | 4.049910  | H | -6.573466 | -1.973686 | -1.741193 |
| H  | -4.608594 | 1.988658  | 5.015073  | C | -4.709229 | -1.069037 | -1.118132 |
| N  | 3.139833  | -0.971132 | 1.578742  | C | -4.234796 | -2.049969 | -0.130241 |
| C  | -2.903393 | 1.206171  | 3.959732  | C | -4.932395 | -3.209441 | 0.199855  |
| H  | -2.285394 | 1.100190  | 4.848234  | H | -5.876112 | -3.437710 | -0.288795 |
| N  | -2.104088 | 1.904260  | -1.249638 | C | -4.416399 | -4.075280 | 1.158697  |
| C  | -2.390681 | 0.851612  | 2.711284  | H | -4.955598 | -4.981745 | 1.422624  |
| N  | -3.887577 | -0.005722 | -1.283845 | C | -3.206777 | -3.763813 | 1.771047  |
| C  | -1.039269 | 0.367019  | 2.497357  | H | -2.770624 | -4.413448 | 2.524780  |
| N  | -3.045970 | -1.754539 | 0.480278  | C | -2.553899 | -2.593704 | 1.401864  |
| C  | -0.000012 | -0.000238 | 3.354384  | H | -1.604301 | -2.301281 | 1.848119  |
| H  | -0.000015 | -0.000304 | 4.437547  | C | 1.144927  | -2.835682 | -1.172985 |
| N  | 2.104152  | -1.904174 | -1.249827 | H | 0.333761  | -2.615011 | -0.484506 |
| C  | 1.039267  | -0.367343 | 2.497316  | C | 1.171745  | -3.993670 | -1.941257 |
| N  | 3.887569  | 0.005877  | -1.283845 | H | 0.371485  | -4.722028 | -1.847533 |
| C  | 2.390697  | -0.851908 | 2.711195  | C | 2.227898  | -4.191113 | -2.823194 |
| N  | 3.045894  | 1.754495  | 0.480445  | H | 2.277820  | -5.084719 | -3.440367 |
| C  | 2.903418  | -1.206578 | 3.959608  | C | 3.226573  | -3.225876 | -2.909453 |
| H  | 2.285412  | -1.100712 | 4.848119  | H | 4.059071  | -3.360947 | -3.595078 |
| C  | 4.196363  | -1.704591 | 4.049739  | C | 3.150754  | -2.085526 | -2.116045 |
| H  | 4.608647  | -1.989107 | 5.014874  | C | 4.161377  | -1.019047 | -2.125168 |
| C  | 4.953237  | -1.842347 | 2.887047  | C | 5.336482  | -0.987699 | -2.874749 |
| H  | 5.964324  | -2.238423 | 2.913165  | H | 5.583988  | -1.794582 | -3.559117 |
| C  | 4.388060  | -1.459477 | 1.679883  | C | 6.196404  | 0.099416  | -2.734102 |
| H  | 4.945337  | -1.543266 | 0.746987  | H | 7.114843  | 0.138483  | -3.314419 |
| C  | -1.144823 | 2.835719  | -1.172710 | C | 5.893201  | 1.133757  | -1.850588 |
| H  | -0.333669 | 2.614949  | -0.484248 | H | 6.573387  | 1.973983  | -1.740997 |
| C  | -1.171592 | 3.993780  | -1.940874 | C | 4.709181  | 1.069206  | -1.118029 |
| H  | -0.371302 | 4.722096  | -1.847081 | C | 4.234708  | 2.050029  | -0.130048 |

|   |          |          |           |
|---|----------|----------|-----------|
| C | 4.932260 | 3.209500 | 0.200150  |
| H | 5.875966 | 3.437852 | -0.288481 |
| C | 4.416228 | 4.075233 | 1.159069  |
| H | 4.955388 | 4.981698 | 1.423075  |

|   |          |          |          |
|---|----------|----------|----------|
| C | 3.206619 | 3.763662 | 1.771391 |
| H | 2.770438 | 4.413214 | 2.525180 |
| C | 2.553788 | 2.593559 | 1.402104 |
| H | 1.604200 | 2.301062 | 1.848329 |

### Min-1 (4+ doublet)

E= -2543.824 18 a.u.

|    |           |           |           |
|----|-----------|-----------|-----------|
| Ru | -2.184908 | 0.073756  | -0.253701 |
| Ru | 2.184351  | -0.045451 | -0.213929 |
| N  | -3.125882 | 0.793756  | 1.627400  |
| O  | -1.142583 | -0.563393 | -1.470729 |
| C  | -4.366317 | 1.292654  | 1.769009  |
| H  | -4.925035 | 1.463498  | 0.849861  |
| N  | -0.610064 | 0.123097  | 1.204090  |
| C  | -4.929286 | 1.573042  | 3.007918  |
| H  | -5.937370 | 1.974874  | 3.065679  |
| N  | 0.657340  | -0.309189 | 1.169934  |
| C  | -4.183065 | 1.321148  | 4.159691  |
| H  | -4.598995 | 1.523050  | 5.144049  |
| N  | 3.158703  | -1.103590 | 1.492475  |
| C  | -2.894813 | 0.818097  | 4.029910  |
| H  | -2.281871 | 0.630426  | 4.908362  |
| N  | -2.181215 | 2.025017  | -1.033420 |
| C  | -2.380668 | 0.573082  | 2.754853  |
| N  | -3.900040 | 0.070927  | -1.265226 |
| C  | -1.028905 | 0.124427  | 2.503673  |
| N  | -2.991309 | -1.821856 | 0.305171  |
| C  | 0.009241  | -0.332136 | 3.330677  |
| H  | -0.003690 | -0.445141 | 4.408030  |
| N  | 2.156321  | -1.786042 | -1.407217 |
| C  | 1.053650  | -0.609444 | 2.458804  |
| N  | 3.876612  | 0.167660  | -1.292818 |
| C  | 2.407107  | -1.109145 | 2.630422  |
| N  | 3.032901  | 1.726145  | 0.630430  |
| C  | 2.911233  | -1.594495 | 3.835865  |
| H  | 2.292350  | -1.586905 | 4.730125  |
| C  | 4.207825  | -2.099193 | 3.876867  |
| H  | 4.617565  | -2.485055 | 4.807411  |
| C  | 4.967145  | -2.107396 | 2.709684  |
| H  | 5.980118  | -2.500366 | 2.697034  |
| C  | 4.407022  | -1.595898 | 1.544077  |
| H  | 4.971240  | -1.576879 | 0.612477  |
| C  | -1.258481 | 2.978735  | -0.842888 |
| H  | -0.434299 | 2.712205  | -0.186461 |
| C  | -1.338747 | 4.218975  | -1.465675 |
| H  | -0.569221 | 4.964156  | -1.285388 |
| C  | -2.407740 | 4.478210  | -2.317213 |
| H  | -2.497741 | 5.438075  | -2.820378 |
| C  | -3.367761 | 3.489947  | -2.519883 |
| H  | -4.209654 | 3.675854  | -3.181915 |

|   |           |           |           |
|---|-----------|-----------|-----------|
| C | -3.242325 | 2.266031  | -1.870744 |
| C | -4.210066 | 1.172055  | -1.996511 |
| C | -5.383427 | 1.175075  | -2.749286 |
| H | -5.660412 | 2.038034  | -3.348935 |
| C | -6.204919 | 0.049489  | -2.723463 |
| H | -7.121386 | 0.037771  | -3.309153 |
| C | -5.868620 | -1.059116 | -1.945262 |
| H | -6.522504 | -1.926822 | -1.923840 |
| C | -4.688461 | -1.031872 | -1.206163 |
| C | -4.180874 | -2.089532 | -0.321692 |
| C | -4.844269 | -3.292743 | -0.097488 |
| H | -5.787207 | -3.500054 | -0.597148 |
| C | -4.296523 | -4.231965 | 0.772888  |
| H | -4.811050 | -5.172589 | 0.955755  |
| C | -3.087862 | -3.948278 | 1.401956  |
| H | -2.628533 | -4.655009 | 2.087739  |
| C | -2.467106 | -2.732734 | 1.140388  |
| H | -1.519129 | -2.464723 | 1.604164  |
| C | 1.239291  | -2.764138 | -1.373754 |
| H | 0.443271  | -2.640652 | -0.643961 |
| C | 1.294620  | -3.859865 | -2.225913 |
| H | 0.534200  | -4.632918 | -2.161904 |
| C | 2.331405  | -3.942282 | -3.149685 |
| H | 2.402551  | -4.785568 | -3.832603 |
| C | 3.285252  | -2.929044 | -3.188200 |
| H | 4.104336  | -2.978431 | -3.901056 |
| C | 3.186455  | -1.855817 | -2.308108 |
| C | 4.152905  | -0.755368 | -2.245749 |
| C | 5.292114  | -0.604002 | -3.034744 |
| H | 5.535259  | -1.327822 | -3.807943 |
| C | 6.120966  | 0.495198  | -2.820246 |
| H | 7.011611  | 0.627864  | -3.430058 |
| C | 5.817892  | 1.422963  | -1.825870 |
| H | 6.471088  | 2.275303  | -1.660184 |
| C | 4.668456  | 1.241061  | -1.058546 |
| C | 4.201192  | 2.108196  | 0.028607  |
| C | 4.879737  | 3.246726  | 0.456273  |
| H | 5.808564  | 3.543137  | -0.024255 |
| C | 4.366727  | 4.004150  | 1.504786  |
| H | 4.892655  | 4.892505  | 1.846769  |
| C | 3.176283  | 3.606300  | 2.105834  |
| H | 2.742747  | 4.168406  | 2.928569  |
| C | 2.539765  | 2.462817  | 1.638497  |



|   |          |          |          |   |          |          |           |
|---|----------|----------|----------|---|----------|----------|-----------|
| H | 1.606179 | 2.112325 | 2.075536 | O | 1.178705 | 0.902279 | -1.315261 |
|---|----------|----------|----------|---|----------|----------|-----------|

### Min-1 (4+ quartet)

E= -2543.827 18 a.u.

|    |           |           |           |   |           |           |           |
|----|-----------|-----------|-----------|---|-----------|-----------|-----------|
| Ru | -2.170209 | 0.048482  | -0.252538 | C | -4.140750 | 0.999489  | -2.147809 |
| Ru | 2.170195  | -0.047950 | -0.252581 | C | -5.274453 | 0.931617  | -2.956638 |
| N  | -3.161757 | 0.875733  | 1.562505  | H | -5.538071 | 1.750047  | -3.621300 |
| O  | -1.089617 | -0.659497 | -1.393849 | C | -6.075448 | -0.207801 | -2.898953 |
| C  | -4.427309 | 1.327953  | 1.648159  | H | -6.960544 | -0.276467 | -3.527334 |
| H  | -4.980653 | 1.388573  | 0.711781  | C | -5.761692 | -1.254764 | -2.031318 |
| N  | -0.636383 | 0.210436  | 1.211383  | H | -6.403404 | -2.130430 | -1.981277 |
| C  | -5.012968 | 1.699779  | 2.849077  | C | -4.620399 | -1.154327 | -1.238310 |
| H  | -6.036786 | 2.063179  | 2.864499  | C | -4.150195 | -2.128984 | -0.244453 |
| N  | 0.636351  | -0.212452 | 1.211037  | C | -4.819105 | -3.312141 | 0.056200  |
| C  | -4.262631 | 1.593931  | 4.019651  | H | -5.731223 | -3.575161 | -0.473519 |
| H  | -4.692672 | 1.871816  | 4.979223  | C | -4.320736 | -4.155061 | 1.046446  |
| N  | 3.161783  | -0.878123 | 1.561105  | H | -4.842223 | -5.077684 | 1.291053  |
| C  | -2.951703 | 1.135843  | 3.944519  | C | -3.155776 | -3.797077 | 1.719316  |
| H  | -2.340281 | 1.057560  | 4.840396  | H | -2.739417 | -4.425599 | 2.501873  |
| N  | -2.190903 | 1.958096  | -1.120929 | C | -2.524715 | -2.607417 | 1.377459  |
| C  | -2.417829 | 0.788196  | 2.705273  | H | -1.612310 | -2.279511 | 1.873271  |
| N  | -3.846533 | -0.045889 | -1.336063 | C | 1.321193  | -2.955491 | -0.913080 |
| C  | -1.047989 | 0.345193  | 2.503276  | H | 0.539342  | -2.751814 | -0.185408 |
| N  | -2.999744 | -1.792595 | 0.421951  | C | 1.407044  | -4.164718 | -1.591230 |
| C  | -0.000089 | -0.003002 | 3.359710  | H | 0.684026  | -4.950151 | -1.390292 |
| H  | -0.000108 | -0.004015 | 4.443036  | C | 2.425630  | -4.343722 | -2.522898 |
| N  | 2.191076  | -1.956218 | -1.123725 | H | 2.518976  | -5.278126 | -3.071415 |
| C  | 1.047870  | -0.349607 | 2.502687  | C | 3.333545  | -3.311260 | -2.742050 |
| N  | 3.846379  | 0.048200  | -1.336181 | H | 4.139511  | -3.437663 | -3.460457 |
| C  | 2.417726  | -0.792889 | 2.703966  | C | 3.208119  | -2.121439 | -2.031838 |
| N  | 2.999826  | 1.791967  | 0.424894  | C | 4.140602  | -0.995903 | -2.149567 |
| C  | 2.951528  | -1.142902 | 3.942582  | C | 5.274264  | -0.926721 | -2.958350 |
| H  | 2.340010  | -1.066451 | 4.838553  | H | 5.537878  | -1.744111 | -3.624295 |
| C  | 4.262515  | -1.600940 | 4.016946  | C | 6.075223  | 0.212637  | -2.898910 |
| H  | 4.692497  | -1.880646 | 4.976015  | H | 6.960285  | 0.282318  | -3.527229 |
| C  | 5.013004  | -1.704353 | 2.846251  | C | 5.761497  | 1.258201  | -2.029584 |
| H  | 6.036889  | -2.067592 | 2.861079  | H | 6.403227  | 2.133774  | -1.978161 |
| C  | 4.427406  | -1.330283 | 1.646000  | C | 4.620243  | 1.156475  | -1.236677 |
| H  | 4.980865  | -1.388962 | 0.709564  | C | 4.150165  | 2.129472  | -0.241140 |
| C  | -1.320827 | 2.956944  | -0.909104 | C | 4.819140  | 3.312109  | 0.061401  |
| H  | -0.538740 | 2.752072  | -0.182022 | H | 5.731165  | 3.576021  | -0.468031 |
| C  | -1.406740 | 4.167177  | -1.585460 | C | 4.320975  | 4.153344  | 1.053175  |
| H  | -0.683554 | 4.952220  | -1.383613 | H | 4.842519  | 5.075540  | 1.299262  |
| C  | -2.425607 | 4.347691  | -2.516531 | C | 3.156138  | 3.794231  | 1.725656  |
| H  | -2.519017 | 5.282923  | -3.063622 | H | 2.739923  | 4.421420  | 2.509358  |
| C  | -3.333687 | 3.315650  | -2.736942 | C | 2.524986  | 2.605168  | 1.381887  |
| H  | -4.139847 | 3.443202  | -3.454927 | H | 1.612647  | 2.276455  | 1.877285  |
| C  | -3.208159 | 2.124767  | -2.028523 | O | 1.089495  | 0.661923  | -1.392596 |

**Min-1 (4+ sextet)****E= -2543.818 67 a.u.**

|    |           |           |           |   |           |           |           |
|----|-----------|-----------|-----------|---|-----------|-----------|-----------|
| Ru | -2.194806 | 0.076790  | -0.218517 | C | -4.170403 | 1.021942  | -2.130211 |
| Ru | 2.194986  | -0.076039 | -0.218604 | C | -5.326760 | 0.973056  | -2.907531 |
| N  | -3.150853 | 0.964901  | 1.611383  | H | -5.570555 | 1.777857  | -3.595818 |
| O  | -1.214538 | -0.758700 | -1.421318 | C | -6.170719 | -0.129726 | -2.794625 |
| C  | -4.387961 | 1.462164  | 1.733644  | H | -7.073865 | -0.183040 | -3.398115 |
| H  | -4.961956 | 1.559655  | 0.812884  | C | -5.866103 | -1.164068 | -1.911421 |
| N  | -0.636198 | 0.193437  | 1.188583  | H | -6.529685 | -2.020414 | -1.826941 |
| C  | -4.934241 | 1.842846  | 2.960544  | C | -4.701122 | -1.082689 | -1.150377 |
| H  | -5.941694 | 2.248560  | 3.001181  | C | -4.228398 | -2.070179 | -0.172459 |
| N  | 0.636267  | -0.196131 | 1.188147  | C | -4.916112 | -3.241390 | 0.136776  |
| C  | -4.169317 | 1.688687  | 4.111985  | H | -5.856364 | -3.470515 | -0.358173 |
| H  | -4.566504 | 1.968475  | 5.084916  | C | -4.396608 | -4.119116 | 1.083452  |
| N  | 3.150687  | -0.969083 | 1.609071  | H | -4.929318 | -5.034216 | 1.331513  |
| C  | -2.879234 | 1.175764  | 3.998050  | C | -3.190021 | -3.807262 | 1.703142  |
| H  | -2.252938 | 1.056368  | 4.879227  | H | -2.750154 | -4.465467 | 2.447508  |
| N  | -2.135930 | 1.924836  | -1.232493 | C | -2.546046 | -2.626476 | 1.355085  |
| C  | -2.391017 | 0.829352  | 2.736580  | H | -1.598106 | -2.341702 | 1.809003  |
| N  | -3.896129 | -0.001017 | -1.284470 | C | 1.184362  | -2.862842 | -1.147808 |
| C  | -1.046513 | 0.343575  | 2.505372  | H | 0.375273  | -2.651805 | -0.454002 |
| N  | -3.044554 | -1.772229 | 0.447655  | C | 1.220499  | -4.026405 | -1.906439 |
| C  | -0.000106 | -0.004233 | 3.357015  | H | 0.431077  | -4.764816 | -1.799558 |
| H  | -0.000182 | -0.005710 | 4.440088  | C | 2.273413  | -4.219053 | -2.794310 |
| N  | 2.135620  | -1.921482 | -1.237162 | H | 2.329962  | -5.117464 | -3.404373 |
| C  | 1.046408  | -0.349773 | 2.504564  | C | 3.260447  | -3.242359 | -2.894673 |
| N  | 3.896022  | 0.004234  | -1.284804 | H | 4.089591  | -3.374824 | -3.584895 |
| C  | 2.390847  | -0.836274 | 2.734592  | C | 3.178488  | -2.096845 | -2.109526 |
| N  | 3.045330  | 1.771025  | 0.452308  | C | 4.169749  | -1.016453 | -2.133478 |
| C  | 2.878983  | -1.185969 | 3.995190  | C | 5.325711  | -0.965571 | -2.911254 |
| H  | 2.252686  | -1.068714 | 4.876654  | H | 5.569054  | -1.768517 | -3.601868 |
| C  | 4.168988  | -1.699369 | 4.107843  | C | 6.169849  | 0.136814  | -2.795761 |
| H  | 4.566118  | -1.981683 | 5.080068  | H | 7.072690  | 0.191676  | -3.399567 |
| C  | 4.933912  | -1.850722 | 2.956029  | C | 5.865776  | 1.168788  | -1.909611 |
| H  | 5.941302  | -2.256691 | 2.995660  | H | 6.529477  | 2.024847  | -1.823167 |
| C  | 4.387719  | -1.466837 | 1.730083  | C | 4.701167  | 1.085467  | -1.148208 |
| H  | 4.961703  | -1.562076 | 0.809081  | C | 4.229025  | 2.070384  | -0.167411 |
| C  | -1.184578 | 2.865932  | -1.141386 | C | 4.917158  | 3.240546  | 0.144819  |
| H  | -0.375053 | 2.653128  | -0.448630 | H | 5.857287  | 3.470799  | -0.349838 |
| C  | -1.221125 | 4.031369  | -1.897138 | C | 4.398262  | 4.115759  | 1.094148  |
| H  | -0.431599 | 4.769472  | -1.788899 | H | 4.931312  | 5.030021  | 1.344550  |
| C  | -2.274550 | 4.226253  | -2.783911 | C | 3.191846  | 3.802493  | 1.713448  |
| H  | -2.331429 | 5.126180  | -3.391705 | H | 2.752442  | 4.458728  | 2.459824  |
| C  | -3.261632 | 3.249808  | -2.886151 | C | 2.547414  | 2.622855  | 1.362336  |
| H  | -4.091123 | 3.383968  | -3.575626 | H | 1.599540  | 2.337102  | 1.815777  |
| C  | -3.179231 | 2.102351  | -2.103903 | O | 1.214776  | 0.762798  | -1.419124 |

**TS-1 (3+ unrestricted singlet)****E= -2544.295 13 a.u.**

|    |           |           |           |   |           |           |           |
|----|-----------|-----------|-----------|---|-----------|-----------|-----------|
| Ru | 0.045254  | 2.001124  | -0.090063 | C | 2.334447  | 2.895064  | -1.681805 |
| N  | 0.390727  | 3.207255  | 1.718492  | C | 1.186567  | 3.684495  | -2.153265 |
| O  | -0.531850 | 0.671779  | -1.225031 | C | 1.189721  | 4.634396  | -3.171506 |
| O  | 0.531850  | -0.671779 | -1.225031 | H | 2.098687  | 4.861720  | -3.721799 |
| C  | 0.580298  | 4.538678  | 1.745050  | C | 0.000000  | 5.291698  | -3.484054 |
| H  | 0.604198  | 5.035985  | 0.775933  | H | -0.013815 | 6.032132  | -4.279814 |
| Ru | -0.045254 | -2.001124 | -0.090063 | C | -1.168767 | 5.008840  | -2.782634 |
| N  | 0.085151  | 0.657039  | 1.479428  | H | -2.091686 | 5.526509  | -3.029502 |
| C  | 0.741943  | 5.253993  | 2.921874  | C | -1.131251 | 4.055018  | -1.765048 |
| H  | 0.897408  | 6.328430  | 2.886210  | C | -2.242583 | 3.656630  | -0.892882 |
| N  | -0.085151 | -0.657039 | 1.479428  | C | -3.507591 | 4.240745  | -0.938320 |
| C  | 0.698926  | 4.565089  | 4.133034  | H | -3.727779 | 5.006333  | -1.677895 |
| H  | 0.819210  | 5.094487  | 5.075099  | C | -4.480549 | 3.853892  | -0.024236 |
| N  | -0.390727 | -3.207255 | 1.718492  | H | -5.467319 | 4.309483  | -0.049513 |
| C  | 0.501705  | 3.190868  | 4.122439  | C | -4.164572 | 2.890958  | 0.930290  |
| H  | 0.466787  | 2.626094  | 5.051069  | H | -4.888265 | 2.576879  | 1.677695  |
| N  | 2.072022  | 2.018120  | -0.662801 | C | -2.891060 | 2.336940  | 0.923369  |
| C  | 0.350274  | 2.525947  | 2.905560  | H | -2.588335 | 1.587227  | 1.653709  |
| N  | 0.035734  | 3.426545  | -1.487054 | C | -3.070809 | -1.278402 | -0.162497 |
| C  | 0.149149  | 1.096198  | 2.766341  | H | -2.790635 | -0.609749 | 0.648382  |
| N  | -1.951593 | 2.690451  | 0.033684  | C | -4.372078 | -1.357346 | -0.639545 |
| C  | 0.000000  | 0.000000  | 3.625089  | H | -5.151387 | -0.743617 | -0.196003 |
| H  | 0.000000  | 0.000000  | 4.708128  | C | -4.650586 | -2.240014 | -1.678644 |
| N  | -2.072022 | -2.018120 | -0.662801 | H | -5.658494 | -2.331771 | -2.075774 |
| C  | -0.149149 | -1.096198 | 2.766341  | C | -3.620401 | -3.015075 | -2.201372 |
| N  | -0.035734 | -3.426545 | -1.487054 | H | -3.819866 | -3.714289 | -3.009233 |
| C  | -0.350274 | -2.525947 | 2.905560  | C | -2.334447 | -2.895064 | -1.681805 |
| N  | 1.951593  | -2.690451 | 0.033684  | C | -1.186567 | -3.684495 | -2.153265 |
| C  | -0.501705 | -3.190868 | 4.122439  | C | -1.189721 | -4.634396 | -3.171506 |
| H  | -0.466787 | -2.626094 | 5.051069  | H | -2.098687 | -4.861720 | -3.721799 |
| C  | -0.698926 | -4.565089 | 4.133034  | C | 0.000000  | -5.291698 | -3.484054 |
| H  | -0.819210 | -5.094487 | 5.075099  | H | 0.013815  | -6.032132 | -4.279814 |
| C  | -0.741943 | -5.253993 | 2.921874  | C | 1.168767  | -5.008840 | -2.782634 |
| H  | -0.897408 | -6.328430 | 2.886210  | H | 2.091686  | -5.526509 | -3.029502 |
| C  | -0.580298 | -4.538678 | 1.745050  | C | 1.131251  | -4.055018 | -1.765048 |
| H  | -0.604198 | -5.035985 | 0.775933  | C | 2.242583  | -3.656630 | -0.892882 |
| C  | 3.070809  | 1.278402  | -0.162497 | C | 3.507591  | -4.240745 | -0.938320 |
| H  | 2.790635  | 0.609749  | 0.648382  | H | 3.727779  | -5.006333 | -1.677895 |
| C  | 4.372078  | 1.357346  | -0.639545 | C | 4.480549  | -3.853892 | -0.024236 |
| H  | 5.151387  | 0.743617  | -0.196003 | H | 5.467319  | -4.309483 | -0.049513 |
| C  | 4.650586  | 2.240014  | -1.678644 | C | 4.164572  | -2.890958 | 0.930290  |
| H  | 5.658494  | 2.331771  | -2.075774 | H | 4.888265  | -2.576879 | 1.677695  |
| C  | 3.620401  | 3.015075  | -2.201372 | C | 2.891060  | -2.336940 | 0.923369  |
| H  | 3.819866  | 3.714289  | -3.009233 | H | 2.588335  | -1.587227 | 1.653709  |

### TS-1 (4+ quartet)

E= -2543.804 00 a.u.

|    |          |          |           |   |           |           |           |
|----|----------|----------|-----------|---|-----------|-----------|-----------|
| Ru | 0.000000 | 0.000000 | 0.000000  | O | 0.997572  | 1.436771  | -2.293917 |
| N  | 0.000000 | 0.000000 | 2.179172  | C | -1.018678 | -0.400052 | 2.962355  |
| O  | 0.559145 | 0.000000 | -1.781205 | H | -1.920052 | -0.730411 | 2.448481  |

|    |           |           |           |   |           |           |           |
|----|-----------|-----------|-----------|---|-----------|-----------|-----------|
| Ru | 2.843368  | 1.706508  | -2.219003 | H | -4.946204 | -0.040488 | -1.095754 |
| N  | 1.790268  | 0.845361  | 0.534207  | C | -4.149152 | -2.041812 | -1.023818 |
| C  | -0.942485 | -0.402485 | 4.348700  | H | -5.095394 | -2.506545 | -1.291333 |
| H  | -1.794695 | -0.735617 | 4.934880  | C | -3.031017 | -2.838898 | -0.783792 |
| N  | 2.805489  | 1.228523  | -0.225221 | H | -3.106958 | -3.920161 | -0.861823 |
| C  | 0.237962  | 0.019404  | 4.959383  | C | -1.825652 | -2.225191 | -0.445163 |
| H  | 0.329595  | 0.024178  | 6.043025  | C | -0.558728 | -2.893020 | -0.124121 |
| N  | 4.855292  | 2.128294  | -1.495781 | C | -0.409732 | -4.275956 | -0.048038 |
| C  | 1.297785  | 0.436882  | 4.163385  | H | -1.250071 | -4.929204 | -0.269102 |
| H  | 2.228605  | 0.776982  | 4.611271  | C | 0.813564  | -4.819529 | 0.332774  |
| N  | -1.277464 | 1.668345  | -0.052000 | H | 0.934255  | -5.897991 | 0.404550  |
| C  | 1.161678  | 0.426483  | 2.775463  | C | 1.868279  | -3.962984 | 0.636878  |
| N  | -1.770938 | -0.873776 | -0.358656 | H | 2.832426  | -4.346626 | 0.960155  |
| C  | 2.182805  | 0.862715  | 1.843729  | C | 1.666342  | -2.592007 | 0.537396  |
| N  | 0.493640  | -2.060727 | 0.156646  | H | 2.455804  | -1.880058 | 0.774776  |
| C  | 3.513954  | 1.291883  | 1.908799  | C | 3.774661  | -1.244084 | -2.462694 |
| H  | 4.126707  | 1.420343  | 2.792754  | H | 3.682241  | -1.220627 | -1.379078 |
| N  | 3.479097  | -0.096372 | -3.092768 | C | 4.178450  | -2.384743 | -3.143398 |
| C  | 3.875519  | 1.517785  | 0.575152  | H | 4.416739  | -3.290039 | -2.591599 |
| N  | 3.032554  | 2.248682  | -4.142176 | C | 4.282840  | -2.335622 | -4.530786 |
| C  | 5.044828  | 1.985083  | -0.142816 | H | 4.600383  | -3.208839 | -5.096004 |
| N  | 2.533791  | 3.805823  | -2.110121 | C | 3.991010  | -1.144330 | -5.190394 |
| C  | 6.278625  | 2.261875  | 0.445480  | H | 4.083777  | -1.084370 | -6.271788 |
| H  | 6.402665  | 2.142919  | 1.519332  | C | 3.596358  | -0.028739 | -4.458232 |
| C  | 7.339062  | 2.679481  | -0.349632 | C | 3.327305  | 1.287421  | -5.051993 |
| H  | 8.307188  | 2.896878  | 0.095530  | C | 3.374736  | 1.618565  | -6.404123 |
| C  | 7.143612  | 2.812923  | -1.723813 | H | 3.606947  | 0.870139  | -7.157088 |
| H  | 7.946908  | 3.135804  | -2.380555 | C | 3.117901  | 2.936035  | -6.784697 |
| C  | 5.891423  | 2.532004  | -2.253787 | H | 3.149217  | 3.208960  | -7.837050 |
| H  | 5.697165  | 2.632672  | -3.320468 | C | 2.830023  | 3.907178  | -5.826996 |
| C  | -0.956141 | 2.945384  | 0.207846  | H | 2.640247  | 4.932735  | -6.132287 |
| H  | 0.080728  | 3.119923  | 0.486689  | C | 2.791065  | 3.538000  | -4.482972 |
| C  | -1.883010 | 3.976382  | 0.133954  | C | 2.541763  | 4.419166  | -3.335996 |
| H  | -1.580811 | 4.994987  | 0.361864  | C | 2.372819  | 5.797920  | -3.440856 |
| C  | -3.194910 | 3.674115  | -0.220605 | H | 2.383603  | 6.277258  | -4.416504 |
| H  | -3.948225 | 4.455976  | -0.284030 | C | 2.211078  | 6.564041  | -2.290272 |
| C  | -3.538997 | 2.349508  | -0.478369 | H | 2.089199  | 7.642253  | -2.363763 |
| H  | -4.562748 | 2.094374  | -0.740009 | C | 2.227060  | 5.931959  | -1.049793 |
| C  | -2.571272 | 1.354058  | -0.383817 | H | 2.126953  | 6.496741  | -0.126609 |
| C  | -2.846012 | -0.076104 | -0.574530 | C | 2.391856  | 4.553196  | -1.003890 |
| C  | -4.067014 | -0.653279 | -0.915390 | H | 2.422328  | 4.013140  | -0.058438 |

### Min-2 (3+ unrestricted singlet)

E= -2544.303 90 a.u.

|    |           |           |           |    |           |           |           |
|----|-----------|-----------|-----------|----|-----------|-----------|-----------|
| Ru | 0.000000  | 2.006922  | -0.055967 | Ru | 0.000000  | -2.006922 | -0.055967 |
| N  | 0.179038  | 3.210806  | 1.721424  | N  | 0.046800  | 0.660417  | 1.505284  |
| O  | -0.491565 | 0.488437  | -1.172456 | C  | 0.359399  | 5.293935  | 2.897233  |
| O  | 0.491565  | -0.488437 | -1.172456 | H  | 0.428703  | 6.376751  | 2.846546  |
| C  | 0.263534  | 4.554025  | 1.728716  | N  | -0.046800 | -0.660417 | 1.505284  |
| H  | 0.253847  | 5.037328  | 0.752801  | C  | 0.361291  | 4.620688  | 4.118019  |

|   |           |           |           |   |           |           |           |
|---|-----------|-----------|-----------|---|-----------|-----------|-----------|
| H | 0.432546  | 5.170817  | 5.053093  | C | -1.290321 | 4.765877  | -2.970331 |
| N | -0.179038 | -3.210806 | 1.721424  | H | -2.238945 | 5.179366  | -3.302009 |
| C | 0.269910  | 3.235632  | 4.125612  | C | -1.234529 | 3.870826  | -1.901469 |
| H | 0.269404  | 2.682042  | 5.061573  | C | -2.358433 | 3.407741  | -1.083202 |
| N | 2.054802  | 2.192485  | -0.501230 | C | -3.668295 | 3.860012  | -1.235232 |
| C | 0.180131  | 2.542557  | 2.918472  | H | -3.911986 | 4.564561  | -2.026358 |
| N | -0.037085 | 3.368197  | -1.511949 | C | -4.655981 | 3.422588  | -0.361202 |
| C | 0.080287  | 1.102655  | 2.793060  | H | -5.678187 | 3.776744  | -0.468227 |
| N | -2.034292 | 2.518611  | -0.091350 | C | -4.309715 | 2.542297  | 0.660723  |
| C | 0.000000  | 0.000000  | 3.652918  | H | -5.045882 | 2.195794  | 1.381264  |
| H | 0.000000  | 0.000000  | 4.735948  | C | -2.991957 | 2.116943  | 0.759392  |
| N | -2.054802 | -2.192485 | -0.501230 | H | -2.665366 | 1.437136  | 1.545268  |
| C | -0.080287 | -1.102655 | 2.793060  | C | -3.083076 | -1.583575 | 0.107356  |
| N | 0.037085  | -3.368197 | -1.511949 | H | -2.812263 | -0.928139 | 0.932910  |
| C | -0.180131 | -2.542557 | 2.918472  | C | -4.402958 | -1.778071 | -0.276217 |
| N | 2.034292  | -2.518611 | -0.091350 | H | -5.203128 | -1.269738 | 0.254991  |
| C | -0.269910 | -3.235632 | 4.125612  | C | -4.671824 | -2.643473 | -1.332489 |
| H | -0.269404 | -2.682042 | 5.061573  | H | -5.693458 | -2.825386 | -1.656744 |
| C | -0.361291 | -4.620688 | 4.118019  | C | -3.612623 | -3.286852 | -1.964240 |
| H | -0.432546 | -5.170817 | 5.053093  | H | -3.802872 | -3.973915 | -2.784721 |
| C | -0.359399 | -5.293935 | 2.897233  | C | -2.308684 | -3.054522 | -1.535148 |
| H | -0.428703 | -6.376751 | 2.846546  | C | -1.127424 | -3.705669 | -2.119733 |
| C | -0.263534 | -4.554025 | 1.728716  | C | -1.112079 | -4.600724 | -3.185696 |
| H | -0.253847 | -5.037328 | 0.752801  | H | -2.032534 | -4.886895 | -3.687380 |
| C | 3.083076  | 1.583575  | 0.107356  | C | 0.108369  | -5.126366 | -3.610117 |
| H | 2.812263  | 0.928139  | 0.932910  | H | 0.135407  | -5.823247 | -4.443839 |
| C | 4.402958  | 1.778071  | -0.276217 | C | 1.290321  | -4.765877 | -2.970331 |
| H | 5.203128  | 1.269738  | 0.254991  | H | 2.238945  | -5.179366 | -3.302009 |
| C | 4.671824  | 2.643473  | -1.332489 | C | 1.234529  | -3.870826 | -1.901469 |
| H | 5.693458  | 2.825386  | -1.656744 | C | 2.358433  | -3.407741 | -1.083202 |
| C | 3.612623  | 3.286852  | -1.964240 | C | 3.668295  | -3.860012 | -1.235232 |
| H | 3.802872  | 3.973915  | -2.784721 | H | 3.911986  | -4.564561 | -2.026358 |
| C | 2.308684  | 3.054522  | -1.535148 | C | 4.655981  | -3.422588 | -0.361202 |
| C | 1.127424  | 3.705669  | -2.119733 | H | 5.678187  | -3.776744 | -0.468227 |
| C | 1.112079  | 4.600724  | -3.185696 | C | 4.309715  | -2.542297 | 0.660723  |
| H | 2.032534  | 4.886895  | -3.687380 | H | 5.045882  | -2.195794 | 1.381264  |
| C | -0.108369 | 5.126366  | -3.610117 | C | 2.991957  | -2.116943 | 0.759392  |
| H | -0.135407 | 5.823247  | -4.443839 | H | 2.665366  | -1.437136 | 1.545268  |

### Min-2 (4+ doublet)

E= -2543.812 87 a.u.

|    |           |           |           |   |           |           |           |
|----|-----------|-----------|-----------|---|-----------|-----------|-----------|
| Ru | 0.000000  | 2.026830  | -0.063230 | H | 0.076031  | 6.385394  | 2.845448  |
| N  | 0.042129  | 3.216874  | 1.705282  | N | -0.006216 | -0.662999 | 1.473348  |
| O  | -0.459834 | 0.501201  | -1.193381 | C | 0.075867  | 4.625096  | 4.112185  |
| O  | 0.459834  | -0.501201 | -1.193381 | H | 0.090514  | 5.176241  | 5.049563  |
| C  | 0.044926  | 4.562691  | 1.715181  | N | -0.042129 | -3.216874 | 1.705282  |
| H  | 0.037930  | 5.051587  | 0.742720  | C | 0.063689  | 3.235477  | 4.114460  |
| Ru | 0.000000  | -2.026830 | -0.063230 | H | 0.066554  | 2.680791  | 5.049888  |
| N  | 0.006216  | 0.662999  | 1.473348  | N | 2.070972  | 2.333058  | -0.317959 |
| C  | 0.065912  | 5.299723  | 2.892131  | C | 0.045281  | 2.544869  | 2.902865  |

|   |           |           |           |   |           |           |           |
|---|-----------|-----------|-----------|---|-----------|-----------|-----------|
| N | 0.045393  | 3.393293  | -1.540914 | C | -2.298483 | 3.420236  | -1.270915 |
| C | 0.016643  | 1.104469  | 2.769438  | C | -3.598671 | 3.861595  | -1.509754 |
| N | -2.030022 | 2.562732  | -0.235727 | H | -3.800954 | 4.543151  | -2.332172 |
| C | 0.000000  | 0.000000  | 3.627694  | C | -4.632275 | 3.445979  | -0.677507 |
| H | 0.000000  | 0.000000  | 4.710895  | H | -5.647894 | 3.794365  | -0.849987 |
| N | -2.070972 | -2.333058 | -0.317959 | C | -4.341827 | 2.596238  | 0.387303  |
| C | -0.016643 | -1.104469 | 2.769438  | H | -5.117355 | 2.266389  | 1.073540  |
| N | -0.045393 | -3.393293 | -1.540914 | C | -3.030800 | 2.177814  | 0.573245  |
| C | -0.045281 | -2.544869 | 2.902865  | H | -2.750513 | 1.518444  | 1.392739  |
| N | 2.030022  | -2.562732 | -0.235727 | C | -3.056522 | -1.810797 | 0.433509  |
| C | -0.063689 | -3.235477 | 4.114460  | H | -2.735282 | -1.186652 | 1.265520  |
| H | -0.066554 | -2.680791 | 5.049888  | C | -4.397706 | -2.056609 | 0.176506  |
| C | -0.075867 | -4.625096 | 4.112185  | H | -5.161092 | -1.625232 | 0.818500  |
| H | -0.090514 | -5.176241 | 5.049563  | C | -4.735212 | -2.880440 | -0.894847 |
| C | -0.065912 | -5.299723 | 2.892131  | H | -5.776031 | -3.103091 | -1.118433 |
| H | -0.076031 | -6.385394 | 2.845448  | C | -3.719862 | -3.436099 | -1.668586 |
| C | -0.044926 | -4.562691 | 1.715181  | H | -3.965658 | -4.094383 | -2.497990 |
| H | -0.037930 | -5.051587 | 0.742720  | C | -2.390393 | -3.160614 | -1.363351 |
| C | 3.056522  | 1.810797  | 0.433509  | C | -1.243989 | -3.743858 | -2.069930 |
| H | 2.735282  | 1.186652  | 1.265520  | C | -1.290596 | -4.606911 | -3.161302 |
| C | 4.397706  | 2.056609  | 0.176506  | H | -2.240028 | -4.903633 | -3.599117 |
| H | 5.161092  | 1.625232  | 0.818500  | C | -0.094698 | -5.094315 | -3.690575 |
| C | 4.735212  | 2.880440  | -0.894847 | H | -0.115860 | -5.766898 | -4.544762 |
| H | 5.776031  | 3.103091  | -1.118433 | C | 1.123097  | -4.733211 | -3.121827 |
| C | 3.719862  | 3.436099  | -1.668586 | H | 2.052139  | -5.124990 | -3.527373 |
| H | 3.965658  | 4.094383  | -2.497990 | C | 1.128181  | -3.869275 | -2.025843 |
| C | 2.390393  | 3.160614  | -1.363351 | C | 2.298483  | -3.420236 | -1.270915 |
| C | 1.243989  | 3.743858  | -2.069930 | C | 3.598671  | -3.861595 | -1.509754 |
| C | 1.290596  | 4.606911  | -3.161302 | H | 3.800954  | -4.543151 | -2.332172 |
| H | 2.240028  | 4.903633  | -3.599117 | C | 4.632275  | -3.445979 | -0.677507 |
| C | 0.094698  | 5.094315  | -3.690575 | H | 5.647894  | -3.794365 | -0.849987 |
| H | 0.115860  | 5.766898  | -4.544762 | C | 4.341827  | -2.596238 | 0.387303  |
| C | -1.123097 | 4.733211  | -3.121827 | H | 5.117355  | -2.266389 | 1.073540  |
| H | -2.052139 | 5.124990  | -3.527373 | C | 3.030800  | -2.177814 | 0.573245  |
| C | -1.128181 | 3.869275  | -2.025843 | H | 2.750513  | -1.518444 | 1.392739  |

### Min-2 (4+ quartet)

E= -2543.806 65 a.u.

|    |           |           |           |   |           |           |           |
|----|-----------|-----------|-----------|---|-----------|-----------|-----------|
| Ru | 0.000000  | 2.011735  | -0.030504 | H | 0.395629  | 5.157691  | 5.076159  |
| N  | 0.147989  | 3.227386  | 1.724538  | N | -0.147989 | -3.227386 | 1.724538  |
| O  | -0.395123 | 0.558748  | -1.308859 | C | 0.258018  | 3.225989  | 4.131870  |
| O  | 0.395123  | -0.558748 | -1.308859 | H | 0.276169  | 2.666039  | 5.064045  |
| C  | 0.206050  | 4.571794  | 1.742592  | N | 2.060732  | 2.203840  | -0.414193 |
| H  | 0.181736  | 5.066284  | 0.773152  | C | 0.168728  | 2.548114  | 2.917535  |
| Ru | 0.000000  | -2.011735 | -0.030504 | N | 0.033507  | 3.374547  | -1.532010 |
| N  | 0.042141  | 0.675187  | 1.482537  | C | 0.080585  | 1.108339  | 2.771595  |
| C  | 0.298319  | 5.298587  | 2.922015  | N | -2.013512 | 2.626671  | -0.152264 |
| H  | 0.348827  | 6.383409  | 2.882986  | C | 0.000000  | 0.000000  | 3.626972  |
| N  | -0.042141 | -0.675187 | 1.482537  | H | 0.000000  | 0.000000  | 4.710866  |
| C  | 0.324913  | 4.614676  | 4.136622  | N | -2.060732 | -2.203840 | -0.414193 |

|   |           |           |           |   |           |           |           |
|---|-----------|-----------|-----------|---|-----------|-----------|-----------|
| C | -0.080585 | -1.108339 | 2.771595  | C | -4.601524 | 3.584772  | -0.501708 |
| N | -0.033507 | -3.374547 | -1.532010 | H | -5.611551 | 3.964299  | -0.637733 |
| C | -0.168728 | -2.548114 | 2.917535  | C | -4.298361 | 2.730420  | 0.555823  |
| N | 2.013512  | -2.626671 | -0.152264 | H | -5.056381 | 2.429534  | 1.274218  |
| C | -0.258018 | -3.225989 | 4.131870  | C | -2.994336 | 2.275594  | 0.697160  |
| H | -0.276169 | -2.666039 | 5.064045  | H | -2.703905 | 1.617389  | 1.514266  |
| C | -0.324913 | -4.614676 | 4.136622  | C | -3.053204 | -1.627862 | 0.286330  |
| H | -0.395629 | -5.157691 | 5.076159  | H | -2.741780 | -1.011435 | 1.127449  |
| C | -0.298319 | -5.298587 | 2.922015  | C | -4.391181 | -1.813926 | -0.030843 |
| H | -0.348827 | -6.383409 | 2.882986  | H | -5.161449 | -1.339031 | 0.571020  |
| C | -0.206050 | -4.571794 | 1.742592  | C | -4.717516 | -2.629938 | -1.111226 |
| H | -0.181736 | -5.066284 | 0.773152  | H | -5.756107 | -2.804614 | -1.382531 |
| C | 3.053204  | 1.627862  | 0.286330  | C | -3.694742 | -3.238121 | -1.833061 |
| H | 2.741780  | 1.011435  | 1.127449  | H | -3.932025 | -3.891940 | -2.668377 |
| C | 4.391181  | 1.813926  | -0.030843 | C | -2.368678 | -3.021742 | -1.469263 |
| H | 5.161449  | 1.339031  | 0.571020  | C | -1.219896 | -3.658075 | -2.121756 |
| C | 4.717516  | 2.629938  | -1.111226 | C | -1.257855 | -4.502655 | -3.229175 |
| H | 5.756107  | 2.804614  | -1.382531 | H | -2.199659 | -4.744188 | -3.714665 |
| C | 3.694742  | 3.238121  | -1.833061 | C | -0.065036 | -5.038271 | -3.713199 |
| H | 3.932025  | 3.891940  | -2.668377 | H | -0.078662 | -5.697531 | -4.577821 |
| C | 2.368678  | 3.021742  | -1.469263 | C | 1.141987  | -4.736283 | -3.088778 |
| C | 1.219896  | 3.658075  | -2.121756 | H | 2.070848  | -5.160011 | -3.461433 |
| C | 1.257855  | 4.502655  | -3.229175 | C | 1.136346  | -3.886878 | -1.982197 |
| H | 2.199659  | 4.744188  | -3.714665 | C | 2.293184  | -3.487137 | -1.180145 |
| C | 0.065036  | 5.038271  | -3.713199 | C | 3.586740  | -3.966999 | -1.372614 |
| H | 0.078662  | 5.697531  | -4.577821 | H | 3.797740  | -4.652254 | -2.189745 |
| C | -1.141987 | 4.736283  | -3.088778 | C | 4.601524  | -3.584772 | -0.501708 |
| H | -2.070848 | 5.160011  | -3.461433 | H | 5.611551  | -3.964299 | -0.637733 |
| C | -1.136346 | 3.886878  | -1.982197 | C | 4.298361  | -2.730420 | 0.555823  |
| C | -2.293184 | 3.487137  | -1.180145 | H | 5.056381  | -2.429534 | 1.274218  |
| C | -3.586740 | 3.966999  | -1.372614 | C | 2.994336  | -2.275594 | 0.697160  |
| H | -3.797740 | 4.652254  | -2.189745 | H | 2.703905  | -1.617389 | 1.514266  |

### TS-2 (3+ unrestricted singlet)

E= -2697.131 32 a.u.

|    |           |           |           |   |           |           |           |
|----|-----------|-----------|-----------|---|-----------|-----------|-----------|
| Ru | 2.014006  | 0.025010  | -0.006476 | H | 2.400601  | -0.119110 | 5.097887  |
| Ru | -2.193648 | -0.012303 | -0.071890 | N | 2.406458  | -2.058049 | 0.103504  |
| N  | 3.043304  | 0.207418  | 1.795910  | C | 2.339039  | 0.015358  | 2.955705  |
| O  | 0.273792  | 0.989485  | -1.002930 | N | 3.644893  | -0.112697 | -1.161449 |
| O  | -0.745806 | 0.146771  | -1.357231 | C | 0.926442  | -0.177015 | 2.758977  |
| C  | 4.369668  | 0.445246  | 1.869597  | N | 2.508875  | 2.044401  | -0.358901 |
| H  | 4.883437  | 0.600095  | 0.924378  | C | -0.174254 | -0.433186 | 3.580505  |
| N  | 0.514865  | -0.086538 | 1.459792  | H | -0.188921 | -0.550610 | 4.657024  |
| C  | 5.053102  | 0.488893  | 3.072212  | N | -2.534854 | 2.036911  | 0.264325  |
| H  | 6.121296  | 0.685565  | 3.074441  | C | -1.253115 | -0.487979 | 2.694144  |
| N  | -0.798602 | -0.279986 | 1.423697  | N | -3.668226 | 0.335647  | -1.360416 |
| C  | 4.347935  | 0.275982  | 4.257280  | C | -2.685965 | -0.665820 | 2.820414  |
| H  | 4.858118  | 0.298729  | 5.217048  | N | -2.506765 | -1.927076 | -0.874520 |
| N  | -3.379489 | -0.527057 | 1.649013  | C | -3.342451 | -0.961213 | 4.015164  |
| C  | 2.983302  | 0.041291  | 4.194031  | H | -2.767195 | -1.066380 | 4.931976  |

|   |           |           |           |   |           |           |           |
|---|-----------|-----------|-----------|---|-----------|-----------|-----------|
| C | -4.721434 | -1.120829 | 4.019275  | C | -1.929139 | 2.841372  | 1.151206  |
| H | -5.244718 | -1.350840 | 4.944111  | H | -1.162402 | 2.367305  | 1.762633  |
| C | -5.422084 | -0.986245 | 2.821763  | C | -2.260022 | 4.182005  | 1.297542  |
| H | -6.500779 | -1.107000 | 2.779851  | H | -1.749199 | 4.789337  | 2.040112  |
| C | -4.714917 | -0.691860 | 1.666108  | C | -3.264873 | 4.714376  | 0.494783  |
| H | -5.221068 | -0.576805 | 0.708676  | H | -3.556127 | 5.757828  | 0.585934  |
| C | 1.775464  | -2.985885 | 0.836813  | C | -3.904647 | 3.886986  | -0.421972 |
| H | 0.982523  | -2.616245 | 1.485423  | H | -4.698117 | 4.282175  | -1.051086 |
| C | 2.107318  | -4.334053 | 0.786091  | C | -3.532443 | 2.548816  | -0.524364 |
| H | 1.570134  | -5.048014 | 1.404754  | C | -4.169071 | 1.593976  | -1.444404 |
| C | 3.142554  | -4.734792 | -0.051962 | C | -5.203322 | 1.863220  | -2.337231 |
| H | 3.433711  | -5.780299 | -0.116909 | H | -5.622148 | 2.862534  | -2.420684 |
| C | 3.816289  | -3.773644 | -0.798294 | C | -5.701091 | 0.829148  | -3.129682 |
| H | 4.637514  | -4.066976 | -1.446724 | H | -6.507671 | 1.026330  | -3.831026 |
| C | 3.439409  | -2.436846 | -0.708563 | C | -5.174156 | -0.454626 | -3.022711 |
| C | 4.131852  | -1.351720 | -1.417768 | H | -5.568575 | -1.259834 | -3.636804 |
| C | 5.235634  | -1.492173 | -2.254774 | C | -4.140542 | -0.687347 | -2.115005 |
| H | 5.642798  | -2.474217 | -2.478608 | C | -3.479277 | -1.966429 | -1.841194 |
| C | 5.823281  | -0.352963 | -2.803798 | C | -3.801951 | -3.161851 | -2.481349 |
| H | 6.682282  | -0.452345 | -3.462452 | H | -4.575783 | -3.178418 | -3.244729 |
| C | 5.326232  | 0.908997  | -2.496709 | C | -3.133513 | -4.331395 | -2.139707 |
| H | 5.794336  | 1.799501  | -2.907397 | H | -3.379736 | -5.267663 | -2.634067 |
| C | 4.218886  | 1.008052  | -1.655398 | C | -2.150661 | -4.281817 | -1.154682 |
| C | 3.578721  | 2.236484  | -1.186584 | H | -1.606662 | -5.173272 | -0.854469 |
| C | 4.008591  | 3.521129  | -1.510525 | C | -1.871583 | -3.064231 | -0.549407 |
| H | 4.860145  | 3.659551  | -2.171767 | H | -1.117302 | -2.967233 | 0.229325  |
| C | 3.342683  | 4.620819  | -0.983600 | O | 1.414589  | -1.187134 | -2.276249 |
| H | 3.671236  | 5.628121  | -1.227345 | H | 1.598366  | -0.442992 | -2.898752 |
| C | 2.255818  | 4.412217  | -0.138058 | H | 0.444631  | -1.160698 | -2.192674 |
| H | 1.713312  | 5.245484  | 0.300120  | H | 1.051633  | 1.545287  | -2.746985 |
| C | 1.870148  | 3.109958  | 0.147095  | O | 1.750751  | 1.294147  | -3.380239 |
| H | 1.024186  | 2.880654  | 0.789931  | H | 1.469475  | 1.631967  | -4.242320 |

## TS-2 (4+ doublet)

**E= -2696.656 83 a.u.**

|    |           |           |           |   |           |           |           |
|----|-----------|-----------|-----------|---|-----------|-----------|-----------|
| Ru | 1.940588  | 0.022263  | 0.033722  | H | 2.269631  | -0.146779 | 5.185090  |
| Ru | -2.187572 | 0.003354  | -0.053853 | N | 2.356795  | -2.060203 | 0.095689  |
| N  | 2.962965  | 0.134651  | 1.884988  | C | 2.242686  | -0.027111 | 3.039990  |
| O  | 0.396328  | 0.756029  | -0.972585 | N | 3.618087  | -0.077875 | -1.060228 |
| O  | -0.593828 | -0.144445 | -1.219619 | C | 0.824394  | -0.160414 | 2.829739  |
| C  | 4.294089  | 0.342617  | 1.975660  | N | 2.444293  | 2.056472  | -0.207013 |
| H  | 4.831179  | 0.476853  | 1.041035  | C | -0.302475 | -0.321853 | 3.648357  |
| N  | 0.438492  | -0.085637 | 1.527010  | H | -0.332042 | -0.401553 | 4.728179  |
| C  | 4.962241  | 0.370066  | 3.189177  | N | -2.531843 | 2.082150  | 0.082479  |
| H  | 6.036752  | 0.531267  | 3.202965  | C | -1.372412 | -0.340156 | 2.755337  |
| N  | -0.884606 | -0.203223 | 1.482591  | N | -3.516988 | 0.314589  | -1.541962 |
| C  | 4.239340  | 0.182828  | 4.367521  | C | -2.818270 | -0.414870 | 2.840644  |
| H  | 4.738959  | 0.196673  | 5.333310  | N | -2.677657 | -1.956670 | -0.639462 |
| N  | -3.460103 | -0.285274 | 1.635153  | C | -3.536504 | -0.604883 | 4.020069  |
| C  | 2.868170  | -0.012499 | 4.287245  | H | -3.005812 | -0.705536 | 4.963918  |



|   |           |           |           |   |           |           |           |
|---|-----------|-----------|-----------|---|-----------|-----------|-----------|
| C | -4.924128 | -0.668268 | 3.975442  | C | -2.056193 | 2.911244  | 1.028476  |
| H | -5.496513 | -0.816361 | 4.888096  | H | -1.439947 | 2.447561  | 1.797639  |
| C | -5.569021 | -0.542610 | 2.745863  | C | -2.340012 | 4.269645  | 1.040101  |
| H | -6.651921 | -0.586445 | 2.667762  | H | -1.946852 | 4.898829  | 1.834387  |
| C | -4.804026 | -0.355337 | 1.603272  | C | -3.155612 | 4.792431  | 0.039102  |
| H | -5.266441 | -0.249688 | 0.623450  | H | -3.408921 | 5.849979  | 0.024068  |
| C | 1.681095  | -3.008405 | 0.761400  | C | -3.665257 | 3.937659  | -0.933739 |
| H | 0.851157  | -2.658044 | 1.371910  | H | -4.319876 | 4.325273  | -1.710224 |
| C | 2.021346  | -4.353560 | 0.691008  | C | -3.352176 | 2.581530  | -0.895217 |
| H | 1.451734  | -5.087507 | 1.254733  | C | -3.893647 | 1.585177  | -1.826952 |
| C | 3.110047  | -4.727420 | -0.090237 | C | -4.749116 | 1.829243  | -2.898667 |
| H | 3.411342  | -5.769828 | -0.162612 | H | -5.066961 | 2.839962  | -3.140695 |
| C | 3.823976  | -3.743897 | -0.770066 | C | -5.204070 | 0.752947  | -3.660572 |
| H | 4.683154  | -4.018721 | -1.376253 | H | -5.871680 | 0.928221  | -4.500692 |
| C | 3.434672  | -2.413019 | -0.666724 | C | -4.820063 | -0.545343 | -3.338207 |
| C | 4.148494  | -1.301505 | -1.308439 | H | -5.191035 | -1.384594 | -3.920600 |
| C | 5.310351  | -1.398789 | -2.068217 | C | -3.965186 | -0.748131 | -2.253649 |
| H | 5.760798  | -2.366039 | -2.274235 | C | -3.505125 | -2.035342 | -1.730080 |
| C | 5.908203  | -0.233759 | -2.551475 | C | -3.910812 | -3.272552 | -2.226832 |
| H | 6.819490  | -0.299336 | -3.141443 | H | -4.568798 | -3.323904 | -3.090680 |
| C | 5.359924  | 1.010499  | -2.258762 | C | -3.490516 | -4.440343 | -1.599760 |
| H | 5.840105  | 1.918629  | -2.613286 | H | -3.810229 | -5.409378 | -1.975549 |
| C | 4.197591  | 1.069979  | -1.490427 | C | -2.674318 | -4.346426 | -0.474987 |
| C | 3.526607  | 2.278446  | -1.014184 | H | -2.342979 | -5.234162 | 0.056945  |
| C | 3.960240  | 3.576190  | -1.280330 | C | -2.292164 | -3.089156 | -0.027215 |
| H | 4.819832  | 3.743598  | -1.924458 | H | -1.664246 | -2.959571 | 0.851769  |
| C | 3.296130  | 4.654667  | -0.706165 | O | 1.589141  | -1.291720 | -2.461604 |
| H | 3.630638  | 5.670659  | -0.902042 | H | 1.892880  | -0.706261 | -3.198555 |
| C | 2.208738  | 4.411951  | 0.129614  | H | 0.624462  | -1.318424 | -2.545143 |
| H | 1.673637  | 5.227419  | 0.608723  | H | 2.297962  | 0.983040  | -4.892409 |
| C | 1.812238  | 3.099505  | 0.350054  | O | 2.763340  | 0.295921  | -4.393714 |
| H | 0.965894  | 2.848794  | 0.985553  | H | 3.189232  | -0.236799 | -5.082424 |

### Min-3 (3+ triplet)

**E= -2697.135 78 a.u.**

|    |           |           |           |   |           |           |           |
|----|-----------|-----------|-----------|---|-----------|-----------|-----------|
| Ru | 2.217294  | 0.003869  | -0.031227 | H | 2.270347  | 0.427555  | 5.030520  |
| Ru | -2.309093 | -0.051687 | -0.115340 | N | 2.710885  | -2.017540 | 0.297022  |
| N  | 3.116294  | 0.493179  | 1.757485  | C | 2.352442  | 0.355032  | 2.882606  |
| O  | -0.275203 | 1.456193  | -1.152676 | N | 3.873982  | -0.167698 | -1.128796 |
| O  | -1.049400 | 0.440463  | -1.575059 | C | 0.971638  | 0.034390  | 2.625646  |
| C  | 4.410721  | 0.848379  | 1.889786  | N | 2.562964  | 1.990978  | -0.624165 |
| H  | 4.973941  | 0.952521  | 0.965120  | C | -0.108695 | -0.266240 | 3.449897  |
| N  | 0.576957  | 0.014925  | 1.307949  | H | -0.125338 | -0.328850 | 4.530913  |
| C  | 5.001753  | 1.064673  | 3.122863  | N | -2.872485 | 1.918108  | 0.386816  |
| H  | 6.048286  | 1.351059  | 3.173979  | C | -1.167307 | -0.456913 | 2.562764  |
| N  | -0.732081 | -0.273369 | 1.274568  | N | -3.898387 | 0.200424  | -1.271838 |
| C  | 4.234311  | 0.903842  | 4.277622  | C | -2.564568 | -0.777690 | 2.751299  |
| H  | 4.672928  | 1.059403  | 5.260060  | N | -2.455873 | -1.934568 | -1.011516 |
| N  | -3.321052 | -0.736551 | 1.614524  | C | -3.126551 | -1.131151 | 3.979968  |
| C  | 2.900308  | 0.548973  | 4.152652  | H | -2.501883 | -1.156763 | 4.869675  |

|   |           |           |           |   |           |           |           |
|---|-----------|-----------|-----------|---|-----------|-----------|-----------|
| C | -4.472795 | -1.457973 | 4.048642  | C | -2.280426 | 2.741237  | 1.265536  |
| H | -4.923350 | -1.736020 | 4.998175  | H | -1.404937 | 2.335941  | 1.770923  |
| C | -5.235665 | -1.431168 | 2.880974  | C | -2.746873 | 4.024143  | 1.519735  |
| H | -6.292101 | -1.684004 | 2.889518  | H | -2.240747 | 4.650752  | 2.248964  |
| C | -4.623927 | -1.067058 | 1.692005  | C | -3.870237 | 4.476685  | 0.833504  |
| H | -5.181944 | -1.023953 | 0.758168  | H | -4.265979 | 5.473603  | 1.010875  |
| C | 2.103012  | -2.894935 | 1.112022  | C | -4.485242 | 3.633192  | -0.084863 |
| H | 1.272055  | -2.500644 | 1.695276  | H | -5.361594 | 3.969368  | -0.633064 |
| C | 2.502428  | -4.221042 | 1.216457  | C | -3.975263 | 2.354462  | -0.296643 |
| H | 1.983363  | -4.890299 | 1.897142  | C | -4.552135 | 1.389101  | -1.240817 |
| C | 3.575895  | -4.659385 | 0.447279  | C | -5.660259 | 1.587855  | -2.061173 |
| H | 3.918770  | -5.689464 | 0.505673  | H | -6.198974 | 2.531593  | -2.048045 |
| C | 4.216578  | -3.755125 | -0.392629 | C | -6.072766 | 0.559450  | -2.906525 |
| H | 5.064569  | -4.075281 | -0.992390 | H | -6.934492 | 0.702515  | -3.553091 |
| C | 3.776778  | -2.435138 | -0.453826 | C | -5.386858 | -0.651377 | -2.921731 |
| C | 4.423433  | -1.398705 | -1.268581 | H | -5.711752 | -1.455243 | -3.576981 |
| C | 5.524939  | -1.570226 | -2.104428 | C | -4.284770 | -0.816925 | -2.082787 |
| H | 5.981127  | -2.548347 | -2.230175 | C | -3.467518 | -2.023425 | -1.934898 |
| C | 6.039792  | -0.467023 | -2.782631 | C | -3.688597 | -3.206350 | -2.638140 |
| H | 6.896092  | -0.587966 | -3.441057 | H | -4.493615 | -3.263042 | -3.366456 |
| C | 5.465734  | 0.789129  | -2.613827 | C | -2.881558 | -4.312494 | -2.402256 |
| H | 5.868805  | 1.651688  | -3.137692 | H | -3.049359 | -5.238726 | -2.945932 |
| C | 4.364894  | 0.921409  | -1.767581 | C | -1.863921 | -4.215237 | -1.456385 |
| C | 3.648084  | 2.154669  | -1.440908 | H | -1.214890 | -5.058442 | -1.237016 |
| C | 4.027439  | 3.417472  | -1.887165 | C | -1.687050 | -3.013912 | -0.785324 |
| H | 4.891660  | 3.528552  | -2.537029 | H | -0.909215 | -2.880973 | -0.034966 |
| C | 3.298573  | 4.532311  | -1.492665 | O | 1.326112  | -0.790642 | -1.849876 |
| H | 3.585076  | 5.523972  | -1.833747 | H | 1.505166  | -0.124110 | -2.577192 |
| C | 2.204950  | 4.357301  | -0.648874 | H | 0.349650  | -0.723700 | -1.770863 |
| H | 1.613250  | 5.203158  | -0.310251 | H | 0.771817  | 1.733890  | -2.757433 |
| C | 1.872197  | 3.074860  | -0.235089 | O | 1.476753  | 1.390886  | -3.348897 |
| H | 1.016698  | 2.876417  | 0.406402  | H | 1.133675  | 1.473031  | -4.250408 |

### Min-3 (4+ doublet)

**E= -2696.666 42 a.u.**

|    |           |           |           |   |           |           |           |
|----|-----------|-----------|-----------|---|-----------|-----------|-----------|
| Ru | -2.191991 | -0.063222 | -0.035939 | H | -2.128501 | -1.894247 | 4.701945  |
| Ru | 2.355760  | 0.071774  | -0.159777 | N | -2.812263 | 1.720689  | 0.926313  |
| N  | -3.040428 | -1.081235 | 1.550119  | C | -2.257971 | -1.228336 | 2.660070  |
| O  | 0.253004  | -1.095317 | -1.484724 | N | -3.911946 | 0.376604  | -1.007797 |
| O  | 1.110341  | -0.114863 | -1.621516 | C | -0.895639 | -0.785606 | 2.485556  |
| C  | -4.320556 | -1.503882 | 1.588919  | N | -2.549785 | -1.795099 | -1.168041 |
| H  | -4.900724 | -1.368415 | 0.679095  | C | 0.179829  | -0.641076 | 3.352879  |
| N  | -0.529773 | -0.400969 | 1.214460  | H | 0.213280  | -0.855169 | 4.414145  |
| C  | -4.876699 | -2.078878 | 2.720246  | N | 2.944592  | -1.964948 | -0.012134 |
| H  | -5.911642 | -2.409076 | 2.701347  | C | 1.210609  | -0.161713 | 2.540733  |
| N  | 0.766789  | -0.032448 | 1.253928  | N | 3.984295  | 0.050798  | -1.315770 |
| C  | -4.090222 | -2.217998 | 3.864518  | C | 2.592811  | 0.183519  | 2.806287  |
| H  | -4.502284 | -2.659283 | 4.768898  | N | 2.543737  | 2.104625  | -0.648242 |
| N  | 3.334831  | 0.464233  | 1.694181  | C | 3.146605  | 0.268781  | 4.083619  |
| C  | -2.770245 | -1.789777 | 3.830394  | H | 2.537914  | 0.039071  | 4.954919  |

|   |           |           |           |   |           |           |           |
|---|-----------|-----------|-----------|---|-----------|-----------|-----------|
| C | 4.471711  | 0.661270  | 4.229412  | C | 2.358860  | -2.942764 | 0.697348  |
| H | 4.917715  | 0.733594  | 5.218559  | H | 1.487652  | -2.646742 | 1.279643  |
| C | 5.216356  | 0.969118  | 3.091205  | C | 2.831175  | -4.249204 | 0.700768  |
| H | 6.252934  | 1.286890  | 3.162717  | H | 2.332472  | -5.005775 | 1.300375  |
| C | 4.612923  | 0.858191  | 1.846857  | C | 3.953955  | -4.556452 | -0.061806 |
| H | 5.160139  | 1.078321  | 0.931972  | H | 4.356368  | -5.566653 | -0.077337 |
| C | -2.206041 | 2.325224  | 1.963056  | C | 4.564204  | -3.549187 | -0.805158 |
| H | -1.328047 | 1.822743  | 2.364137  | H | 5.441418  | -3.773584 | -1.406506 |
| C | -2.667070 | 3.520010  | 2.501189  | C | 4.049542  | -2.256974 | -0.768278 |
| H | -2.148881 | 3.967066  | 3.345240  | C | 4.632830  | -1.125073 | -1.504991 |
| C | -3.797944 | 4.114172  | 1.948734  | C | 5.752106  | -1.163173 | -2.332464 |
| H | -4.190307 | 5.045305  | 2.350936  | H | 6.291737  | -2.091472 | -2.499819 |
| C | -4.429705 | 3.493001  | 0.876057  | C | 6.178984  | 0.012473  | -2.951306 |
| H | -5.319151 | 3.937862  | 0.437301  | H | 7.049396  | -0.005754 | -3.602723 |
| C | -3.927696 | 2.293499  | 0.377847  | C | 5.503126  | 1.209001  | -2.731115 |
| C | -4.549123 | 1.534760  | -0.711568 | H | 5.845823  | 2.124559  | -3.205811 |
| C | -5.713852 | 1.879808  | -1.395822 | C | 4.389135  | 1.210808  | -1.890431 |
| H | -6.244678 | 2.798877  | -1.162061 | C | 3.584200  | 2.371503  | -1.503129 |
| C | -6.207665 | 1.018408  | -2.373028 | C | 3.853976  | 3.676109  | -1.911744 |
| H | -7.119147 | 1.271462  | -2.909255 | H | 4.682355  | 3.876529  | -2.586598 |
| C | -5.549872 | -0.177204 | -2.644656 | C | 3.068735  | 4.722810  | -1.441248 |
| H | -5.948945 | -0.865981 | -3.384824 | H | 3.277578  | 5.744723  | -1.748574 |
| C | -4.387472 | -0.485790 | -1.937898 | C | 2.022670  | 4.441435  | -0.566166 |
| C | -3.612372 | -1.722249 | -2.029210 | H | 1.392420  | 5.232630  | -0.169770 |
| C | -3.936463 | -2.797176 | -2.852932 | C | 1.793073  | 3.122862  | -0.195482 |
| H | -4.780135 | -2.727502 | -3.535045 | H | 0.986948  | 2.846546  | 0.482174  |
| C | -3.188262 | -3.967893 | -2.782485 | O | -1.303087 | 1.257697  | -1.501831 |
| H | -3.437485 | -4.815847 | -3.416032 | H | -1.851172 | 1.457789  | -2.316659 |
| C | -2.133354 | -4.041258 | -1.876964 | H | -0.439014 | 0.947731  | -1.834109 |
| H | -1.537011 | -4.943923 | -1.778485 | H | -2.586385 | 1.362089  | -4.523113 |
| C | -1.845727 | -2.936944 | -1.086276 | O | -2.790935 | 1.795259  | -3.680450 |
| H | -1.021968 | -2.933430 | -0.376856 | H | -2.922225 | 2.725895  | -3.918462 |

### Min-3 (4+ quartet)

E= -2696.663 55 a.u.

|    |           |           |           |   |           |           |           |
|----|-----------|-----------|-----------|---|-----------|-----------|-----------|
| Ru | -2.254317 | -0.028912 | -0.001079 | H | -2.264311 | -0.441430 | 5.050909  |
| Ru | 2.321047  | 0.043011  | -0.132451 | N | -2.917600 | 1.949256  | 0.305291  |
| N  | -3.158342 | -0.501372 | 1.791224  | C | -2.377377 | -0.363172 | 2.903246  |
| O  | 0.625667  | -1.518043 | -1.167481 | N | -3.911475 | 0.054104  | -1.157101 |
| O  | 1.247724  | -0.526557 | -1.757020 | C | -0.999728 | -0.033093 | 2.622719  |
| C  | -4.453479 | -0.847064 | 1.936869  | N | -2.518508 | -2.028228 | -0.568630 |
| H  | -5.031740 | -0.945097 | 1.021001  | C | 0.084226  | 0.284353  | 3.427083  |
| N  | -0.622653 | -0.007342 | 1.296238  | H | 0.114895  | 0.352496  | 4.507653  |
| C  | -5.026012 | -1.063660 | 3.180258  | N | 3.053937  | -1.863870 | 0.391429  |
| H  | -6.073429 | -1.344541 | 3.247517  | C | 1.133593  | 0.481556  | 2.525176  |
| N  | 0.698054  | 0.292062  | 1.244791  | N | 3.953158  | -0.108893 | -1.283850 |
| C  | -4.239998 | -0.911047 | 4.322981  | C | 2.531056  | 0.804338  | 2.721738  |
| H  | -4.664466 | -1.068838 | 5.311563  | N | 2.411300  | 1.980241  | -0.976878 |
| N  | 3.303955  | 0.732662  | 1.597925  | C | 3.078192  | 1.178141  | 3.949709  |
| C  | -2.904720 | -0.558830 | 4.180051  | H | 2.443060  | 1.227466  | 4.830959  |

|   |           |           |           |   |           |           |           |
|---|-----------|-----------|-----------|---|-----------|-----------|-----------|
| C | 4.428031  | 1.495936  | 4.031782  | C | 2.553717  | -2.684093 | 1.329382  |
| H | 4.867131  | 1.791633  | 4.981584  | H | 1.669954  | -2.320899 | 1.852543  |
| C | 5.206600  | 1.434407  | 2.877118  | C | 3.120818  | -3.918170 | 1.619368  |
| H | 6.265236  | 1.678481  | 2.894857  | H | 2.686109  | -4.546346 | 2.392157  |
| C | 4.610206  | 1.046947  | 1.685682  | C | 4.248515  | -4.322240 | 0.909212  |
| H | 5.184753  | 0.976762  | 0.764344  | H | 4.719419  | -5.281107 | 1.112530  |
| C | -2.393544 | 2.843647  | 1.162308  | C | 4.773196  | -3.476963 | -0.063072 |
| H | -1.564975 | 2.490398  | 1.774306  | H | 5.657699  | -3.771485 | -0.622249 |
| C | -2.876124 | 4.141194  | 1.270233  | C | 4.167731  | -2.246306 | -0.306610 |
| H | -2.426096 | 4.827351  | 1.982645  | C | 4.664422  | -1.261233 | -1.271665 |
| C | -3.943928 | 4.530116  | 0.465730  | C | 5.767091  | -1.400215 | -2.115368 |
| H | -4.350641 | 5.536714  | 0.529830  | H | 6.351876  | -2.316304 | -2.121510 |
| C | -4.498646 | 3.605509  | -0.413823 | C | 6.112280  | -0.343960 | -2.953976 |
| H | -5.343347 | 3.886171  | -1.037826 | H | 6.967655  | -0.436926 | -3.618750 |
| C | -3.979532 | 2.315236  | -0.478104 | C | 5.371989  | 0.837388  | -2.936993 |
| C | -4.535354 | 1.246344  | -1.312770 | H | 5.653892  | 1.664411  | -3.583161 |
| C | -5.629573 | 1.347002  | -2.171093 | C | 4.277150  | 0.938942  | -2.080266 |
| H | -6.147680 | 2.292965  | -2.304608 | C | 3.418172  | 2.117321  | -1.898030 |
| C | -6.063182 | 0.210853  | -2.851750 | C | 3.611832  | 3.325908  | -2.562323 |
| H | -6.916731 | 0.274190  | -3.522469 | H | 4.413931  | 3.428355  | -3.288706 |
| C | -5.417561 | -1.008024 | -2.660987 | C | 2.784064  | 4.409241  | -2.283558 |
| H | -5.767457 | -1.899271 | -3.175367 | H | 2.934865  | 5.357614  | -2.793858 |
| C | -4.326419 | -1.066460 | -1.794364 | C | 1.776034  | 4.263374  | -1.334512 |
| C | -3.552179 | -2.255650 | -1.438055 | H | 1.120936  | 5.090751  | -1.076569 |
| C | -3.837312 | -3.542906 | -1.883546 | C | 1.625373  | 3.035571  | -0.703802 |
| H | -4.662552 | -3.712413 | -2.570624 | H | 0.862818  | 2.866664  | 0.054998  |
| C | -3.073382 | -4.613035 | -1.429324 | O | -1.294027 | 0.656263  | -1.802380 |
| H | -3.294741 | -5.624167 | -1.763004 | H | -1.492056 | 0.072104  | -2.596386 |
| C | -2.036356 | -4.371468 | -0.531217 | H | -0.320989 | 0.640063  | -1.749315 |
| H | -1.426563 | -5.182471 | -0.143148 | H | -1.055691 | -1.716832 | -3.899616 |
| C | -1.792581 | -3.068404 | -0.120829 | O | -1.761999 | -1.062614 | -3.784408 |
| H | -0.994676 | -2.820913 | 0.575517  | H | -1.957707 | -0.752608 | -4.682808 |

### TS-3 (3+ triplet)

E= -2773.531 82 a.u.

|    |           |           |           |   |           |           |           |
|----|-----------|-----------|-----------|---|-----------|-----------|-----------|
| Ru | -2.375496 | -0.087337 | -0.090673 | H | -2.422801 | -1.170873 | 4.865140  |
| Ru | 2.303511  | -0.058216 | -0.081609 | N | -2.681963 | 1.959398  | 0.167725  |
| N  | -3.319290 | -0.467307 | 1.684862  | C | -2.526476 | -0.709993 | 2.768081  |
| O  | 0.391590  | -2.357350 | -1.491183 | N | -3.988131 | 0.176521  | -1.182484 |
| O  | 0.833849  | -1.203788 | -1.683530 | C | -1.107226 | -0.662513 | 2.508883  |
| C  | -4.659550 | -0.492296 | 1.846021  | N | -2.778689 | -2.058765 | -0.678548 |
| H  | -5.249166 | -0.290585 | 0.955123  | C | -0.015028 | -0.820810 | 3.354592  |
| N  | -0.689293 | -0.413618 | 1.225071  | H | -0.018832 | -1.016727 | 4.419601  |
| C  | -5.262574 | -0.754675 | 3.064396  | N | 3.090182  | -1.967013 | -0.568745 |
| H  | -6.346435 | -0.762100 | 3.135678  | C | 1.081260  | -0.656970 | 2.516082  |
| N  | 0.661315  | -0.423914 | 1.231769  | N | 3.882916  | 0.408185  | -1.185518 |
| C  | -4.458139 | -1.003783 | 4.175852  | C | 2.496633  | -0.633213 | 2.764491  |
| H  | -4.900359 | -1.213580 | 5.146400  | N | 2.382979  | 2.007736  | 0.229288  |
| N  | 3.272007  | -0.336951 | 1.677790  | C | 3.086718  | -0.872555 | 4.009363  |
| C  | -3.080689 | -0.979547 | 4.020876  | H | 2.450229  | -1.108553 | 4.858548  |

|   |           |           |           |   |           |           |           |
|---|-----------|-----------|-----------|---|-----------|-----------|-----------|
| C | 4.462934  | -0.810606 | 4.147729  | C | 3.299471  | -4.349672 | -0.452131 |
| H | 4.927814  | -0.996740 | 5.112624  | H | 2.942383  | -5.286468 | -0.033547 |
| C | 5.242449  | -0.507263 | 3.029356  | C | 4.365876  | -4.316614 | -1.343868 |
| H | 6.325165  | -0.446967 | 3.090558  | H | 4.863765  | -5.233289 | -1.649732 |
| C | 4.615047  | -0.280660 | 1.818457  | C | 4.800200  | -3.087747 | -1.830360 |
| H | 5.180995  | -0.043669 | 0.921706  | H | 5.643845  | -3.036770 | -2.514211 |
| C | -2.061246 | 2.799381  | 1.013404  | C | 4.158740  | -1.920957 | -1.422595 |
| H | -1.268873 | 2.349098  | 1.608177  | C | 4.589316  | -0.572046 | -1.802587 |
| C | -2.402068 | 4.138459  | 1.139748  | C | 5.638323  | -0.234814 | -2.658199 |
| H | -1.874688 | 4.767851  | 1.851824  | H | 6.208310  | -1.006525 | -3.168919 |
| C | -3.435185 | 4.645138  | 0.355805  | C | 5.951324  | 1.108545  | -2.846777 |
| H | -3.732743 | 5.688136  | 0.429642  | H | 6.766206  | 1.387095  | -3.509904 |
| C | -4.106250 | 3.782906  | -0.503521 | C | 5.234951  | 2.097244  | -2.173824 |
| H | -4.941356 | 4.145446  | -1.098075 | H | 5.496839  | 3.143866  | -2.305715 |
| C | -3.732216 | 2.442020  | -0.575759 | C | 4.190364  | 1.723699  | -1.330501 |
| C | -4.446700 | 1.440808  | -1.373046 | C | 3.377246  | 2.616668  | -0.495121 |
| C | -5.522848 | 1.665521  | -2.230282 | C | 3.612250  | 3.983974  | -0.368221 |
| H | -5.904356 | 2.670562  | -2.391064 | H | 4.408546  | 4.454608  | -0.939795 |
| C | -6.106352 | 0.583884  | -2.885483 | C | 2.850383  | 4.739041  | 0.518421  |
| H | -6.945942 | 0.744388  | -3.556464 | H | 3.042139  | 5.802949  | 0.635555  |
| C | -5.611638 | -0.702928 | -2.686796 | C | 1.865266  | 4.104532  | 1.269263  |
| H | -6.057844 | -1.546263 | -3.207490 | H | 1.266917  | 4.651299  | 1.993293  |
| C | -4.534254 | -0.891076 | -1.822182 | C | 1.666749  | 2.741344  | 1.094876  |
| C | -3.886498 | -2.163188 | -1.484734 | H | 0.918687  | 2.187976  | 1.659488  |
| C | -4.358696 | -3.405767 | -1.901517 | O | -1.400265 | 0.385650  | -2.013581 |
| H | -5.236113 | -3.467324 | -2.540595 | H | -1.448741 | -0.393573 | -2.590870 |
| C | -3.719923 | -4.565250 | -1.477290 | H | -0.431022 | 0.585504  | -1.967856 |
| H | -4.086445 | -5.539549 | -1.790316 | H | 1.467299  | 1.087597  | -3.104866 |
| C | -2.618602 | -4.453788 | -0.633688 | O | 1.187792  | 1.251814  | -2.191557 |
| H | -2.101845 | -5.334443 | -0.262464 | H | 0.937582  | 2.209016  | -2.136228 |
| C | -2.182499 | -3.189525 | -0.261438 | H | 0.292682  | 4.541286  | -2.00435  |
| H | -1.321538 | -3.047145 | 0.388346  | O | -0.02623  | 3.642262  | -1.83889  |
| C | 2.685931  | -3.154038 | -0.094947 | H | -0.86002  | 3.589295  | -2.3289   |
| H | 1.838289  | -3.124321 | 0.586532  |   |           |           |           |

### TS-3 (4+ doublet)

E= -2773.066 26 a.u.

|    |           |           |           |   |           |           |           |
|----|-----------|-----------|-----------|---|-----------|-----------|-----------|
| Ru | -2.363395 | -0.080421 | -0.081760 | N | 3.249105  | -0.461833 | 1.641311  |
| Ru | 2.294564  | -0.086868 | -0.103238 | C | -3.125086 | -0.896791 | 4.034036  |
| N  | -3.342634 | -0.410440 | 1.690495  | H | -2.479600 | -1.089705 | 4.887349  |
| O  | 0.157056  | -2.140282 | -1.319991 | N | -2.689036 | 1.977128  | 0.156041  |
| O  | 0.837900  | -1.142610 | -1.652359 | C | -2.559582 | -0.654115 | 2.780645  |
| C  | -4.684022 | -0.405470 | 1.836143  | N | -3.982678 | 0.221308  | -1.239027 |
| H  | -5.264734 | -0.203745 | 0.939494  | C | -1.142664 | -0.635950 | 2.516817  |
| N  | -0.728127 | -0.395658 | 1.217205  | N | -2.908451 | -2.043652 | -0.613309 |
| C  | -5.297919 | -0.640039 | 3.056054  | C | -0.047259 | -0.816490 | 3.342722  |
| H  | -6.382318 | -0.624923 | 3.122138  | H | -0.039776 | -1.017253 | 4.406790  |
| N  | 0.624937  | -0.429822 | 1.206549  | N | 3.053136  | -2.009713 | -0.652221 |
| C  | -4.505036 | -0.891126 | 4.176533  | C | 1.044676  | -0.675857 | 2.486683  |
| H  | -4.959619 | -1.079375 | 5.146130  | N | 3.896932  | 0.369708  | -1.193569 |

|   |           |           |           |   |           |           |           |
|---|-----------|-----------|-----------|---|-----------|-----------|-----------|
| C | 2.462997  | -0.719718 | 2.731386  | C | 2.629377  | -3.201945 | -0.210162 |
| N | 2.469410  | 1.969856  | 0.307247  | H | 1.789104  | -3.178783 | 0.481068  |
| C | 3.035111  | -1.004816 | 3.973585  | C | 3.211273  | -4.398301 | -0.615123 |
| H | 2.388945  | -1.207605 | 4.824140  | H | 2.840872  | -5.340810 | -0.221383 |
| C | 4.414844  | -1.034099 | 4.109051  | C | 4.266025  | -4.359186 | -1.521744 |
| H | 4.870552  | -1.256133 | 5.070875  | H | 4.739805  | -5.276076 | -1.863980 |
| C | 5.205694  | -0.777808 | 2.988148  | C | 4.719615  | -3.124449 | -1.975192 |
| H | 6.290730  | -0.789849 | 3.045741  | H | 5.554580  | -3.071079 | -2.669460 |
| C | 4.592606  | -0.500242 | 1.777384  | C | 4.109501  | -1.957584 | -1.519791 |
| H | 5.173863  | -0.294698 | 0.883021  | C | 4.570349  | -0.607230 | -1.852118 |
| C | -2.057961 | 2.795264  | 1.015154  | C | 5.630145  | -0.269526 | -2.695939 |
| H | -1.315206 | 2.321119  | 1.653491  | H | 6.173874  | -1.037696 | -3.239624 |
| C | -2.341363 | 4.151200  | 1.098723  | C | 5.991513  | 1.068028  | -2.826549 |
| H | -1.818084 | 4.770799  | 1.822248  | H | 6.815121  | 1.346445  | -3.479423 |
| C | -3.320679 | 4.684810  | 0.265139  | C | 5.315661  | 2.050307  | -2.102481 |
| H | -3.577561 | 5.740505  | 0.312551  | H | 5.621048  | 3.090238  | -2.183937 |
| C | -3.993601 | 3.840323  | -0.612009 | C | 4.259422  | 1.677123  | -1.273860 |
| H | -4.782836 | 4.232401  | -1.248560 | C | 3.495195  | 2.562728  | -0.385519 |
| C | -3.676021 | 2.485037  | -0.647281 | C | 3.810208  | 3.904746  | -0.177853 |
| C | -4.390940 | 1.493859  | -1.456846 | H | 4.633443  | 4.362365  | -0.721045 |
| C | -5.433629 | 1.743573  | -2.348075 | C | 3.095950  | 4.648797  | 0.757229  |
| H | -5.782133 | 2.757055  | -2.528602 | H | 3.355391  | 5.688874  | 0.942137  |
| C | -6.032947 | 0.671599  | -3.006348 | C | 2.070730  | 4.030592  | 1.469729  |
| H | -6.847335 | 0.850095  | -3.704216 | H | 1.510123  | 4.566765  | 2.231279  |
| C | -5.595352 | -0.628449 | -2.767361 | C | 1.793394  | 2.693721  | 1.214980  |
| H | -6.065222 | -1.465665 | -3.276919 | H | 1.016441  | 2.154596  | 1.754240  |
| C | -4.549451 | -0.836192 | -1.867236 | O | -1.407758 | 0.376434  | -1.992331 |
| C | -3.972631 | -2.124966 | -1.474895 | H | -1.407076 | -0.391874 | -2.586998 |
| C | -4.469434 | -3.360152 | -1.882323 | H | -0.458196 | 0.677201  | -1.974703 |
| H | -5.312487 | -3.410884 | -2.566828 | H | 1.473600  | 1.201392  | -3.003902 |
| C | -3.897176 | -4.529129 | -1.390413 | O | 1.138444  | 1.335338  | -2.102831 |
| H | -4.284331 | -5.498599 | -1.694928 | H | 0.982903  | 2.312888  | -2.007086 |
| C | -2.836933 | -4.435249 | -0.492950 | H | 0.730397  | 4.637715  | -1.41938  |
| H | -2.373049 | -5.323671 | -0.073507 | O | 0.257949  | 3.88187   | -1.7967   |
| C | -2.373259 | -3.178542 | -0.128126 | H | -0.13849  | 4.236009  | -2.60767  |
| H | -1.539089 | -3.051259 | 0.558331  |   |           |           |           |

## Structures for complex 20<sup>3+</sup>

### Min-1 (3+ unrestricted singlet)

E= -2658.839 91 a.u.

|    |           |           |           |   |           |           |           |
|----|-----------|-----------|-----------|---|-----------|-----------|-----------|
| Ru | -2.435707 | -0.356728 | 0.054946  | C | -5.300055 | -3.428571 | 0.256973  |
| Ru | 1.930179  | 0.106023  | 0.083894  | H | -5.470987 | -4.384855 | -0.229854 |
| N  | -3.544089 | 0.872452  | -1.447852 | C | -6.186808 | -2.968887 | 1.228337  |
| O  | -1.351971 | -1.020762 | 1.272340  | C | -5.982536 | -1.738197 | 1.849738  |
| O  | 1.067717  | -1.401075 | -0.204725 | H | -6.684072 | -1.383376 | 2.599766  |
| C  | -4.792509 | 0.661168  | -1.899060 | C | -4.869326 | -0.979146 | 1.492727  |
| H  | -5.256771 | -0.277854 | -1.597744 | C | -4.503665 | 0.344180  | 2.020715  |
| N  | -1.020860 | 1.052754  | -0.676225 | C | -5.243808 | 1.017768  | 2.989563  |
| C  | -5.468470 | 1.567448  | -2.702005 | H | -6.138711 | 0.564089  | 3.407606  |
| H  | -6.474427 | 1.345070  | -3.046165 | C | -4.832522 | 2.274558  | 3.421402  |
| N  | 0.237288  | 1.336221  | -0.316455 | H | -5.405125 | 2.806752  | 4.177013  |
| C  | -4.827666 | 2.756173  | -3.048458 | C | -3.684191 | 2.836390  | 2.872939  |
| H  | -5.328553 | 3.492993  | -3.671861 | H | -3.330528 | 3.816044  | 3.182058  |
| N  | 2.688016  | 2.211387  | 0.165338  | C | -2.985061 | 2.118810  | 1.909543  |
| C  | -3.536134 | 2.985595  | -2.593596 | H | -2.080599 | 2.510793  | 1.446083  |
| H  | -3.007454 | 3.898221  | -2.858423 | C | 0.918611  | 0.265139  | 3.019239  |
| N  | -2.213630 | -1.980581 | -1.261070 | H | 0.047260  | 0.717403  | 2.553702  |
| C  | -2.908231 | 2.025928  | -1.798298 | C | 0.997233  | 0.042182  | 4.388198  |
| N  | -4.018533 | -1.456973 | 0.554127  | H | 0.175311  | 0.341302  | 5.032183  |
| C  | -1.547531 | 2.142796  | -1.307418 | C | 2.134139  | -0.568877 | 4.905133  |
| N  | -3.375277 | 0.907745  | 1.489364  | H | 2.227176  | -0.759275 | 5.971466  |
| C  | -0.598015 | 3.165702  | -1.333563 | C | 3.156960  | -0.938428 | 4.037669  |
| H  | -0.701305 | 4.157956  | -1.755517 | H | 4.052070  | -1.420877 | 4.421488  |
| N  | 1.901879  | -0.084964 | 2.179301  | C | 3.026047  | -0.691268 | 2.675119  |
| C  | 0.515310  | 2.618507  | -0.692603 | C | 4.055138  | -1.035558 | 1.681728  |
| N  | 3.713661  | -0.710330 | 0.406978  | C | 5.283011  | -1.611802 | 1.939604  |
| C  | 1.834246  | 3.130157  | -0.367245 | H | 5.598017  | -1.887452 | 2.941913  |
| N  | 2.750673  | 0.094080  | -1.885481 | C | 6.167522  | -1.861276 | 0.868962  |
| C  | 2.219140  | 4.459857  | -0.543966 | C | 5.791571  | -1.498033 | -0.438715 |
| H  | 1.519073  | 5.173592  | -0.971830 | H | 6.463412  | -1.669491 | -1.273541 |
| C  | 3.491612  | 4.858866  | -0.157425 | C | 4.544398  | -0.920238 | -0.639499 |
| H  | 3.804662  | 5.892381  | -0.284871 | C | 3.999047  | -0.465501 | -1.930577 |
| C  | 4.356440  | 3.919829  | 0.402673  | C | 4.685274  | -0.566954 | -3.138031 |
| H  | 5.355740  | 4.193939  | 0.728465  | H | 5.676485  | -1.011790 | -3.167775 |
| C  | 3.915065  | 2.612123  | 0.539170  | C | 4.098920  | -0.096694 | -4.308352 |
| H  | 4.558263  | 1.842522  | 0.965735  | H | 4.629744  | -0.171673 | -5.254228 |
| C  | -1.243812 | -2.174304 | -2.163864 | C | 2.829546  | 0.469212  | -4.248767 |
| H  | -0.502233 | -1.382768 | -2.228300 | H | 2.337048  | 0.849446  | -5.139393 |
| C  | -1.176762 | -3.321836 | -2.945241 | C | 2.191234  | 0.544573  | -3.016792 |
| H  | -0.371647 | -3.438491 | -3.664890 | H | 1.197789  | 0.978804  | -2.911706 |
| C  | -2.146797 | -4.303939 | -2.781894 | O | 7.316856  | -2.425024 | 1.198720  |
| H  | -2.122823 | -5.214015 | -3.376122 | C | 8.277288  | -2.721037 | 0.172683  |
| C  | -3.154180 | -4.110620 | -1.841385 | H | 8.606791  | -1.799812 | -0.320260 |
| H  | -3.918452 | -4.869565 | -1.695547 | H | 9.115840  | -3.182969 | 0.691309  |
| C  | -3.173513 | -2.942826 | -1.085365 | H | 7.855841  | -3.424173 | -0.553941 |
| C  | -4.197700 | -2.642431 | -0.075379 | H | -7.049090 | -3.572725 | 1.499699  |

### Min-1 (3+ quintet)

**E= -2658.839 98 a.u.**

|    |           |           |           |   |           |           |           |
|----|-----------|-----------|-----------|---|-----------|-----------|-----------|
| Ru | -2.440478 | -0.359993 | 0.021401  | C | -5.316698 | -3.427105 | -0.036127 |
| Ru | 1.933526  | 0.091478  | 0.094599  | H | -5.488212 | -4.340779 | -0.598581 |
| N  | -3.533094 | 0.994394  | -1.380308 | C | -6.206667 | -3.044345 | 0.964853  |
| O  | -1.367200 | -1.125398 | 1.188497  | C | -6.001992 | -1.867974 | 1.683562  |
| O  | 1.081650  | -1.379783 | -0.365829 | H | -6.705842 | -1.571775 | 2.456521  |
| C  | -4.776745 | 0.823678  | -1.860900 | C | -4.884988 | -1.086344 | 1.393592  |
| H  | -5.241608 | -0.139730 | -1.652054 | C | -4.517675 | 0.188699  | 2.027469  |
| N  | -1.017027 | 1.102464  | -0.577632 | C | -5.261278 | 0.786519  | 3.042330  |
| C  | -5.447341 | 1.798801  | -2.583516 | H | -6.161141 | 0.305455  | 3.416983  |
| H  | -6.449515 | 1.607408  | -2.956125 | C | -4.847104 | 2.002923  | 3.575519  |
| N  | 0.236920  | 1.352172  | -0.179419 | H | -5.422512 | 2.476413  | 4.367231  |
| C  | -4.806088 | 3.015198  | -2.813356 | C | -3.691689 | 2.599972  | 3.081869  |
| H  | -5.302855 | 3.805423  | -3.371189 | H | -3.334919 | 3.549330  | 3.471421  |
| N  | 2.680670  | 2.177820  | 0.405613  | C | -2.989176 | 1.957812  | 2.068970  |
| C  | -3.518931 | 3.203506  | -2.328006 | H | -2.078121 | 2.379264  | 1.646213  |
| H  | -2.989668 | 4.137078  | -2.503799 | C | 0.920336  | -0.078065 | 3.030750  |
| N  | -2.220458 | -1.873309 | -1.424280 | H | 0.044727  | 0.415121  | 2.617671  |
| C  | -2.896053 | 2.175697  | -1.618478 | C | 1.000961  | -0.448459 | 4.367320  |
| N  | -4.030734 | -1.489938 | 0.423531  | H | 0.177479  | -0.225783 | 5.039618  |
| C  | -1.539717 | 2.247205  | -1.107465 | C | 2.140982  | -1.106503 | 4.814776  |
| N  | -3.383332 | 0.787277  | 1.549647  | H | 2.235366  | -1.411805 | 5.853928  |
| C  | -0.592328 | 3.269327  | -1.026166 | C | 3.165269  | -1.373844 | 3.912235  |
| H  | -0.693746 | 4.297201  | -1.352473 | H | 4.063274  | -1.890431 | 4.240918  |
| N  | 1.905012  | -0.329364 | 2.157435  | C | 3.032506  | -0.980068 | 2.584824  |
| C  | 0.515620  | 2.664980  | -0.428628 | C | 4.063735  | -1.208016 | 1.560772  |
| N  | 3.721277  | -0.746528 | 0.329096  | C | 5.294610  | -1.802502 | 1.755453  |
| C  | 1.830568  | 3.143933  | -0.042534 | H | 5.610088  | -2.185073 | 2.721874  |
| N  | 2.757386  | 0.303148  | -1.861517 | C | 6.181458  | -1.927336 | 0.665179  |
| C  | 2.215029  | 4.484831  | -0.084032 | C | 5.804217  | -1.424722 | -0.595174 |
| H  | 1.518197  | 5.236628  | -0.447156 | H | 6.477884  | -1.499325 | -1.442744 |
| C  | 3.482657  | 4.844722  | 0.353632  | C | 4.553923  | -0.835405 | -0.732915 |
| H  | 3.795357  | 5.885952  | 0.331671  | C | 4.007114  | -0.244660 | -1.966935 |
| C  | 4.342916  | 3.855870  | 0.828594  | C | 4.693285  | -0.212575 | -3.178246 |
| H  | 5.337916  | 4.097613  | 1.191122  | H | 5.685591  | -0.649061 | -3.256364 |
| C  | 3.902632  | 2.540697  | 0.830926  | C | 4.105387  | 0.380471  | -4.290568 |
| H  | 4.542493  | 1.733390  | 1.186995  | H | 4.636144  | 0.409738  | -5.239020 |
| C  | -1.251017 | -1.999517 | -2.339652 | C | 2.834668  | 0.933175  | -4.169959 |
| H  | -0.503916 | -1.210548 | -2.340058 | H | 2.340761  | 1.406166  | -5.014138 |
| C  | -1.189140 | -3.081609 | -3.210161 | C | 2.196069  | 0.872170  | -2.937193 |
| H  | -0.383765 | -3.143914 | -3.936234 | H | 1.200832  | 1.288242  | -2.785810 |
| C  | -2.163289 | -4.069516 | -3.125812 | O | 7.334305  | -2.516389 | 0.932642  |
| H  | -2.142540 | -4.929631 | -3.790381 | C | 8.297130  | -2.692320 | -0.118442 |
| C  | -3.170329 | -3.946507 | -2.173553 | H | 8.619756  | -1.720708 | -0.508490 |
| H  | -3.938239 | -4.711042 | -2.089121 | H | 9.139123  | -3.201292 | 0.347959  |
| C  | -3.184933 | -2.842370 | -1.327460 | H | 7.881233  | -3.315934 | -0.917263 |
| C  | -4.210952 | -2.620089 | -0.299694 | H | -7.071793 | -3.665343 | 1.183283  |

**Min-1 (4+ doublet)**

**E= -2658.350 35 a.u.**

|    |           |           |           |   |           |          |           |
|----|-----------|-----------|-----------|---|-----------|----------|-----------|
| Ru | -2.413244 | 0.218291  | -0.305911 | N | -3.542512 | 0.282386 | 1.606546  |
| Ru | 1.919538  | -0.119717 | -0.023144 | O | -1.237688 | 0.015616 | -1.544895 |



|   |           |           |           |   |           |           |           |
|---|-----------|-----------|-----------|---|-----------|-----------|-----------|
| O | 0.957218  | 1.053118  | -0.852415 | C | -6.100706 | 1.301095  | -3.051543 |
| C | -4.794747 | 0.747333  | 1.781358  | C | -5.877609 | -0.028313 | -2.690179 |
| H | -5.253135 | 1.230577  | 0.919469  | H | -6.540750 | -0.808961 | -3.053243 |
| N | -1.016771 | -0.337879 | 1.198118  | C | -4.799082 | -0.330125 | -1.861836 |
| C | -5.480728 | 0.625666  | 2.979956  | C | -4.427953 | -1.654371 | -1.346421 |
| H | -6.488995 | 1.020113  | 3.070932  | C | -5.136612 | -2.819709 | -1.623762 |
| N | 0.237013  | -0.804100 | 1.110760  | H | -6.006329 | -2.789660 | -2.275217 |
| C | -4.850646 | -0.010610 | 4.049597  | C | -4.731794 | -4.025800 | -1.056990 |
| H | -5.362351 | -0.128190 | 5.002073  | H | -5.284395 | -4.939298 | -1.264753 |
| N | 2.697365  | -1.714728 | 1.342254  | C | -3.619317 | -4.042809 | -0.220346 |
| C | -3.554517 | -0.485760 | 3.886291  | H | -3.275449 | -4.963048 | 0.244067  |
| H | -3.034648 | -0.971656 | 4.708576  | C | -2.944875 | -2.852301 | 0.021257  |
| N | -2.318048 | 2.312187  | -0.295795 | H | -2.069452 | -2.810108 | 0.667109  |
| C | -2.914482 | -0.322856 | 2.658785  | C | 1.061973  | -2.352960 | -2.012580 |
| N | -3.994565 | 0.674793  | -1.435597 | H | 0.183717  | -2.403429 | -1.373520 |
| C | -1.546996 | -0.731625 | 2.391109  | C | 1.206731  | -3.155071 | -3.137170 |
| N | -3.329768 | -1.687259 | -0.525111 | H | 0.432111  | -3.871710 | -3.394665 |
| C | -0.595476 | -1.474173 | 3.093659  | C | 2.351722  | -3.020227 | -3.916539 |
| H | -0.696627 | -1.927605 | 4.072301  | H | 2.495149  | -3.632094 | -4.804002 |
| N | 1.990511  | -1.455724 | -1.650055 | C | 3.318808  | -2.091473 | -3.544099 |
| C | 0.518288  | -1.496541 | 2.250122  | H | 4.221144  | -1.975451 | -4.138908 |
| N | 3.708506  | 0.292481  | -0.760725 | C | 3.125777  | -1.315671 | -2.405626 |
| C | 1.849026  | -2.072837 | 2.349091  | C | 4.098538  | -0.333119 | -1.910407 |
| N | 2.675077  | 1.229254  | 1.445251  | C | 5.318448  | -0.032760 | -2.474802 |
| C | 2.245571  | -2.951544 | 3.355273  | H | 5.668214  | -0.501749 | -3.390325 |
| H | 1.550494  | -3.220450 | 4.147185  | C | 6.155594  | 0.925275  | -1.853698 |
| C | 3.527788  | -3.488644 | 3.325749  | C | 5.734221  | 1.534911  | -0.648512 |
| H | 3.851954  | -4.178878 | 4.101144  | H | 6.370948  | 2.257687  | -0.147697 |
| C | 4.385465  | -3.137255 | 2.284865  | C | 4.498404  | 1.196811  | -0.123665 |
| H | 5.390909  | -3.543710 | 2.219184  | C | 3.916654  | 1.712806  | 1.126780  |
| C | 3.932818  | -2.247795 | 1.320819  | C | 4.562094  | 2.610687  | 1.971840  |
| H | 4.573574  | -1.941225 | 0.494973  | H | 5.547703  | 2.991433  | 1.716946  |
| C | -1.433273 | 3.078742  | 0.358562  | C | 3.945044  | 3.015887  | 3.152371  |
| H | -0.712172 | 2.544662  | 0.972255  | H | 4.446451  | 3.713074  | 3.819664  |
| C | -1.429631 | 4.463175  | 0.242502  | C | 2.686595  | 2.511640  | 3.466381  |
| H | -0.696937 | 5.049415  | 0.789703  | H | 2.175695  | 2.797536  | 4.381737  |
| C | -2.370454 | 5.073038  | -0.582051 | C | 2.086118  | 1.620283  | 2.585727  |
| H | -2.392782 | 6.154481  | -0.694410 | H | 1.105326  | 1.191284  | 2.785443  |
| C | -3.291219 | 4.280990  | -1.262894 | O | 7.291129  | 1.162539  | -2.462960 |
| H | -4.035147 | 4.741463  | -1.908071 | C | 8.228262  | 2.123684  | -1.925746 |
| C | -3.256031 | 2.898737  | -1.109465 | H | 8.573561  | 1.798808  | -0.939285 |
| C | -4.203202 | 1.978933  | -1.745886 | H | 9.058961  | 2.128211  | -2.629163 |
| C | -5.272793 | 2.315852  | -2.574151 | H | 7.765523  | 3.114581  | -1.883933 |
| H | -5.466369 | 3.350386  | -2.845053 | H | -6.936537 | 1.549009  | -3.701812 |

### Min-1 (4+ quartet)

E= -2658.356 49 a.u.

|    |           |           |           |   |           |           |          |
|----|-----------|-----------|-----------|---|-----------|-----------|----------|
| Ru | -2.435905 | 0.151461  | -0.331181 | H | -5.298771 | 1.324359  | 0.696564 |
| Ru | 1.924354  | -0.083043 | -0.027548 | N | -1.005169 | -0.048899 | 1.238289 |
| N  | -3.551631 | 0.599727  | 1.542493  | C | -5.482014 | 1.182839  | 2.844348 |
| O  | -1.271263 | -0.319574 | -1.519954 | H | -6.500689 | 1.559972  | 2.865883 |
| O  | 0.961852  | 0.876630  | -1.076376 | N | 0.252941  | -0.517019 | 1.243851 |
| C  | -4.815020 | 1.055566  | 1.634898  | C | -4.818781 | 0.816531  | 4.014613 |

|   |           |           |           |   |           |           |           |
|---|-----------|-----------|-----------|---|-----------|-----------|-----------|
| H | -5.313731 | 0.898028  | 4.979596  | C | -4.417317 | -1.935090 | -0.939600 |
| N | 2.710592  | -1.365543 | 1.633224  | C | -5.111068 | -3.142022 | -0.955834 |
| C | -3.510860 | 0.351117  | 3.934006  | H | -5.986054 | -3.262222 | -1.589625 |
| H | -2.966516 | 0.071084  | 4.832765  | C | -4.684433 | -4.194771 | -0.150485 |
| N | -2.364904 | 2.202399  | -0.786432 | H | -5.225012 | -5.138516 | -0.153842 |
| C | -2.893713 | 0.255653  | 2.688196  | C | -3.565377 | -4.019337 | 0.658628  |
| N | -4.023871 | 0.328726  | -1.528036 | H | -3.204613 | -4.815447 | 1.304183  |
| C | -1.519344 | -0.178430 | 2.493720  | C | -2.907707 | -2.795614 | 0.634153  |
| N | -3.313573 | -1.777970 | -0.141311 | H | -2.028020 | -2.605142 | 1.247132  |
| C | -0.556656 | -0.746012 | 3.331853  | C | 1.023168  | -2.661959 | -1.508135 |
| H | -0.648149 | -0.982474 | 4.385058  | H | 0.137325  | -2.550480 | -0.888094 |
| N | 1.974776  | -1.734522 | -1.330459 | C | 1.156510  | -3.686907 | -2.436595 |
| C | 0.549629  | -0.944018 | 2.503441  | H | 0.362865  | -4.419698 | -2.550756 |
| N | 3.723916  | 0.125580  | -0.806604 | C | 2.312281  | -3.750452 | -3.208647 |
| C | 1.879053  | -1.489982 | 2.707769  | H | 2.445817  | -4.539139 | -3.945326 |
| N | 2.686447  | 1.536171  | 1.130123  | C | 3.303349  | -2.790036 | -3.025969 |
| C | 2.290100  | -2.132194 | 3.874471  | H | 4.214078  | -2.825833 | -3.618327 |
| H | 1.607799  | -2.215910 | 4.717034  | C | 3.121079  | -1.786426 | -2.080406 |
| C | 3.568015  | -2.674824 | 3.940444  | C | 4.113310  | -0.744132 | -1.788853 |
| H | 3.903228  | -3.183179 | 4.841551  | C | 5.346866  | -0.597130 | -2.381334 |
| C | 4.407344  | -2.567793 | 2.832169  | H | 5.696617  | -1.257928 | -3.169760 |
| H | 5.408354  | -2.990057 | 2.838327  | C | 6.199166  | 0.455088  | -1.964295 |
| C | 3.942326  | -1.904962 | 1.706305  | C | 5.778062  | 1.319116  | -0.924136 |
| H | 4.569894  | -1.793950 | 0.823128  | H | 6.426718  | 2.118932  | -0.580135 |
| C | -1.493017 | 3.110563  | -0.324656 | C | 4.528984  | 1.129210  | -0.361105 |
| H | -0.761191 | 2.737778  | 0.387930  | C | 3.942575  | 1.915851  | 0.736858  |
| C | -1.514922 | 4.435957  | -0.740125 | C | 4.594300  | 2.966772  | 1.374364  |
| H | -0.792158 | 5.141050  | -0.339613 | H | 5.590875  | 3.266037  | 1.060271  |
| C | -2.470839 | 4.833775  | -1.670030 | C | 3.967257  | 3.633958  | 2.423794  |
| H | -2.514587 | 5.863763  | -2.016147 | H | 4.472361  | 4.453525  | 2.929765  |
| C | -3.379345 | 3.895619  | -2.152097 | C | 2.693732  | 3.233867  | 2.816239  |
| H | -4.135114 | 4.190628  | -2.875521 | H | 2.174397  | 3.725163  | 3.634563  |
| C | -3.317204 | 2.581308  | -1.699742 | C | 2.087030  | 2.179797  | 2.143340  |
| C | -4.252516 | 1.529729  | -2.113693 | H | 1.093799  | 1.823717  | 2.411930  |
| C | -5.328997 | 1.663564  | -2.989491 | O | 7.346075  | 0.532278  | -2.589550 |
| H | -5.538701 | 2.611234  | -3.478285 | C | 8.302908  | 1.566835  | -2.259278 |
| C | -6.142766 | 0.557885  | -3.230483 | H | 8.631748  | 1.453198  | -1.221731 |
| C | -5.897363 | -0.657778 | -2.591683 | H | 9.138473  | 1.400938  | -2.936835 |
| H | -6.548149 | -1.508776 | -2.773865 | H | 7.862783  | 2.552626  | -2.437976 |
| C | -4.811718 | -0.756655 | -1.723676 | H | -6.983825 | 0.646623  | -3.914257 |

### TS-1 (3+ triplet)

E= -2658.814 88 a.u.

|    |           |           |           |   |           |           |           |
|----|-----------|-----------|-----------|---|-----------|-----------|-----------|
| Ru | -1.740221 | 0.274922  | -0.234232 | N | 1.105473  | 1.471083  | -0.275772 |
| N  | -2.652315 | 2.062813  | -1.154647 | C | -3.614723 | 4.460457  | -2.202005 |
| O  | -0.661252 | -0.837935 | 0.743659  | H | -3.989775 | 5.395517  | -2.610963 |
| O  | 0.784953  | -1.324353 | -0.096332 | N | 3.647334  | 1.463092  | 0.184184  |
| C  | -3.949965 | 2.206607  | -1.477425 | C | -2.273045 | 4.329435  | -1.871077 |
| H  | -4.581584 | 1.335775  | -1.304631 | H | -1.580412 | 5.155087  | -2.016415 |
| Ru | 2.201752  | -0.201632 | 0.232196  | N | -1.655010 | -0.817188 | -2.029219 |
| N  | -0.187542 | 1.599091  | -0.536984 | C | -1.807060 | 3.122522  | -1.348853 |
| C  | -4.471309 | 3.378345  | -2.004415 | N | -3.359515 | -0.874859 | -0.055841 |
| H  | -5.526680 | 3.438432  | -2.254289 | C | -0.428055 | 2.863144  | -0.981808 |

|   |           |           |           |   |           |           |           |
|---|-----------|-----------|-----------|---|-----------|-----------|-----------|
| N | -2.583380 | 0.999410  | 1.573070  | H | -4.510726 | 2.048309  | 4.762403  |
| C | 0.776289  | 3.577995  | -0.981305 | C | -2.839452 | 2.459329  | 3.456542  |
| H | 0.936533  | 4.609015  | -1.271688 | H | -2.476760 | 3.320476  | 4.011356  |
| N | 2.010672  | -0.167565 | 2.327565  | C | -2.179956 | 2.047685  | 2.305909  |
| C | 1.726803  | 2.658341  | -0.521415 | H | -1.298721 | 2.568751  | 1.933577  |
| N | 3.401993  | -1.711266 | 0.747148  | C | 1.291009  | 0.684263  | 3.069801  |
| C | 3.149398  | 2.666165  | -0.239893 | H | 0.773035  | 1.461165  | 2.511687  |
| N | 3.031193  | -0.734835 | -1.641212 | C | 1.212978  | 0.588895  | 4.452634  |
| C | 3.976086  | 3.783041  | -0.366975 | H | 0.624066  | 1.308523  | 5.014801  |
| H | 3.555321  | 4.727292  | -0.704487 | C | 1.910083  | -0.431637 | 5.091917  |
| C | 5.324944  | 3.676070  | -0.057232 | H | 1.876688  | -0.535027 | 6.173682  |
| H | 5.979144  | 4.539493  | -0.151249 | C | 2.661821  | -1.319146 | 4.328506  |
| C | 5.827177  | 2.449588  | 0.375825  | H | 3.216685  | -2.119355 | 4.811337  |
| H | 6.875598  | 2.324845  | 0.630972  | C | 2.704138  | -1.174778 | 2.944709  |
| C | 4.957201  | 1.374871  | 0.477002  | C | 3.482382  | -2.050772 | 2.055524  |
| H | 5.305865  | 0.397118  | 0.808106  | C | 4.261031  | -3.141672 | 2.433272  |
| C | -0.750808 | -0.703290 | -3.011463 | H | 4.344321  | -3.435280 | 3.476159  |
| H | 0.002531  | 0.066459  | -2.859425 | C | 4.932622  | -3.864338 | 1.447300  |
| C | -0.770876 | -1.505765 | -4.143327 | H | 5.540207  | -4.721331 | 1.726527  |
| H | -0.020384 | -1.371738 | -4.917662 | C | 4.831741  | -3.494922 | 0.109178  |
| C | -1.770768 | -2.466213 | -4.263020 | H | 5.358241  | -4.061455 | -0.654084 |
| H | -1.821365 | -3.110745 | -5.137128 | C | 4.046137  | -2.392231 | -0.229247 |
| C | -2.715565 | -2.588671 | -3.249589 | C | 3.855992  | -1.826639 | -1.569886 |
| H | -3.506912 | -3.329596 | -3.327095 | C | 4.504654  | -2.303869 | -2.708036 |
| C | -2.646393 | -1.755673 | -2.136818 | H | 5.155869  | -3.171536 | -2.639625 |
| C | -3.607165 | -1.798503 | -1.021319 | C | 4.331506  | -1.655998 | -3.925184 |
| C | -4.682468 | -2.654341 | -0.899968 | H | 4.838838  | -2.018799 | -4.815658 |
| H | -4.918004 | -3.405868 | -1.648096 | C | 3.517240  | -0.527724 | -3.978844 |
| C | -5.510214 | -2.565375 | 0.241091  | H | 3.374837  | 0.023705  | -4.904451 |
| C | -5.229064 | -1.601037 | 1.226297  | C | 2.888600  | -0.102752 | -2.816001 |
| H | -5.852281 | -1.517389 | 2.110893  | H | 2.249442  | 0.779484  | -2.800342 |
| C | -4.133946 | -0.763024 | 1.047056  | O | -6.513773 | -3.425567 | 0.283031  |
| C | -3.708339 | 0.315644  | 1.952837  | C | -7.408519 | -3.409084 | 1.406063  |
| C | -4.405304 | 0.679989  | 3.103118  | H | -7.919072 | -2.442166 | 1.474257  |
| H | -5.297018 | 0.131760  | 3.395792  | H | -8.133336 | -4.196494 | 1.205612  |
| C | -3.968222 | 1.755928  | 3.866785  | H | -6.865004 | -3.629903 | 2.331270  |

### TS-1 (4+ quartet)

E= -2658.332 91 a.u.

|    |           |           |           |   |           |           |           |
|----|-----------|-----------|-----------|---|-----------|-----------|-----------|
| Ru | 1.744585  | -0.258705 | 0.222924  | C | 2.272552  | -2.590469 | 3.899045  |
| N  | 2.647236  | -1.460632 | 1.803628  | H | 1.584452  | -2.885528 | 4.687757  |
| O  | 0.571763  | 0.847212  | -0.719913 | N | 1.807406  | -1.875232 | -1.112893 |
| O  | -0.701464 | 0.076788  | -1.273963 | C | 1.803580  | -1.849641 | 2.814516  |
| C  | 3.943472  | -1.817479 | 1.870248  | N | 3.378982  | 0.177538  | -0.830199 |
| H  | 4.574869  | -1.488803 | 1.046267  | C | 0.424946  | -1.441246 | 2.630526  |
| Ru | -2.204001 | 0.243106  | -0.180972 | N | 2.508911  | 1.422929  | 1.274724  |
| N  | 0.184850  | -0.791537 | 1.452840  | C | -0.771287 | -1.520994 | 3.352967  |
| C  | 4.463368  | -2.559948 | 2.921037  | H | -0.930593 | -1.973085 | 4.324320  |
| H  | 5.517700  | -2.822637 | 2.926251  | N | -2.149449 | 2.320646  | 0.135718  |
| N  | -1.095511 | -0.454719 | 1.399977  | C | -1.716429 | -0.886569 | 2.536747  |
| C  | 3.613297  | -2.949890 | 3.955513  | N | -3.422767 | 0.890576  | -1.636233 |
| H  | 3.991774  | -3.529145 | 4.794453  | C | -3.138265 | -0.605554 | 2.581061  |
| N  | -3.634871 | -0.029113 | 1.437537  | N | -2.969529 | -1.585109 | -0.946644 |

|   |           |           |           |   |           |           |           |
|---|-----------|-----------|-----------|---|-----------|-----------|-----------|
| C | -3.965256 | -0.867919 | 3.672771  | H | 1.172510  | 1.446261  | 2.847942  |
| H | -3.548551 | -1.326381 | 4.566534  | C | -1.532968 | 2.976450  | 1.131227  |
| C | -5.312142 | -0.532516 | 3.609020  | H | -1.018727 | 2.349596  | 1.856466  |
| H | -5.967715 | -0.729602 | 4.453987  | C | -1.554502 | 4.360512  | 1.237559  |
| C | -5.808509 | 0.061593  | 2.449144  | H | -1.049962 | 4.849000  | 2.066738  |
| H | -6.854895 | 0.340443  | 2.359721  | C | -2.242862 | 5.095493  | 0.276364  |
| C | -4.941132 | 0.291873  | 1.390419  | H | -2.285009 | 6.180837  | 0.330925  |
| H | -5.291183 | 0.746483  | 0.464905  | C | -2.895304 | 4.421754  | -0.752884 |
| C | 0.986606  | -2.937630 | -1.135577 | H | -3.450493 | 4.980077  | -1.502269 |
| H | 0.220209  | -2.952644 | -0.363833 | C | -2.846559 | 3.032138  | -0.808128 |
| C | 1.106476  | -3.949485 | -2.077154 | C | -3.550245 | 2.227988  | -1.816467 |
| H | 0.425334  | -4.795839 | -2.053884 | C | -4.322345 | 2.703962  | -2.873669 |
| C | 2.116823  | -3.860723 | -3.031462 | H | -4.443715 | 3.770350  | -3.044135 |
| H | 2.242982  | -4.638117 | -3.781420 | C | -4.944685 | 1.786108  | -3.720151 |
| C | 2.977901  | -2.767540 | -3.006841 | H | -5.548439 | 2.142807  | -4.551398 |
| H | 3.780280  | -2.689294 | -3.735897 | C | -4.806494 | 0.416109  | -3.504269 |
| C | 2.815539  | -1.782952 | -2.037368 | H | -5.302410 | -0.291145 | -4.163647 |
| C | 3.699252  | -0.617406 | -1.891807 | C | -4.026554 | -0.022486 | -2.434663 |
| C | 4.775919  | -0.303553 | -2.690645 | C | -3.795829 | -1.413740 | -2.027007 |
| H | 5.064123  | -0.907431 | -3.546718 | C | -4.402334 | -2.509239 | -2.637697 |
| C | 5.544528  | 0.850445  | -2.398556 | H | -5.058198 | -2.364705 | -3.492523 |
| C | 5.199652  | 1.645984  | -1.281983 | C | -4.183676 | -3.788776 | -2.136370 |
| H | 5.784252  | 2.526588  | -1.033841 | H | -4.662255 | -4.647576 | -2.601267 |
| C | 4.104816  | 1.281334  | -0.514571 | C | -3.362424 | -3.947279 | -1.023138 |
| C | 3.622872  | 1.968994  | 0.693420  | H | -3.186002 | -4.926630 | -0.586059 |
| C | 4.251128  | 3.071209  | 1.266810  | C | -2.776696 | -2.820876 | -0.458979 |
| H | 5.135971  | 3.498851  | 0.802523  | H | -2.135503 | -2.889918 | 0.419158  |
| C | 3.754435  | 3.614664  | 2.447806  | O | 6.546243  | 1.080646  | -3.211774 |
| H | 4.246047  | 4.469846  | 2.905734  | C | 7.406306  | 2.226028  | -3.014220 |
| C | 2.634518  | 3.036976  | 3.039412  | H | 7.915352  | 2.149299  | -2.048375 |
| H | 2.229156  | 3.417353  | 3.973291  | H | 8.131969  | 2.174674  | -3.823930 |
| C | 2.043291  | 1.942398  | 2.421587  | H | 6.823141  | 3.149142  | -3.089240 |

### Min-2 (3+ triplet)

E= -2658.821 22 a.u.

|    |           |           |           |   |           |           |           |
|----|-----------|-----------|-----------|---|-----------|-----------|-----------|
| Ru | -2.183046 | 0.110179  | 0.247457  | N | -3.259400 | 1.382909  | 1.349543  |
| N  | -3.675097 | -1.268496 | -0.487617 | C | -1.783669 | -2.280069 | -1.489384 |
| O  | -0.603660 | 1.233797  | 0.440333  | N | -2.888613 | 1.451476  | -1.214280 |
| O  | 0.553597  | 0.609732  | 0.944889  | C | -0.838404 | -3.059055 | -2.168595 |
| C  | -4.996484 | -1.180518 | -0.246836 | H | -1.017193 | -3.925485 | -2.793277 |
| H  | -5.308804 | -0.354327 | 0.390423  | N | 1.695809  | 1.226459  | -1.805472 |
| Ru | 1.727490  | -0.276932 | -0.332368 | C | 0.390527  | -2.463233 | -1.857369 |
| N  | -1.134558 | -1.278298 | -0.829000 | N | 3.300283  | 0.825943  | 0.215005  |
| C  | -5.916908 | -2.078023 | -0.764679 | C | 1.783210  | -2.653702 | -2.206238 |
| H  | -6.972277 | -1.963719 | -0.534455 | N | 2.508338  | -1.396547 | 1.274838  |
| N  | 0.167620  | -1.401720 | -1.031112 | C | 2.265757  | -3.657445 | -3.046833 |
| C  | -5.457663 | -3.114483 | -1.577208 | H | 1.569703  | -4.367077 | -3.487777 |
| H  | -6.153266 | -3.834864 | -2.000688 | C | 3.625738  | -3.736779 | -3.311073 |
| N  | 2.633894  | -1.740962 | -1.635642 | H | 4.012970  | -4.513871 | -3.965509 |
| C  | -4.099040 | -3.214755 | -1.841093 | C | 4.485950  | -2.808372 | -2.725458 |
| H  | -3.710853 | -4.010949 | -2.471869 | H | 5.556646  | -2.835629 | -2.906427 |
| N  | -2.082189 | -0.811231 | 2.136668  | C | 3.950952  | -1.835102 | -1.896191 |
| C  | -3.218014 | -2.283499 | -1.289775 | H | 4.583781  | -1.090317 | -1.415623 |

|   |           |           |           |   |           |           |           |
|---|-----------|-----------|-----------|---|-----------|-----------|-----------|
| C | -1.499981 | -1.977749 | 2.449466  | H | 0.247932  | 2.403776  | -4.607587 |
| H | -1.044894 | -2.508356 | 1.614815  | C | 1.906126  | 3.351210  | -3.586651 |
| C | -1.488424 | -2.486113 | 3.741267  | H | 1.995342  | 4.180455  | -4.284119 |
| H | -1.014563 | -3.442731 | 3.944670  | C | 2.776057  | 3.250879  | -2.505793 |
| C | -2.109438 | -1.757023 | 4.750847  | H | 3.548392  | 4.000606  | -2.355033 |
| H | -2.127695 | -2.126623 | 5.773155  | C | 2.661994  | 2.180463  | -1.623538 |
| C | -2.722679 | -0.549076 | 4.433884  | C | 3.552904  | 1.973358  | -0.468365 |
| H | -3.221694 | 0.028070  | 5.207994  | C | 4.570312  | 2.811986  | -0.062001 |
| C | -2.704197 | -0.088175 | 3.120475  | H | 4.806606  | 3.736758  | -0.580619 |
| C | -3.346641 | 1.161104  | 2.683175  | C | 5.334946  | 2.470826  | 1.075849  |
| C | -4.006623 | 2.083148  | 3.490953  | C | 5.046660  | 1.283056  | 1.770314  |
| H | -4.091652 | 1.927168  | 4.562982  | H | 5.616195  | 1.005062  | 2.651356  |
| C | -4.555228 | 3.224271  | 2.905180  | C | 4.010754  | 0.476523  | 1.310278  |
| C | -4.446440 | 3.432866  | 1.534164  | C | 3.580893  | -0.803236 | 1.889903  |
| H | -4.872572 | 4.324095  | 1.081375  | C | 4.225674  | -1.427238 | 2.955673  |
| C | -3.781537 | 2.482114  | 0.757951  | H | 5.074940  | -0.945961 | 3.433771  |
| C | -3.599884 | 2.503080  | -0.696033 | C | 3.794373  | -2.673464 | 3.393379  |
| C | -4.153196 | 3.472099  | -1.531498 | H | 4.297247  | -3.168919 | 4.220102  |
| H | -4.713379 | 4.300793  | -1.105937 | C | 2.723958  | -3.280720 | 2.743145  |
| C | -4.006217 | 3.362789  | -2.908722 | H | 2.369777  | -4.265552 | 3.035880  |
| H | -4.441557 | 4.109924  | -3.567577 | C | 2.113039  | -2.609522 | 1.692697  |
| C | -3.314051 | 2.271371  | -3.427005 | H | 1.279430  | -3.044791 | 1.144071  |
| H | -3.200140 | 2.131747  | -4.498788 | O | 6.287309  | 3.330560  | 1.398924  |
| C | -2.773568 | 1.343374  | -2.547604 | C | 7.115844  | 3.062937  | 2.540356  |
| H | -2.232197 | 0.467401  | -2.901458 | H | 7.809069  | 3.900892  | 2.593797  |
| C | 0.866206  | 1.327286  | -2.853971 | H | 6.509580  | 3.022388  | 3.452053  |
| H | 0.137390  | 0.523980  | -2.947099 | H | 7.671103  | 2.129037  | 2.399487  |
| C | 0.934770  | 2.370968  | -3.766057 | H | -5.069631 | 3.954596  | 3.524405  |

### Min-2 (4+ doublet)

E= -2658.341 79 a.u.

|    |           |           |           |   |           |           |           |
|----|-----------|-----------|-----------|---|-----------|-----------|-----------|
| Ru | 2.242656  | -0.055278 | -0.241708 | H | 0.983605  | -0.606605 | 4.735061  |
| N  | 3.703917  | -0.351410 | 1.280888  | N | -1.885832 | 2.123275  | 0.376713  |
| O  | 0.554391  | 0.539638  | -1.098422 | C | -0.401471 | -0.348917 | 2.996083  |
| O  | -0.460690 | -0.363880 | -0.984716 | N | -3.393576 | 0.325781  | -0.760354 |
| C  | 5.033301  | -0.393614 | 1.075368  | C | -1.800504 | -0.314201 | 3.356810  |
| H  | 5.362888  | -0.281649 | 0.043942  | N | -2.443671 | -1.964621 | -0.008443 |
| Ru | -1.783911 | 0.013642  | 0.340637  | C | -2.296901 | -0.439144 | 4.654329  |
| N  | 1.142410  | -0.240804 | 1.457855  | H | -1.604569 | -0.558358 | 5.484358  |
| C  | 5.942155  | -0.574084 | 2.109133  | C | -3.668708 | -0.414909 | 4.870129  |
| H  | 7.006064  | -0.605981 | 1.890443  | H | -4.069165 | -0.510310 | 5.876645  |
| N  | -0.169745 | -0.218135 | 1.662645  | C | -4.521841 | -0.270313 | 3.776857  |
| C  | 5.463755  | -0.711213 | 3.411342  | H | -5.601021 | -0.242348 | 3.900786  |
| H  | 6.151582  | -0.852602 | 4.241680  | C | -3.975384 | -0.152879 | 2.506673  |
| N  | -2.646009 | -0.160730 | 2.287258  | H | -4.608335 | -0.032566 | 1.629918  |
| C  | 4.093026  | -0.663221 | 3.636193  | C | 2.048708  | -3.139743 | -0.087386 |
| H  | 3.690564  | -0.765593 | 4.641296  | H | 1.609514  | -2.919173 | 0.883817  |
| N  | 2.443614  | -2.072948 | -0.805654 | C | 2.201223  | -4.440591 | -0.544468 |
| C  | 3.224847  | -0.481798 | 2.560539  | H | 1.880213  | -5.273635 | 0.075236  |
| N  | 3.322413  | 0.074824  | -1.946545 | C | 2.792674  | -4.649953 | -1.788450 |
| C  | 1.780918  | -0.409360 | 2.661355  | H | 2.938034  | -5.657148 | -2.172110 |
| N  | 2.847793  | 1.960869  | -0.251889 | C | 3.219045  | -3.551685 | -2.529166 |
| C  | 0.823044  | -0.479262 | 3.671431  | H | 3.700853  | -3.697436 | -3.492650 |

|   |           |           |           |   |           |           |           |
|---|-----------|-----------|-----------|---|-----------|-----------|-----------|
| C | 3.045826  | -2.267202 | -2.021503 | H | -3.947738 | 4.381605  | -1.071348 |
| C | 3.520614  | -1.046833 | -2.680676 | C | -2.911024 | 2.622821  | -0.382670 |
| C | 4.154526  | -0.962254 | -3.918072 | C | -3.751394 | 1.614031  | -1.047961 |
| H | 4.326331  | -1.851436 | -4.518922 | C | -4.827288 | 1.863610  | -1.867592 |
| C | 4.573481  | 0.285241  | -4.379936 | H | -5.148220 | 2.870514  | -2.119925 |
| C | 4.373884  | 1.422280  | -3.602623 | C | -5.556286 | 0.775583  | -2.413860 |
| H | 4.714971  | 2.391918  | -3.955601 | C | -5.171551 | -0.544983 | -2.093658 |
| C | 3.738641  | 1.293647  | -2.366702 | H | -5.715382 | -1.391032 | -2.502423 |
| C | 3.496388  | 2.357344  | -1.392051 | C | -4.083790 | -0.739591 | -1.258146 |
| C | 3.946116  | 3.668591  | -1.534371 | C | -3.555793 | -2.033482 | -0.806412 |
| H | 4.460651  | 3.972348  | -2.442538 | C | -4.139151 | -3.261465 | -1.109689 |
| C | 3.760338  | 4.578088  | -0.499220 | H | -5.022266 | -3.306809 | -1.741853 |
| H | 4.120115  | 5.599657  | -0.596882 | C | -3.597934 | -4.431821 | -0.587518 |
| C | 3.132183  | 4.152895  | 0.669416  | H | -4.051651 | -5.393903 | -0.813165 |
| H | 2.994938  | 4.824343  | 1.513015  | C | -2.479015 | -4.347473 | 0.235804  |
| C | 2.691948  | 2.839221  | 0.753667  | H | -2.036580 | -5.236039 | 0.678116  |
| H | 2.204759  | 2.454330  | 1.647866  | C | -1.933478 | -3.096514 | 0.498470  |
| C | -1.105569 | 2.973392  | 1.063271  | H | -1.063259 | -2.974256 | 1.140970  |
| H | -0.325636 | 2.510156  | 1.665008  | O | -6.559031 | 1.106648  | -3.189171 |
| C | -1.283852 | 4.349354  | 1.022336  | C | -7.387774 | 0.088997  | -3.797257 |
| H | -0.637623 | 4.998685  | 1.606953  | H | -8.127642 | 0.639030  | -4.375906 |
| C | -2.312072 | 4.868901  | 0.240674  | H | -6.782636 | -0.538870 | -4.458649 |
| H | -2.485739 | 5.941257  | 0.190435  | H | -7.881407 | -0.503606 | -3.020829 |
| C | -3.131664 | 3.993841  | -0.467049 | H | 5.067294  | 0.367577  | -5.345116 |

### Min-2 (4+ quartet)

E= -2658.334 08 a.u.

|    |           |           |           |   |           |           |           |
|----|-----------|-----------|-----------|---|-----------|-----------|-----------|
| Ru | -2.200668 | 0.240540  | -0.155030 | C | 1.790193  | -1.999517 | 2.749171  |
| N  | -3.650654 | -0.190805 | 1.389170  | N | 2.454232  | 1.388257  | 1.343197  |
| O  | -0.613286 | 0.202091  | -1.252835 | C | 2.258075  | -2.795547 | 3.794888  |
| O  | 0.518226  | 0.880161  | -0.678700 | H | 1.564850  | -3.148439 | 4.554877  |
| C  | -4.961600 | 0.103717  | 1.334297  | C | 3.604529  | -3.133848 | 3.849574  |
| H  | -5.303791 | 0.607341  | 0.431651  | H | 3.982938  | -3.754799 | 4.658082  |
| Ru | 1.740570  | -0.283305 | 0.250906  | C | 4.459842  | -2.666428 | 2.852816  |
| N  | -1.104621 | -0.556189 | 1.376117  | H | 5.519341  | -2.907745 | 2.858181  |
| C  | -5.845478 | -0.214766 | 2.357969  | C | 3.940736  | -1.870585 | 1.839752  |
| H  | -6.896247 | 0.045096  | 2.261986  | H | 4.577710  | -1.479658 | 1.048080  |
| N  | 0.178407  | -0.875850 | 1.429858  | C | -1.636807 | 2.874069  | 1.403216  |
| C  | -5.361246 | -0.873274 | 3.487155  | H | -1.138383 | 2.199123  | 2.095862  |
| H  | -6.029823 | -1.140485 | 4.302094  | C | -1.695460 | 4.243316  | 1.625120  |
| N  | 2.639912  | -1.534225 | 1.775666  | H | -1.237541 | 4.669453  | 2.513637  |
| C  | -4.008574 | -1.184119 | 3.557750  | C | -2.362602 | 5.043039  | 0.701389  |
| H  | -3.600004 | -1.693056 | 4.427702  | H | -2.434571 | 6.118490  | 0.845947  |
| N  | -2.195979 | 2.291609  | 0.330906  | C | -2.955141 | 4.445584  | -0.407944 |
| C  | -3.165242 | -0.831188 | 2.503994  | H | -3.493141 | 5.053835  | -1.130549 |
| N  | -3.362869 | 0.992193  | -1.607335 | C | -2.869692 | 3.067012  | -0.578052 |
| C  | -1.738725 | -1.078915 | 2.471141  | C | -3.508401 | 2.338053  | -1.682529 |
| N  | -2.886158 | -1.516314 | -1.113038 | C | -4.234691 | 2.890320  | -2.734719 |
| C  | -0.796971 | -1.751489 | 3.260980  | H | -4.368103 | 3.965438  | -2.820034 |
| H  | -0.965791 | -2.270599 | 4.196551  | C | -4.794383 | 2.039712  | -3.688695 |
| N  | 1.836227  | -1.840890 | -1.158285 | C | -4.636401 | 0.659613  | -3.584092 |
| C  | 0.409143  | -1.603735 | 2.569139  | H | -5.080845 | 0.002539  | -4.326858 |
| N  | 3.355685  | 0.235418  | -0.797188 | C | -3.903085 | 0.144125  | -2.515439 |

|   |           |           |           |   |           |           |           |
|---|-----------|-----------|-----------|---|-----------|-----------|-----------|
| C | -3.660688 | -1.271151 | -2.217750 | H | 5.045409  | -0.688834 | -3.570735 |
| C | -4.210161 | -2.322113 | -2.949178 | C | 5.481532  | 1.039404  | -2.361605 |
| H | -4.824777 | -2.116838 | -3.822011 | C | 5.118270  | 1.784648  | -1.217291 |
| C | -3.989643 | -3.634938 | -2.545556 | H | 5.672798  | 2.677273  | -0.944582 |
| H | -4.424801 | -4.460024 | -3.104590 | C | 4.043852  | 1.355725  | -0.454560 |
| C | -3.224142 | -3.871118 | -1.406421 | C | 3.546674  | 1.989200  | 0.775488  |
| H | -3.049926 | -4.880275 | -1.042207 | C | 4.142011  | 3.093590  | 1.378850  |
| C | -2.693372 | -2.786332 | -0.720534 | H | 5.010545  | 3.563098  | 0.924398  |
| H | -2.097856 | -2.918273 | 0.182100  | C | 3.634794  | 3.585344  | 2.577506  |
| C | 1.047170  | -2.925614 | -1.215723 | H | 4.101119  | 4.441372  | 3.059534  |
| H | 0.283160  | -2.990824 | -0.444025 | C | 2.537094  | 2.953715  | 3.155162  |
| C | 1.195635  | -3.903756 | -2.188628 | H | 2.124785  | 3.291241  | 4.102415  |
| H | 0.539607  | -4.770065 | -2.191848 | C | 1.978497  | 1.859225  | 2.507251  |
| C | 2.203041  | -3.756818 | -3.138538 | H | 1.127143  | 1.322640  | 2.923395  |
| H | 2.351917  | -4.506504 | -3.912137 | O | 6.468407  | 1.330407  | -3.173595 |
| C | 3.033020  | -2.641102 | -3.077513 | C | 7.292576  | 2.495755  | -2.942653 |
| H | 3.834661  | -2.517619 | -3.801170 | H | 8.017370  | 2.491958  | -3.754759 |
| C | 2.841846  | -1.692766 | -2.077352 | H | 6.680339  | 3.401798  | -2.988555 |
| C | 3.691839  | -0.508121 | -1.891800 | H | 7.806174  | 2.405805  | -1.980359 |
| C | 4.748197  | -0.128226 | -2.688753 | H | -5.362351 | 2.457271  | -4.516735 |

### TS-2 A (4+ doublet)

E= -2811.184 01 a.u.

|    |           |           |           |   |           |           |           |
|----|-----------|-----------|-----------|---|-----------|-----------|-----------|
| Ru | 1.677704  | 0.088295  | 0.295167  | C | -5.558114 | -0.240054 | 3.579724  |
| Ru | -2.436930 | -0.018368 | -0.212309 | H | -6.218177 | -0.283281 | 4.442786  |
| N  | 2.482084  | 0.543194  | 2.204324  | C | -6.075422 | -0.307391 | 2.286778  |
| O  | 0.219768  | 0.655829  | -0.938396 | H | -7.143142 | -0.401415 | 2.108754  |
| O  | -0.741237 | -0.281348 | -1.189892 | C | -5.200988 | -0.249265 | 1.211376  |
| C  | 3.791720  | 0.811077  | 2.400654  | H | -5.561911 | -0.294664 | 0.185402  |
| H  | 4.424962  | 0.818950  | 1.518825  | C | 1.268433  | -2.776364 | 1.501209  |
| N  | 0.016515  | 0.194450  | 1.626147  | H | 0.369777  | -2.332928 | 1.924986  |
| C  | 4.323207  | 1.049732  | 3.657148  | C | 1.595769  | -4.109578 | 1.713071  |
| H  | 5.386280  | 1.250984  | 3.756751  | H | 0.947047  | -4.738181 | 2.317197  |
| N  | -1.290274 | 0.014201  | 1.464000  | C | 2.770559  | -4.605626 | 1.157330  |
| C  | 3.481444  | 1.018702  | 4.769113  | H | 3.063588  | -5.641928 | 1.308342  |
| H  | 3.873016  | 1.197999  | 5.767576  | C | 3.579454  | -3.750671 | 0.414057  |
| N  | -3.869294 | -0.124886 | 1.366091  | H | 4.506939  | -4.118671 | -0.016653 |
| C  | 2.131868  | 0.763738  | 4.577392  | C | 3.199422  | -2.425606 | 0.232028  |
| H  | 1.441280  | 0.746496  | 5.417087  | C | 4.009392  | -1.437180 | -0.496729 |
| N  | 2.037916  | -1.953417 | 0.774326  | C | 5.239684  | -1.667828 | -1.070291 |
| C  | 1.645618  | 0.535774  | 3.289553  | H | 5.709024  | -2.647666 | -1.062459 |
| N  | 3.471795  | -0.183944 | -0.523368 | C | 5.940416  | -0.599588 | -1.681117 |
| C  | 0.261734  | 0.322671  | 2.957915  | C | 5.383743  | 0.694574  | -1.649449 |
| N  | 2.232010  | 2.050962  | -0.249032 | H | 5.914125  | 1.536724  | -2.083128 |
| C  | -0.940568 | 0.236374  | 3.671503  | C | 4.141821  | 0.869624  | -1.059548 |
| H  | -1.084444 | 0.314000  | 4.742223  | C | 3.431962  | 2.141928  | -0.898473 |
| N  | -2.792962 | 2.058826  | -0.368182 | C | 3.921211  | 3.378067  | -1.314677 |
| C  | -1.907521 | 0.044918  | 2.684935  | H | 4.875419  | 3.442687  | -1.831306 |
| N  | -3.623207 | 0.080346  | -1.838252 | C | 3.187838  | 4.531361  | -1.057638 |
| C  | -3.352698 | -0.066989 | 2.635047  | H | 3.563822  | 5.501401  | -1.373931 |
| N  | -2.841437 | -2.047254 | -0.594514 | C | 1.973703  | 4.423943  | -0.384556 |
| C  | -4.184508 | -0.120487 | 3.752419  | H | 1.376354  | 5.302450  | -0.156388 |
| H  | -3.751830 | -0.072679 | 4.748966  | C | 1.529769  | 3.165485  | -0.000618 |

|   |           |           |           |   |           |           |           |
|---|-----------|-----------|-----------|---|-----------|-----------|-----------|
| H | 0.585551  | 3.015959  | 0.517657  | C | -3.910104 | -3.571226 | -2.114151 |
| C | -2.402383 | 3.010492  | 0.497518  | H | -4.488300 | -3.739801 | -3.019165 |
| H | -1.845085 | 2.660434  | 1.365590  | C | -3.528162 | -4.646658 | -1.319921 |
| C | -2.698815 | 4.353869  | 0.313154  | H | -3.798336 | -5.660833 | -1.604152 |
| H | -2.377304 | 5.086126  | 1.049138  | C | -2.813976 | -4.401067 | -0.149760 |
| C | -3.435253 | 4.729448  | -0.807809 | H | -2.514890 | -5.212018 | 0.508789  |
| H | -3.696340 | 5.771348  | -0.978167 | C | -2.492243 | -3.090560 | 0.176414  |
| C | -3.855174 | 3.748554  | -1.701308 | H | -1.943408 | -2.843098 | 1.082575  |
| H | -4.446573 | 4.022349  | -2.571302 | O | 1.556742  | -1.568900 | -1.905107 |
| C | -3.533964 | 2.414531  | -1.464871 | H | 2.075110  | -1.266335 | -2.691093 |
| C | -3.985361 | 1.299562  | -2.307643 | H | 0.624593  | -1.494844 | -2.160794 |
| C | -4.746809 | 1.393492  | -3.469871 | H | 3.088921  | -0.317937 | -4.672062 |
| H | -5.051838 | 2.360193  | -3.861647 | O | 3.313676  | -0.898670 | -3.930416 |
| C | -5.123126 | 0.223100  | -4.129424 | H | 3.622002  | -1.710099 | -4.361493 |
| H | -5.716754 | 0.281511  | -5.038467 | O | 7.095476  | -0.917553 | -2.219820 |
| C | -4.755263 | -1.018346 | -3.619524 | C | 7.915687  | 0.100755  | -2.83207  |
| H | -5.065065 | -1.929385 | -4.124611 | H | 8.79565   | -0.42635  | -3.19666  |
| C | -3.996119 | -1.070378 | -2.449315 | H | 7.380871  | 0.563124  | -3.66796  |
| C | -3.568018 | -2.274554 | -1.735043 | H | 8.208396  | 0.846235  | -2.08591  |

### TS-2 B (4+ doublet)

E= -2811.183 30 a.u.

|    |           |           |           |   |           |           |           |
|----|-----------|-----------|-----------|---|-----------|-----------|-----------|
| Ru | -2.174757 | 0.109470  | 0.068791  | H | 4.456671  | -4.455464 | -3.720585 |
| Ru | 1.942879  | -0.265122 | -0.230826 | C | 4.840543  | -2.897736 | -2.272721 |
| N  | -3.450474 | -0.812191 | -1.343814 | H | 5.920702  | -3.014956 | -2.271398 |
| O  | -0.476634 | 1.141682  | 0.270212  | C | 4.252721  | -1.936733 | -1.464007 |
| O  | 0.522861  | 0.460341  | 0.893813  | H | 4.852144  | -1.291202 | -0.824977 |
| C  | -4.774315 | -0.556792 | -1.419784 | C | -2.098902 | -2.759073 | 1.320425  |
| H  | -5.167790 | 0.180026  | -0.724887 | H | -1.363800 | -2.942573 | 0.538935  |
| N  | -0.903473 | -1.040097 | -1.161432 | C | -2.459478 | -3.745414 | 2.230140  |
| C  | -5.605459 | -1.201846 | -2.320382 | H | -2.004539 | -4.730542 | 2.170713  |
| H  | -6.665734 | -0.964767 | -2.333677 | C | -3.422825 | -3.449810 | 3.189178  |
| N  | 0.403250  | -1.275587 | -1.145359 | H | -3.736722 | -4.198972 | 3.912234  |
| C  | -5.060164 | -2.148535 | -3.188421 | C | -3.996385 | -2.181217 | 3.202354  |
| H  | -5.689773 | -2.672316 | -3.903812 | H | -4.758451 | -1.938583 | 3.938170  |
| N  | 2.921043  | -1.735205 | -1.429550 | C | -3.594046 | -1.231910 | 2.269366  |
| C  | -3.698116 | -2.405443 | -3.130771 | C | -4.175246 | 0.113520  | 2.173649  |
| H  | -3.236996 | -3.126485 | -3.801436 | C | -5.202965 | 0.622942  | 2.961525  |
| N  | -2.638295 | -1.530950 | 1.339389  | H | -5.630055 | 0.033902  | 3.768595  |
| C  | -2.903414 | -1.724520 | -2.207927 | C | -5.699855 | 1.899196  | 2.692151  |
| N  | -3.668629 | 0.872910  | 1.170476  | C | -5.185942 | 2.644334  | 1.636407  |
| C  | -1.474334 | -1.863514 | -2.086028 | H | -5.590883 | 3.626922  | 1.409554  |
| N  | -2.597617 | 1.918515  | -0.928023 | C | -4.154866 | 2.101845  | 0.869832  |
| C  | -0.483139 | -2.639717 | -2.696313 | C | -3.539631 | 2.698365  | -0.314258 |
| H  | -0.604924 | -3.379369 | -3.478087 | C | -3.899147 | 3.933289  | -0.851534 |
| N  | 2.202497  | 1.188701  | -1.747759 | H | -4.647493 | 4.546876  | -0.356232 |
| C  | 0.698622  | -2.231428 | -2.074424 | C | -3.306224 | 4.369473  | -2.031313 |
| N  | 3.524368  | 0.734828  | 0.457135  | H | -3.584999 | 5.328229  | -2.462029 |
| C  | 2.111933  | -2.519424 | -2.210237 | C | -2.363577 | 3.555791  | -2.655093 |
| N  | 2.484888  | -1.408144 | 1.457711  | H | -1.889048 | 3.854888  | -3.585778 |
| C  | 2.649465  | -3.501115 | -3.041498 | C | -2.034935 | 2.340606  | -2.069269 |
| H  | 1.986924  | -4.110776 | -3.651265 | H | -1.300611 | 1.667015  | -2.504648 |
| C  | 4.024824  | -3.693014 | -3.076664 | C | 1.537635  | 1.286919  | -2.911473 |



|   |          |           |           |   |           |           |          |
|---|----------|-----------|-----------|---|-----------|-----------|----------|
| H | 0.769415 | 0.533211  | -3.079718 | C | 3.456255  | -2.753225 | 3.694683 |
| C | 1.816545 | 2.269514  | -3.851581 | H | 3.837852  | -3.277089 | 4.567773 |
| H | 1.264299 | 2.297896  | -4.787421 | C | 2.387765  | -3.267709 | 2.965809 |
| C | 2.829224 | 3.186292  | -3.581139 | H | 1.912673  | -4.203698 | 3.246556 |
| H | 3.081859 | 3.964057  | -4.298048 | C | 1.934495  | -2.565528 | 1.856399 |
| C | 3.534999 | 3.080333  | -2.386463 | H | 1.107674  | -2.925901 | 1.247744 |
| H | 4.342839 | 3.774281  | -2.169001 | O | -1.473806 | 0.513905  | 2.827755 |
| C | 3.217794 | 2.069988  | -1.483372 | H | -1.617897 | 1.473305  | 3.013095 |
| C | 3.954753 | 1.831051  | -0.231141 | H | -0.511804 | 0.405011  | 2.821594 |
| C | 5.017272 | 2.570634  | 0.238567  | H | -1.633777 | 3.895602  | 3.148735 |
| H | 5.395447 | 3.445861  | -0.282400 | O | -2.232693 | 3.142356  | 3.254399 |
| C | 5.659060 | 2.183503  | 1.440982  | H | -2.603106 | 3.267655  | 4.141369 |
| C | 5.205800 | 1.036149  | 2.124621  | H | -6.508161 | 2.302473  | 3.297742 |
| H | 5.688372 | 0.714848  | 3.042541  | O | 6.657859  | 2.948281  | 1.817387 |
| C | 4.133633 | 0.327197  | 1.601802  | C | 7.401765  | 2.636906  | 3.01532  |
| C | 3.550215 | -0.900939 | 2.156705  | H | 8.158685  | 3.415907  | 3.087392 |
| C | 4.041200 | -1.560950 | 3.280990  | H | 6.741387  | 2.672943  | 3.88769  |
| H | 4.887386 | -1.152260 | 3.827425  | H | 7.879946  | 1.657225  | 2.916579 |

### Min-3 A (4+ doublet)

E= -2811.189 80 a.u.

|    |           |           |           |   |           |           |           |
|----|-----------|-----------|-----------|---|-----------|-----------|-----------|
| Ru | -1.983311 | -0.144100 | 0.270352  | C | 5.630441  | 0.815852  | 2.812673  |
| Ru | 2.542606  | 0.140087  | -0.290888 | H | 6.649977  | 1.190630  | 2.839171  |
| N  | -2.668498 | -1.352650 | 1.796349  | C | 4.920967  | 0.830424  | 1.620972  |
| O  | 0.439398  | -0.964244 | -1.662064 | H | 5.369388  | 1.205853  | 0.702986  |
| O  | 1.240624  | 0.067778  | -1.638489 | C | -1.798207 | 2.006753  | 2.514714  |
| C  | -3.940679 | -1.780995 | 1.920307  | H | -0.919219 | 1.434881  | 2.806978  |
| H  | -4.616907 | -1.517773 | 1.110340  | C | -2.181425 | 3.150029  | 3.201541  |
| N  | -0.199591 | -0.613309 | 1.280298  | H | -1.600654 | 3.487898  | 4.055490  |
| C  | -4.372576 | -2.508484 | 3.018048  | C | -3.319738 | 3.834181  | 2.782874  |
| H  | -5.407671 | -2.833959 | 3.073203  | H | -3.652994 | 4.729508  | 3.302576  |
| N  | 1.085481  | -0.200143 | 1.247203  | C | -4.038377 | 3.347837  | 1.695882  |
| C  | -3.463926 | -2.802770 | 4.034904  | H | -4.937758 | 3.859654  | 1.363482  |
| H  | -3.776780 | -3.366232 | 4.910676  | C | -3.612630 | 2.193099  | 1.045292  |
| N  | 3.658128  | 0.372855  | 1.522863  | C | -4.336663 | 1.561162  | -0.064419 |
| C  | -2.150870 | -2.368466 | 3.911434  | C | -5.510740 | 2.015461  | -0.628989 |
| H  | -1.416721 | -2.589687 | 4.682457  | H | -5.994414 | 2.932302  | -0.303608 |
| N  | -2.484172 | 1.536611  | 1.456698  | C | -6.125967 | 1.266692  | -1.658872 |
| C  | -1.768262 | -1.648119 | 2.779798  | C | -5.530721 | 0.057139  | -2.069063 |
| N  | -3.771641 | 0.400512  | -0.491859 | H | -5.988659 | -0.549728 | -2.844105 |
| C  | -0.430436 | -1.168872 | 2.520565  | C | -4.348568 | -0.346819 | -1.462386 |
| N  | -2.455663 | -1.730702 | -1.018805 | C | -3.611104 | -1.582356 | -1.737546 |
| C  | 0.720307  | -1.094423 | 3.293617  | C | -4.030605 | -2.572043 | -2.620782 |
| H  | 0.860510  | -1.430811 | 4.313638  | H | -4.951555 | -2.444804 | -3.183751 |
| N  | 3.198570  | -1.874792 | -0.411492 | C | -3.273620 | -3.728147 | -2.771082 |
| C  | 1.654775  | -0.477460 | 2.457143  | H | -3.595532 | -4.509467 | -3.455546 |
| N  | 4.117380  | 0.327705  | -1.496785 | C | -2.108363 | -3.874794 | -2.022036 |
| C  | 3.039557  | -0.097953 | 2.645899  | H | -1.495722 | -4.768470 | -2.101136 |
| N  | 2.605827  | 2.231079  | -0.560684 | C | -1.736707 | -2.859553 | -1.152312 |
| C  | 3.704047  | -0.146352 | 3.871322  | H | -0.833307 | -2.916028 | -0.549868 |
| H  | 3.191436  | -0.527570 | 4.751234  | C | 2.668637  | -2.956752 | 0.179427  |
| C  | 5.013668  | 0.309636  | 3.956695  | H | 1.794949  | -2.773312 | 0.802284  |
| H  | 5.545584  | 0.279964  | 4.904733  | C | 3.197732  | -4.231888 | 0.017818  |

|   |          |           |           |   |           |           |           |
|---|----------|-----------|-----------|---|-----------|-----------|-----------|
| H | 2.741848 | -5.077294 | 0.525811  | C | 2.974821  | 4.941125  | -1.104616 |
| C | 4.318488 | -4.393946 | -0.789867 | H | 3.119121  | 5.997169  | -1.319617 |
| H | 4.763641 | -5.375647 | -0.933937 | C | 1.986496  | 4.522553  | -0.217935 |
| C | 4.869879 | -3.277055 | -1.414258 | H | 1.338994  | 5.237481  | 0.282054  |
| H | 5.743428 | -3.387700 | -2.051624 | C | 1.836710  | 3.162968  | 0.026498  |
| C | 4.299748 | -2.024055 | -1.214036 | H | 1.084889  | 2.783687  | 0.718115  |
| C | 4.813262 | -0.788718 | -1.828636 | H | -0.844954 | -0.570843 | -3.341369 |
| C | 5.907190 | -0.679393 | -2.682965 | O | -1.618676 | 0.009696  | -3.454845 |
| H | 6.485154 | -1.554773 | -2.966716 | H | -1.570723 | 0.354724  | -4.359621 |
| C | 6.256408 | 0.577367  | -3.179978 | O | -7.236726 | 1.774485  | -2.145533 |
| H | 7.106704 | 0.674233  | -3.850989 | C | -7.953832 | 1.074850  | -3.183374 |
| C | 5.529394 | 1.708051  | -2.817164 | H | -8.816261 | 1.701617  | -3.403398 |
| H | 5.811939 | 2.684450  | -3.201652 | H | -7.326005 | 0.975386  | -4.074888 |
| C | 4.443699 | 1.563799  | -1.952734 | H | -8.28543  | 0.097029  | -2.81924  |
| C | 3.596657 | 2.635329  | -1.420463 | O | -1.28901  | 1.300434  | -1.18741  |
| C | 3.788094 | 3.986106  | -1.705245 | H | -1.48706  | 0.959546  | -2.11626  |
| H | 4.576218 | 4.294459  | -2.387608 | H | -0.32184  | 1.398834  | -1.18846  |

### Min-3 A (4+ quartet)

E= -2811.188 34 a.u.

|    |           |           |           |   |           |           |           |
|----|-----------|-----------|-----------|---|-----------|-----------|-----------|
| Ru | -1.977204 | -0.117308 | 0.307900  | H | 6.779068  | 1.029010  | 2.689326  |
| Ru | 2.580368  | 0.132662  | -0.258758 | C | 5.013100  | 0.702025  | 1.520239  |
| N  | -2.694696 | -1.087217 | 1.979507  | H | 5.475835  | 0.961113  | 0.570804  |
| O  | 0.542404  | -1.376913 | -1.856665 | C | -1.793722 | 2.307699  | 2.242805  |
| O  | 1.284365  | -0.349267 | -1.673722 | H | -0.922948 | 1.770960  | 2.616180  |
| C  | -3.979404 | -1.451272 | 2.167968  | C | -2.175298 | 3.532828  | 2.771707  |
| H  | -4.659355 | -1.257174 | 1.341754  | H | -1.601598 | 3.973775  | 3.582411  |
| N  | -0.206103 | -0.478972 | 1.362084  | C | -3.303857 | 4.164814  | 2.255333  |
| C  | -4.418118 | -2.033365 | 3.346155  | H | -3.634873 | 5.122022  | 2.651507  |
| H  | -5.463062 | -2.311386 | 3.451663  | C | -4.016622 | 3.545821  | 1.233917  |
| N  | 1.097015  | -0.123047 | 1.269929  | H | -4.909424 | 4.015867  | 0.829695  |
| C  | -3.502441 | -2.246007 | 4.377464  | C | -3.593989 | 2.313205  | 0.743993  |
| H  | -3.819678 | -2.696619 | 5.314825  | C | -4.316902 | 1.542786  | -0.275317 |
| N  | 3.711394  | 0.352833  | 1.475201  | C | -5.494608 | 1.915170  | -0.890652 |
| C  | -2.177653 | -1.877091 | 4.188947  | H | -5.981558 | 2.864691  | -0.686329 |
| H  | -1.439020 | -2.037543 | 4.970568  | C | -6.114122 | 1.032428  | -1.804816 |
| N  | -2.472624 | 1.709796  | 1.246518  | C | -5.516821 | -0.219293 | -2.053149 |
| C  | -1.788374 | -1.302109 | 2.978600  | H | -5.979634 | -0.928716 | -2.732322 |
| N  | -3.748989 | 0.337336  | -0.548127 | C | -4.329675 | -0.535181 | -1.404838 |
| C  | -0.440142 | -0.898612 | 2.654933  | C | -3.594502 | -1.798786 | -1.510103 |
| N  | -2.446912 | -1.858387 | -0.764284 | C | -4.013712 | -2.896907 | -2.254973 |
| C  | 0.724004  | -0.795015 | 3.402127  | H | -4.926707 | -2.839989 | -2.842111 |
| H  | 0.867679  | -1.037216 | 4.447998  | C | -3.270454 | -4.072146 | -2.230924 |
| N  | 3.234958  | -1.867361 | -0.328533 | H | -3.595498 | -4.937931 | -2.803143 |
| C  | 1.667888  | -0.302832 | 2.496910  | C | -2.117335 | -4.127144 | -1.451690 |
| N  | 4.096595  | 0.290359  | -1.530849 | H | -1.517188 | -5.030880 | -1.394989 |
| C  | 3.072774  | 0.017914  | 2.636913  | C | -1.741891 | -3.003541 | -0.729648 |
| N  | 2.584685  | 2.211863  | -0.619313 | H | -0.848291 | -2.988664 | -0.110414 |
| C  | 3.753914  | 0.019960  | 3.854051  | C | 2.750938  | -2.924571 | 0.341542  |
| H  | 3.227246  | -0.252037 | 4.765532  | H | 1.914097  | -2.718045 | 1.007468  |
| C  | 5.095465  | 0.378286  | 3.892006  | C | 3.282631  | -4.201501 | 0.209851  |
| H  | 5.636862  | 0.384226  | 4.835027  | H | 2.865199  | -5.025024 | 0.782701  |
| C  | 5.733578  | 0.733607  | 2.704340  | C | 4.355748  | -4.394215 | -0.654805 |

|   |          |           |           |   |           |           |           |
|---|----------|-----------|-----------|---|-----------|-----------|-----------|
| H | 4.799588 | -5.379047 | -0.779725 | H | 3.041191  | 5.951236  | -1.524827 |
| C | 4.860815 | -3.304805 | -1.358333 | C | 1.937104  | 4.506484  | -0.356953 |
| H | 5.699775 | -3.437519 | -2.036687 | H | 1.289074  | 5.232801  | 0.125471  |
| C | 4.292803 | -2.045468 | -1.184409 | C | 1.809377  | 3.156447  | -0.058768 |
| C | 4.770585 | -0.835783 | -1.868401 | H | 1.070334  | 2.791174  | 0.652766  |
| C | 5.818482 | -0.753981 | -2.785777 | H | -1.362840 | -0.671453 | -3.994815 |
| H | 6.377765 | -1.639363 | -3.076114 | O | -1.984412 | -0.021346 | -3.633423 |
| C | 6.143818 | 0.485993  | -3.331549 | H | -2.227270 | 0.536116  | -4.389037 |
| H | 6.958148 | 0.563726  | -4.047823 | O | -7.232243 | 1.466138  | -2.344779 |
| C | 5.435297 | 1.628878  | -2.962425 | C | -7.963089 | 0.625886  | -3.261169 |
| H | 5.697034 | 2.593228  | -3.389910 | H | -8.832754 | 1.212956  | -3.551357 |
| C | 4.394555 | 1.509555  | -2.042725 | H | -7.351088 | 0.403918  | -4.141607 |
| C | 3.555994 | 2.594254  | -1.513221 | H | -8.28307  | -0.29233  | -2.75801  |
| C | 3.724935 | 3.934398  | -1.850645 | O | -1.16328  | 1.023488  | -1.3235   |
| H | 4.497183 | 4.226778  | -2.557684 | H | -1.49243  | 0.706958  | -2.21899  |
| C | 2.909909 | 4.902080  | -1.270833 | H | -0.19479  | 0.932235  | -1.38234  |

### Min-3 B (4+ doublet)

E= -2811.19132 a.u.

|    |           |           |           |   |           |           |           |
|----|-----------|-----------|-----------|---|-----------|-----------|-----------|
| Ru | -2.499720 | 0.003095  | -0.159618 | C | 4.100800  | 1.283880  | 2.166242  |
| Ru | 2.069577  | 0.056328  | 0.123359  | H | 4.743847  | 1.319415  | 1.288935  |
| N  | -3.540035 | -0.622504 | 1.510308  | C | -2.609181 | 2.781372  | 1.233091  |
| O  | 0.176505  | -1.425763 | -1.215220 | H | -1.835923 | 2.348462  | 1.865367  |
| O  | 0.979497  | -0.393713 | -1.329534 | C | -3.046222 | 4.087429  | 1.410633  |
| C  | -4.839530 | -0.981985 | 1.513193  | H | -2.616670 | 4.697935  | 2.200247  |
| H  | -5.335315 | -1.002605 | 0.545485  | C | -4.042356 | 4.581911  | 0.573356  |
| N  | -0.971643 | -0.096690 | 1.279979  | H | -4.413455 | 5.597515  | 0.689687  |
| C  | -5.515644 | -1.304037 | 2.679167  | C | -4.570315 | 3.752405  | -0.411187 |
| H  | -6.562478 | -1.590879 | 2.631272  | H | -5.357086 | 4.117566  | -1.066226 |
| N  | 0.325503  | 0.272596  | 1.373702  | C | -4.098886 | 2.449142  | -0.543241 |
| C  | -4.832448 | -1.247775 | 3.894398  | C | -4.632400 | 1.477330  | -1.502531 |
| H  | -5.339224 | -1.489155 | 4.825679  | C | -5.653350 | 1.700231  | -2.424972 |
| N  | 2.843546  | 0.846095  | 1.965517  | H | -6.120220 | 2.677529  | -2.513499 |
| C  | -3.493004 | -0.882500 | 3.897990  | C | -6.079383 | 0.647522  | -3.232891 |
| H  | -2.930986 | -0.838191 | 4.827763  | H | -6.873960 | 0.807953  | -3.957565 |
| N  | -3.111808 | 1.976952  | 0.279549  | C | -5.501612 | -0.611946 | -3.101880 |
| C  | -2.859456 | -0.578078 | 2.692745  | H | -5.845227 | -1.439085 | -3.717411 |
| N  | -4.070449 | 0.248671  | -1.407393 | C | -4.482521 | -0.794206 | -2.166909 |
| C  | -1.467750 | -0.215423 | 2.561671  | C | -3.788645 | -2.043112 | -1.857935 |
| N  | -2.809923 | -1.932973 | -0.908172 | C | -4.093274 | -3.274876 | -2.429333 |
| C  | -0.477437 | 0.095176  | 3.482490  | H | -4.875578 | -3.349688 | -3.180347 |
| H  | -0.551344 | 0.104474  | 4.563068  | C | -3.398434 | -4.409520 | -2.025809 |
| N  | 2.526582  | -1.909506 | 0.774511  | H | -3.630846 | -5.378217 | -2.461908 |
| C  | 0.637943  | 0.396020  | 2.696097  | C | -2.414095 | -4.287430 | -1.047654 |
| N  | 3.848373  | -0.196711 | -0.693601 | H | -1.857068 | -5.152060 | -0.697773 |
| C  | 1.990326  | 0.791950  | 3.028771  | C | -2.153472 | -3.035834 | -0.507557 |
| N  | 2.371117  | 1.938174  | -0.785146 | H | -1.389697 | -2.879884 | 0.250268  |
| C  | 2.407770  | 1.143906  | 4.312298  | C | 1.785150  | -2.723883 | 1.540971  |
| H  | 1.708419  | 1.090266  | 5.143175  | H | 0.825580  | -2.322864 | 1.862259  |
| C  | 3.713078  | 1.575713  | 4.511827  | C | 2.208098  | -3.994798 | 1.909505  |
| H  | 4.054766  | 1.854252  | 5.505863  | H | 1.578923  | -4.614283 | 2.542734  |
| C  | 4.572357  | 1.655748  | 3.416886  | C | 3.446548  | -4.444553 | 1.462434  |
| H  | 5.598415  | 1.995599  | 3.527603  | H | 3.811825  | -5.431968 | 1.734666  |

|   |          |           |           |   |           |           |           |
|---|----------|-----------|-----------|---|-----------|-----------|-----------|
| C | 4.219020 | -3.609135 | 0.660065  | C | 1.894532  | 4.217765  | -1.357897 |
| H | 5.188008 | -3.944770 | 0.299657  | H | 1.216903  | 5.063979  | -1.286662 |
| C | 3.746280 | -2.343512 | 0.328221  | C | 1.574828  | 3.018145  | -0.733605 |
| C | 4.493446 | -1.385783 | -0.504982 | H | 0.656223  | 2.897198  | -0.159855 |
| C | 5.732534 | -1.591207 | -1.068433 | O | -1.450410 | 0.883614  | -1.833647 |
| H | 6.282737 | -2.519743 | -0.944032 | H | -1.527850 | 0.264374  | -2.626279 |
| C | 6.324141 | -0.565845 | -1.847646 | H | -0.488351 | 0.911637  | -1.682104 |
| C | 5.638359 | 0.656766  | -2.017180 | H | -0.772692 | -1.581273 | -3.110694 |
| H | 6.076767 | 1.455624  | -2.607261 | O | -1.482194 | -1.091472 | -3.565916 |
| C | 4.396826 | 0.814905  | -1.421164 | H | -1.246617 | -1.078745 | -4.506372 |
| C | 3.559145 | 2.022367  | -1.465996 | O | 7.499564  | -0.852179 | -2.354513 |
| C | 3.928521 | 3.199519  | -2.112337 | C | 8.203118  | 0.115404  | -3.16482  |
| H | 4.871980 | 3.256215  | -2.649178 | H | 8.422687  | 1.010399  | -2.57423  |
| C | 3.090180 | 4.308513  | -2.064187 | H | 9.129332  | -0.37902  | -3.45212  |
| H | 3.372190 | 5.231319  | -2.565242 | H | 7.614233  | 0.357421  | -4.05518  |

### Min-3 B (4+ quartet)

E= -2811.188 46 a.u.

|    |           |           |           |   |           |           |           |
|----|-----------|-----------|-----------|---|-----------|-----------|-----------|
| Ru | -2.488412 | 0.038835  | -0.133737 | H | 4.811792  | 0.229423  | 1.690643  |
| Ru | 2.050949  | -0.080981 | 0.208246  | C | -2.717045 | 2.192762  | 2.088957  |
| N  | -3.602121 | -1.070028 | 1.202480  | H | -1.975919 | 1.566746  | 2.583990  |
| O  | 0.442710  | -0.976981 | -1.503731 | C | -3.186856 | 3.363052  | 2.670338  |
| O  | 1.189908  | 0.102292  | -1.603319 | H | -2.815408 | 3.668950  | 3.644698  |
| C  | -4.911481 | -1.359890 | 1.063164  | C | -4.142630 | 4.113845  | 1.990961  |
| H  | -5.381388 | -1.031998 | 0.138746  | H | -4.537089 | 5.031681  | 2.420737  |
| N  | -1.025084 | -0.569847 | 1.210604  | C | -4.602858 | 3.664087  | 0.757390  |
| C  | -5.628262 | -2.033542 | 2.039429  | H | -5.361578 | 4.227996  | 0.220851  |
| H  | -6.681501 | -2.247824 | 1.880571  | C | -4.102188 | 2.480228  | 0.222518  |
| N  | 0.297268  | -0.361099 | 1.411921  | C | -4.575023 | 1.879806  | -1.028348 |
| C  | -4.977234 | -2.419242 | 3.211656  | C | -5.558624 | 2.391303  | -1.873584 |
| H  | -5.516135 | -2.944032 | 3.996826  | H | -6.038093 | 3.342669  | -1.659075 |
| N  | 2.851391  | -0.246443 | 2.158456  | C | -5.932516 | 1.658861  | -2.998547 |
| C  | -3.628224 | -2.127088 | 3.360481  | H | -6.699806 | 2.044317  | -3.665638 |
| H  | -3.091014 | -2.422002 | 4.258626  | C | -5.338707 | 0.426916  | -3.260250 |
| N  | -3.148591 | 1.759927  | 0.890712  | H | -5.643341 | -0.154854 | -4.126296 |
| C  | -2.952957 | -1.455129 | 2.341095  | C | -4.357576 | -0.048925 | -2.390587 |
| N  | -3.997856 | 0.688186  | -1.312804 | C | -3.651610 | -1.327392 | -2.477891 |
| C  | -1.547042 | -1.126517 | 2.359796  | C | -3.906706 | -2.304382 | -3.435664 |
| N  | -2.716740 | -1.533453 | -1.498791 | H | -4.654549 | -2.131481 | -4.205503 |
| C  | -0.552201 | -1.245146 | 3.318216  | C | -3.212475 | -3.508859 | -3.391343 |
| H  | -0.639069 | -1.638426 | 4.323683  | H | -3.411194 | -4.282683 | -4.129153 |
| N  | 2.731765  | -2.054680 | -0.082262 | C | -2.274599 | -3.712561 | -2.381726 |
| C  | 0.593523  | -0.753954 | 2.684964  | H | -1.721411 | -4.644467 | -2.305988 |
| N  | 3.807850  | 0.217556  | -0.695142 | C | -2.058499 | -2.705233 | -1.452130 |
| C  | 1.965709  | -0.625312 | 3.126745  | H | -1.336822 | -2.807685 | -0.645122 |
| N  | 2.208243  | 2.033381  | 0.277692  | C | 2.120858  | -3.179725 | 0.323457  |
| C  | 2.382694  | -0.849119 | 4.439403  | H | 1.170553  | -3.041614 | 0.837366  |
| H  | 1.657921  | -1.150721 | 5.191793  | C | 2.659752  | -4.440391 | 0.105382  |
| C  | 3.719037  | -0.673488 | 4.774478  | H | 2.134033  | -5.323484 | 0.458130  |
| H  | 4.058045  | -0.842373 | 5.793705  | C | 3.877482  | -4.542827 | -0.562491 |
| C  | 4.614437  | -0.273146 | 3.784034  | H | 4.329023  | -5.514420 | -0.748504 |
| H  | 5.667744  | -0.120301 | 4.002459  | C | 4.516247  | -3.381697 | -0.984541 |
| C  | 4.143660  | -0.073580 | 2.494133  | H | 5.470705  | -3.440356 | -1.501496 |

|   |          |           |           |   |           |           |           |
|---|----------|-----------|-----------|---|-----------|-----------|-----------|
| C | 3.933012 | -2.142694 | -0.732035 | H | 0.867064  | 4.938784  | 1.332321  |
| C | 4.539213 | -0.856771 | -1.098867 | C | 1.368514  | 2.902230  | 0.865051  |
| C | 5.732807 | -0.674870 | -1.767359 | H | 0.515213  | 2.455704  | 1.373552  |
| H | 6.342523 | -1.508184 | -2.105481 | O | -1.319656 | 1.349819  | -1.387149 |
| C | 6.188524 | 0.636169  | -2.030303 | H | -1.394422 | 1.101189  | -2.358559 |
| C | 5.416404 | 1.731643  | -1.586962 | H | -0.362997 | 1.278535  | -1.216802 |
| H | 5.755686 | 2.748034  | -1.760962 | H | -0.751219 | -0.158305 | -4.083258 |
| C | 4.222799 | 1.487113  | -0.922073 | O | -1.476304 | 0.456134  | -3.891372 |
| C | 3.323383 | 2.510668  | -0.362162 | H | -1.505289 | 1.052836  | -4.655769 |
| C | 3.573348 | 3.878996  | -0.421517 | O | 7.330568  | 0.723867  | -2.675871 |
| H | 4.460104 | 4.251066  | -0.927917 | C | 7.885238  | 2.016897  | -2.99339  |
| C | 2.692007 | 4.772528  | 0.179172  | H | 8.10261   | 2.570504  | -2.07412  |
| H | 2.886258 | 5.841762  | 0.140903  | H | 8.810471  | 1.804189  | -3.52616  |
| C | 1.571066 | 4.275465  | 0.837674  | H | 7.199826  | 2.573174  | -3.64106  |

### TS-3 A (4+ doublet)

E= -2887.587 09 a.u.

|    |           |           |           |   |           |           |           |
|----|-----------|-----------|-----------|---|-----------|-----------|-----------|
| Ru | -2.098876 | -0.117453 | 0.191667  | C | -1.471809 | 2.806982  | 1.065563  |
| Ru | 2.451882  | -0.148510 | -0.236555 | H | -0.616931 | 2.335669  | 1.547242  |
| N  | -2.875700 | -0.415290 | 2.078162  | C | -1.702893 | 4.173414  | 1.146746  |
| O  | -0.124172 | -1.734014 | -0.977768 | H | -1.022037 | 4.808083  | 1.708358  |
| O  | 0.913957  | -1.182182 | -1.463637 | C | -2.832633 | 4.698026  | 0.522622  |
| C  | -4.197220 | -0.433095 | 2.351594  | H | -3.058681 | 5.760349  | 0.579563  |
| H  | -4.864362 | -0.304733 | 1.503633  | C | -3.685422 | 3.837352  | -0.160411 |
| N  | -0.319621 | -0.367308 | 1.393497  | H | -4.579819 | 4.226000  | -0.640501 |
| C  | -4.692203 | -0.600262 | 3.635352  | C | -3.403080 | 2.473812  | -0.209271 |
| H  | -5.766274 | -0.605733 | 3.798641  | C | -4.271854 | 1.483738  | -0.863586 |
| N  | 1.019026  | -0.485710 | 1.250669  | C | -5.437456 | 1.757865  | -1.549132 |
| C  | -3.796445 | -0.756751 | 4.691680  | H | -5.809073 | 2.769518  | -1.685976 |
| H  | -4.154453 | -0.888067 | 5.709788  | C | -6.189432 | 0.694249  | -2.098884 |
| N  | 3.630152  | -0.704033 | 1.342962  | C | -5.734522 | -0.625765 | -1.920395 |
| C  | -2.435566 | -0.744161 | 4.419347  | H | -6.293609 | -1.462724 | -2.327275 |
| H  | -1.708787 | -0.866712 | 5.218721  | C | -4.554813 | -0.839854 | -1.215877 |
| N  | -2.287097 | 1.968872  | 0.404504  | C | -3.956507 | -2.143209 | -0.900275 |
| C  | -1.994436 | -0.574332 | 3.106897  | C | -4.555362 | -3.366159 | -1.191117 |
| N  | -3.850853 | 0.199428  | -0.708270 | H | -5.500074 | -3.396875 | -1.727955 |
| C  | -0.604840 | -0.576821 | 2.713902  | C | -3.953595 | -4.547565 | -0.771331 |
| N  | -2.761773 | -2.083833 | -0.230041 | H | -4.418337 | -5.506810 | -0.985778 |
| C  | 0.561658  | -0.820324 | 3.438229  | C | -2.760443 | -4.476463 | -0.058921 |
| H  | 0.657869  | -1.031951 | 4.495951  | H | -2.268075 | -5.373184 | 0.307004  |
| N  | 3.220491  | -1.981772 | -1.044366 | C | -2.198764 | -3.230523 | 0.187480  |
| C  | 1.564938  | -0.755689 | 2.482917  | H | -1.261367 | -3.121954 | 0.728777  |
| N  | 3.950773  | 0.432210  | -1.483013 | C | 2.853622  | -3.207033 | -0.643465 |
| C  | 2.993052  | -0.909917 | 2.534741  | H | 2.122501  | -3.246669 | 0.162041  |
| N  | 2.809367  | 1.846839  | 0.398779  | C | 3.360547  | -4.358179 | -1.234017 |
| C  | 3.721663  | -1.257065 | 3.675713  | H | 3.043410  | -5.333067 | -0.873986 |
| H  | 3.195608  | -1.418489 | 4.613417  | C | 4.263766  | -4.233792 | -2.286687 |
| C  | 5.097811  | -1.400465 | 3.597958  | H | 4.670708  | -5.115425 | -2.776170 |
| H  | 5.673322  | -1.671418 | 4.479933  | C | 4.650162  | -2.962869 | -2.698968 |
| C  | 5.733440  | -1.198222 | 2.370006  | H | 5.368054  | -2.843512 | -3.506779 |
| H  | 6.809649  | -1.303150 | 2.264291  | C | 4.124492  | -1.843495 | -2.055643 |
| C  | 4.971393  | -0.854928 | 1.268381  | C | 4.537807  | -0.465105 | -2.313515 |
| H  | 5.423969  | -0.687257 | 0.294863  | C | 5.500558  | -0.043455 | -3.232059 |

|   |           |           |           |   |           |           |           |
|---|-----------|-----------|-----------|---|-----------|-----------|-----------|
| H | 5.969660  | -0.752301 | -3.909447 | H | -1.477965 | -0.277996 | -2.449503 |
| C | 5.869433  | 1.297764  | -3.253713 | H | -0.477985 | 0.751755  | -1.844556 |
| C | 5.308312  | 2.189640  | -2.340158 | H | 1.446005  | 1.202881  | -2.823033 |
| H | 5.637185  | 3.225352  | -2.322922 | O | 1.165692  | 1.396474  | -1.913604 |
| C | 4.344168  | 1.730887  | -1.444174 | H | 1.150802  | 2.394102  | -1.848220 |
| C | 3.731525  | 2.512223  | -0.363509 | H | 1.491884  | 4.660638  | -2.319100 |
| C | 4.097430  | 3.819697  | -0.052929 | O | 1.045921  | 4.095113  | -1.669974 |
| H | 4.844551  | 4.334584  | -0.651908 | H | 0.15237   | 4.464375  | -1.61783  |
| C | 3.531342  | 4.455229  | 1.047819  | H | 6.618977  | 1.644643  | -3.96101  |
| H | 3.827031  | 5.469497  | 1.306112  | O | -7.2837   | 1.045119  | -2.74274  |
| C | 2.606018  | 3.763035  | 1.823026  | C | -8.12554  | 0.031677  | -3.32659  |
| H | 2.162954  | 4.210412  | 2.709118  | H | -8.94709  | 0.576562  | -3.78845  |
| C | 2.275892  | 2.461654  | 1.468053  | H | -7.57258  | -0.52749  | -4.08862  |
| H | 1.577758  | 1.868731  | 2.055713  | H | -8.51076  | -0.63519  | -2.54813  |
| O | -1.427306 | 0.471197  | -1.833720 |   |           |           |           |

### TS-3 A (4+ quartet)

E= -2887.596 09 a.u.

|    |           |           |           |   |           |           |           |
|----|-----------|-----------|-----------|---|-----------|-----------|-----------|
| Ru | -2.086815 | -0.362060 | 0.097491  | H | 5.265032  | 0.233982  | 1.088140  |
| Ru | 2.452713  | 0.090933  | -0.110583 | C | -1.873756 | 0.498894  | 3.068428  |
| N  | -2.919268 | -2.033482 | 0.949402  | H | -1.058193 | -0.222953 | 3.070184  |
| O  | 0.661656  | -1.604222 | -2.307759 | C | -2.218429 | 1.209147  | 4.210201  |
| O  | 0.850327  | -0.436319 | -1.904807 | H | -1.670076 | 1.044849  | 5.134085  |
| C  | -4.232969 | -2.337974 | 0.919764  | C | -3.282233 | 2.106073  | 4.147932  |
| H  | -4.871575 | -1.653460 | 0.366146  | H | -3.586361 | 2.670257  | 5.026582  |
| N  | -0.397475 | -1.351112 | 0.752259  | C | -3.968966 | 2.255773  | 2.947752  |
| C  | -4.745626 | -3.455452 | 1.557878  | H | -4.816116 | 2.933990  | 2.884457  |
| H  | -5.810739 | -3.662917 | 1.504821  | C | -3.583363 | 1.515708  | 1.832851  |
| N  | 0.922823  | -1.067838 | 0.865970  | C | -4.284313 | 1.543633  | 0.543312  |
| C  | -3.876209 | -4.292875 | 2.258811  | C | -5.378476 | 2.324042  | 0.228131  |
| H  | -4.251629 | -5.176122 | 2.769971  | H | -5.811321 | 3.028737  | 0.932840  |
| N  | 3.493230  | -0.801500 | 1.393281  | C | -5.979316 | 2.201013  | -1.046001 |
| C  | -2.523438 | -3.985127 | 2.292108  | C | -5.451100 | 1.266303  | -1.959654 |
| H  | -1.819951 | -4.621653 | 2.823331  | H | -5.907560 | 1.129335  | -2.935297 |
| N  | -2.523861 | 0.651854  | 1.900062  | C | -4.349019 | 0.508195  | -1.582942 |
| C  | -2.058333 | -2.849418 | 1.627399  | C | -3.724457 | -0.563037 | -2.366859 |
| N  | -3.779139 | 0.662024  | -0.362781 | C | -4.190508 | -1.012904 | -3.597705 |
| C  | -0.681543 | -2.421888 | 1.578174  | H | -5.023474 | -0.509866 | -4.082160 |
| N  | -2.670970 | -1.186103 | -1.746748 | C | -3.606977 | -2.128469 | -4.191972 |
| C  | 0.466101  | -2.816577 | 2.243603  | H | -3.969280 | -2.490748 | -5.151170 |
| H  | 0.576958  | -3.615772 | 2.966217  | C | -2.580692 | -2.788751 | -3.523881 |
| N  | 3.401873  | -1.356776 | -1.335740 | H | -2.120905 | -3.683271 | -3.934735 |
| C  | 1.448036  | -1.935190 | 1.775712  | C | -2.145805 | -2.293247 | -2.301263 |
| N  | 3.981361  | 1.117753  | -0.845933 | H | -1.352377 | -2.775752 | -1.738551 |
| C  | 2.844637  | -1.776733 | 2.101180  | C | 3.104993  | -2.661203 | -1.440304 |
| N  | 2.262962  | 1.876069  | 0.971137  | H | 2.245325  | -2.997734 | -0.864755 |
| C  | 3.509758  | -2.515483 | 3.080278  | C | 3.835825  | -3.536644 | -2.236095 |
| H  | 2.970693  | -3.287371 | 3.624293  | H | 3.558917  | -4.586312 | -2.280592 |
| C  | 4.845041  | -2.255605 | 3.355481  | C | 4.916104  | -3.043126 | -2.959115 |
| H  | 5.373036  | -2.825189 | 4.116181  | H | 5.505993  | -3.698035 | -3.595733 |
| C  | 5.491777  | -1.248340 | 2.641662  | C | 5.245332  | -1.695887 | -2.842033 |
| H  | 6.533580  | -1.001535 | 2.826869  | H | 6.098982  | -1.294486 | -3.382406 |
| C  | 4.790312  | -0.550542 | 1.670325  | C | 4.487503  | -0.870120 | -2.016046 |

|   |          |          |           |   |           |          |           |
|---|----------|----------|-----------|---|-----------|----------|-----------|
| C | 4.804079 | 0.537620 | -1.755557 | O | -1.121001 | 1.455935 | -0.614186 |
| C | 5.858809 | 1.272290 | -2.298365 | H | -1.697518 | 2.056208 | -1.112424 |
| H | 6.528991 | 0.826644 | -3.028810 | H | -0.220761 | 1.534332 | -1.036976 |
| C | 6.051848 | 2.587247 | -1.882721 | H | 1.338123  | 1.660209 | -2.654073 |
| C | 5.206267 | 3.153516 | -0.929976 | O | 1.283648  | 1.998486 | -1.746998 |
| H | 5.366521 | 4.175614 | -0.597255 | H | 1.599479  | 2.941989 | -1.796807 |
| C | 4.162265 | 2.390887 | -0.410516 | H | 2.696234  | 4.782367 | -2.801322 |
| C | 3.214143 | 2.804438 | 0.632049  | O | 2.278587  | 4.543684 | -1.959915 |
| C | 3.270766 | 4.035425 | 1.281977  | H | 1.75514   | 5.325742 | -1.73036  |
| H | 4.030552 | 4.761977 | 1.005452  | H | 6.873672  | 3.169104 | -2.29278  |
| C | 2.364720 | 4.326597 | 2.296001  | O | -7.01388  | 2.981668 | -1.26587  |
| H | 2.413728 | 5.279307 | 2.817846  | C | -7.71748  | 2.908888 | -2.52374  |
| C | 1.407578 | 3.374273 | 2.637389  | H | -8.51507  | 3.645519 | -2.44455  |
| H | 0.687409 | 3.556973 | 3.430670  | H | -7.04621  | 3.17087  | -3.34812  |
| C | 1.392451 | 2.167735 | 1.951901  | H | -8.14392  | 1.909794 | -2.65958  |
| H | 0.667676 | 1.386209 | 2.173006  |   |           |          |           |

### TS-3 B (4+ doublet)

E= -2887.589 90 a.u.

|    |           |           |           |   |           |           |           |
|----|-----------|-----------|-----------|---|-----------|-----------|-----------|
| Ru | -2.605483 | 0.044831  | -0.201517 | H | 5.680621  | -1.818899 | 3.425791  |
| Ru | 2.034076  | -0.303735 | 0.148471  | C | 4.122189  | -1.196777 | 2.099929  |
| N  | -3.751665 | -0.473815 | 1.416886  | H | 4.788638  | -0.912053 | 1.290865  |
| O  | -0.044920 | -2.008330 | -1.559263 | C | -2.227044 | 2.707862  | 1.330430  |
| O  | 0.671971  | -0.982724 | -1.624952 | H | -1.554802 | 2.102960  | 1.935700  |
| C  | -5.098131 | -0.397248 | 1.457996  | C | -2.454738 | 4.049266  | 1.603465  |
| H  | -5.586362 | -0.027129 | 0.559966  | H | -1.958018 | 4.523492  | 2.445686  |
| N  | -1.104672 | -0.576252 | 1.161488  | C | -3.345679 | 4.755784  | 0.800126  |
| C  | -5.828792 | -0.764665 | 2.576653  | H | -3.557468 | 5.804989  | 0.992184  |
| H  | -6.912184 | -0.684502 | 2.559213  | C | -3.989575 | 4.091191  | -0.238411 |
| N  | 0.237426  | -0.714235 | 1.254285  | H | -4.711349 | 4.617712  | -0.857756 |
| C  | -5.152829 | -1.231084 | 3.704522  | C | -3.731442 | 2.740941  | -0.461176 |
| H  | -5.700227 | -1.527242 | 4.595992  | C | -4.426642 | 1.926758  | -1.462947 |
| N  | 2.800784  | -1.020035 | 1.877227  | C | -5.379510 | 2.368857  | -2.379851 |
| C  | -3.768313 | -1.311261 | 3.670171  | H | -5.662620 | 3.417028  | -2.428085 |
| H  | -3.211646 | -1.671352 | 4.531862  | C | -5.972573 | 1.445584  | -3.238329 |
| N  | -2.830105 | 2.062736  | 0.317534  | H | -6.717204 | 1.775070  | -3.958684 |
| C  | -3.082751 | -0.928017 | 2.515711  | C | -5.617254 | 0.100826  | -3.172262 |
| N  | -4.098664 | 0.613665  | -1.414843 | H | -6.081275 | -0.620321 | -3.840010 |
| C  | -1.648981 | -0.972552 | 2.370691  | C | -4.660159 | -0.301908 | -2.240258 |
| N  | -3.182708 | -1.782205 | -1.074836 | C | -4.177111 | -1.667366 | -2.013077 |
| C  | -0.646787 | -1.356448 | 3.245913  | C | -4.696507 | -2.793317 | -2.646412 |
| H  | -0.749591 | -1.712378 | 4.263402  | H | -5.483336 | -2.687873 | -3.389080 |
| N  | 2.740473  | -2.161245 | -0.635156 | C | -4.220368 | -4.055935 | -2.307508 |
| C  | 0.524090  | -1.177311 | 2.512257  | H | -4.626473 | -4.942007 | -2.789517 |
| N  | 3.758056  | 0.205660  | -0.716756 | C | -3.231819 | -4.164322 | -1.333395 |
| C  | 1.908319  | -1.370165 | 2.853824  | H | -2.844702 | -5.132630 | -1.028579 |
| N  | 2.311354  | 1.647160  | 0.909288  | C | -2.740999 | -3.008355 | -0.741442 |
| C  | 2.351927  | -1.884262 | 4.075204  | H | -1.959104 | -3.038047 | 0.014292  |
| H  | 1.623018  | -2.155600 | 4.834901  | C | 2.208745  | -3.373087 | -0.419120 |
| C  | 3.708905  | -2.052230 | 4.302302  | H | 1.313373  | -3.393403 | 0.198965  |
| H  | 4.064620  | -2.453233 | 5.248195  | C | 2.753616  | -4.532576 | -0.958267 |
| C  | 4.608403  | -1.703192 | 3.293174  | H | 2.294690  | -5.494691 | -0.748094 |

|   |          |           |           |   |           |          |           |
|---|----------|-----------|-----------|---|-----------|----------|-----------|
| C | 3.886778 | -4.431875 | -1.759638 | H | 1.341729  | 3.969419 | 3.152766  |
| H | 4.334877 | -5.318035 | -2.202592 | C | 1.601058  | 2.265945 | 1.867042  |
| C | 4.452416 | -3.179095 | -1.974064 | H | 0.745546  | 1.708907 | 2.245140  |
| H | 5.349585 | -3.080673 | -2.580123 | O | -1.456985 | 0.704833 | -1.941038 |
| C | 3.873443 | -2.053769 | -1.392890 | H | -1.429097 | 0.022876 | -2.632287 |
| C | 4.443584 | -0.703932 | -1.465069 | H | -0.503017 | 0.941472 | -1.788067 |
| C | 5.592323 | -0.334696 | -2.137298 | H | 1.563495  | 1.469389 | -2.537029 |
| H | 6.157068 | -1.034839 | -2.746927 | O | 1.145095  | 1.497686 | -1.661760 |
| C | 6.069025 | 0.988914  | -2.024543 | H | 1.061648  | 2.459956 | -1.426190 |
| C | 5.372135 | 1.897012  | -1.198621 | H | 0.996787  | 4.703564 | -0.527189 |
| H | 5.742816 | 2.908293  | -1.061886 | O | 0.486937  | 4.055342 | -1.03335  |
| C | 4.219425 | 1.470653  | -0.551086 | H | 0.157966  | 4.557666 | -1.79437  |
| C | 3.430870 | 2.262348  | 0.407345  | O | 7.165187  | 1.261779 | -2.70046  |
| C | 3.805454 | 3.526588  | 0.858188  | C | 7.752271  | 2.575354 | -2.62408  |
| H | 4.700525 | 4.002698  | 0.465790  | H | 8.057334  | 2.794501 | -1.59549  |
| C | 3.056808 | 4.164513  | 1.843380  | H | 8.628386  | 2.53202  | -3.26892  |
| H | 3.361272 | 5.139641  | 2.217189  | H | 7.049926  | 3.32736  | -2.9989   |
| C | 1.935592 | 3.520204  | 2.360867  |   |           |          |           |

### TS-3 B (4+ quartet)

E= -2887.589 14 a.u.

|    |           |           |           |   |           |           |           |
|----|-----------|-----------|-----------|---|-----------|-----------|-----------|
| Ru | -2.608359 | 0.053703  | -0.200284 | C | 4.595858  | -1.430334 | 3.443840  |
| Ru | 2.043754  | -0.262691 | 0.183175  | H | 5.668115  | -1.494415 | 3.607517  |
| N  | -3.764758 | -0.544787 | 1.382724  | C | 4.119916  | -0.983672 | 2.221191  |
| O  | -0.082085 | -2.017538 | -1.567150 | H | 4.795212  | -0.696724 | 1.420174  |
| O  | 0.617690  | -0.984994 | -1.670712 | C | -2.288315 | 2.650487  | 1.451495  |
| C  | -5.113789 | -0.514589 | 1.400615  | H | -1.619001 | 2.026818  | 2.040895  |
| H  | -5.598907 | -0.141010 | 0.502301  | C | -2.530283 | 3.978474  | 1.774200  |
| N  | -1.112124 | -0.569422 | 1.162873  | H | -2.047317 | 4.422407  | 2.640555  |
| C  | -5.850049 | -0.929948 | 2.498144  | C | -3.417115 | 4.709497  | 0.988093  |
| H  | -6.935090 | -0.885340 | 2.463838  | H | -3.639096 | 5.748680  | 1.219181  |
| N  | 0.234136  | -0.637691 | 1.283868  | C | -4.041741 | 4.083025  | -0.085510 |
| C  | -5.177191 | -1.397300 | 3.628130  | H | -4.758587 | 4.629229  | -0.693394 |
| H  | -5.729381 | -1.729775 | 4.503756  | C | -3.767741 | 2.745724  | -0.360162 |
| N  | 2.800158  | -0.883625 | 1.954477  | C | -4.438031 | 1.967806  | -1.406882 |
| C  | -3.790757 | -1.431710 | 3.616531  | C | -5.382873 | 2.438769  | -2.317465 |
| H  | -3.236934 | -1.791971 | 4.479950  | H | -5.676868 | 3.485053  | -2.324738 |
| N  | -2.872683 | 2.044128  | 0.403940  | C | -5.954902 | 1.546576  | -3.222343 |
| C  | -3.098329 | -1.001740 | 2.482199  | H | -6.692840 | 1.899186  | -3.938715 |
| N  | -4.096055 | 0.657469  | -1.410645 | C | -5.589789 | 0.203056  | -3.205603 |
| C  | -1.662801 | -0.995680 | 2.360394  | H | -6.040804 | -0.494846 | -3.906180 |
| N  | -3.185170 | -1.743646 | -1.133777 | C | -4.641550 | -0.229251 | -2.277406 |
| C  | -0.661687 | -1.335304 | 3.253705  | C | -4.160385 | -1.600461 | -2.087476 |
| H  | -0.767788 | -1.699454 | 4.267937  | C | -4.669369 | -2.708011 | -2.760566 |
| N  | 2.648261  | -2.182263 | -0.506457 | H | -5.440295 | -2.581202 | -3.516489 |
| C  | 0.514262  | -1.096315 | 2.544971  | C | -4.204294 | -3.980263 | -2.442793 |
| N  | 3.773861  | 0.133936  | -0.721968 | H | -4.602149 | -4.852614 | -2.955793 |
| C  | 1.898555  | -1.236924 | 2.919862  | C | -3.239871 | -4.117322 | -1.448057 |
| N  | 2.395912  | 1.724139  | 0.811837  | H | -2.864283 | -5.094653 | -1.158012 |
| C  | 2.328792  | -1.693348 | 4.167594  | C | -2.757837 | -2.978583 | -0.816921 |
| H  | 1.592113  | -1.969266 | 4.918122  | H | -1.992647 | -3.029323 | -0.045328 |
| C  | 3.686011  | -1.792831 | 4.436877  | C | 2.065909  | -3.358890 | -0.230282 |
| H  | 4.032033  | -2.149150 | 5.403962  | H | 1.172514  | -3.309435 | 0.389234  |



|   |          |           |           |   |           |          |           |
|---|----------|-----------|-----------|---|-----------|----------|-----------|
| C | 2.558156 | -4.566966 | -0.709412 | C | 2.105937  | 3.690807 | 2.156351  |
| H | 2.058959 | -5.496358 | -0.449653 | H | 1.534503  | 4.209261 | 2.921811  |
| C | 3.692632 | -4.557138 | -1.514799 | C | 1.717409  | 2.425818 | 1.734378  |
| H | 4.101636 | -5.483425 | -1.910977 | H | 0.840859  | 1.927445 | 2.144350  |
| C | 4.310332 | -3.342272 | -1.794094 | O | -1.442881 | 0.792979 | -1.888251 |
| H | 5.209045 | -3.313963 | -2.405049 | H | -1.458425 | 0.172332 | -2.635404 |
| C | 3.782716 | -2.164596 | -1.271208 | H | -0.474588 | 0.991144 | -1.754223 |
| C | 4.409827 | -0.845997 | -1.422857 | H | 1.571618  | 1.367930 | -2.607271 |
| C | 5.563641 | -0.564309 | -2.128465 | O | 1.181119  | 1.475627 | -1.725542 |
| H | 6.091873 | -1.321634 | -2.701264 | H | 1.155480  | 2.454026 | -1.550648 |
| C | 6.094610 | 0.743016  | -2.101228 | H | 1.204352  | 4.743507 | -0.767535 |
| C | 5.445154 | 1.727629  | -1.327212 | O | 0.665371  | 4.089382 | -1.23398  |
| H | 5.854870 | 2.730884  | -1.260713 | H | 0.327711  | 4.569701 | -2.00506  |
| C | 4.285186 | 1.387483  | -0.641842 | O | 7.192754  | 0.928867 | -2.80466  |
| C | 3.536051 | 2.264641  | 0.272237  | C | 7.831882  | 2.21938  | -2.81225  |
| C | 3.965384 | 3.535708  | 0.649548  | H | 8.155604  | 2.488117 | -1.80121  |
| H | 4.877177 | 3.950708  | 0.227301  | H | 8.699238  | 2.10276  | -3.45986  |
| C | 3.249774 | 4.258127  | 1.599991  | H | 7.15647   | 2.975596 | -3.22631  |
| H | 3.595940 | 5.239410  | 1.916987  |   |           |          |           |

## Structures for complex 22<sup>3+</sup>

### Min-1 (3+ unrestricted singlet)

E= -2748.788 55 a.u.

|    |           |           |           |   |           |           |           |
|----|-----------|-----------|-----------|---|-----------|-----------|-----------|
| Ru | 2.514329  | -0.387825 | 0.077221  | C | 4.234705  | -2.497604 | 1.046231  |
| N  | 3.687540  | 1.292785  | 0.966165  | C | 5.309292  | -3.385342 | 1.020580  |
| O  | 1.376360  | -1.436868 | -0.760585 | H | 5.477088  | -4.082879 | 1.836539  |
| O  | -1.007769 | -1.112813 | 0.782042  | C | 6.172261  | -3.367089 | -0.072752 |
| C  | 4.940529  | 1.234132  | 1.449476  | H | 7.012738  | -4.055717 | -0.107812 |
| H  | 5.375540  | 0.238147  | 1.531043  | C | 5.971715  | -2.468183 | -1.118572 |
| Ru | -1.838231 | 0.178879  | -0.075510 | H | 6.654690  | -2.454698 | -1.963412 |
| N  | 1.148774  | 1.240982  | 0.222502  | C | 4.886786  | -1.595374 | -1.059256 |
| C  | 5.655888  | 2.359468  | 1.830662  | C | 4.531682  | -0.570316 | -2.051534 |
| H  | 6.663986  | 2.256647  | 2.221928  | C | 5.255864  | -0.350636 | -3.220975 |
| N  | -0.107472 | 1.405434  | -0.212522 | H | 6.126798  | -0.959933 | -3.448049 |
| C  | 5.051924  | 3.608801  | 1.698041  | C | 4.859739  | 0.653031  | -4.098840 |
| H  | 5.584349  | 4.513437  | 1.981752  | H | 5.419893  | 0.831820  | -5.013401 |
| N  | -2.539183 | 2.097712  | -0.980956 | C | 3.742076  | 1.421000  | -3.788136 |
| C  | 3.755506  | 3.683868  | 1.206001  | H | 3.401340  | 2.215571  | -4.446111 |
| H  | 3.254622  | 4.643709  | 1.104436  | C | 3.057679  | 1.156839  | -2.607543 |
| N  | 2.302602  | -1.369944 | 1.928376  | H | 2.177463  | 1.728178  | -2.315335 |
| C  | 3.087938  | 2.511206  | 0.851456  | C | -0.880016 | -0.875790 | -2.840768 |
| N  | 4.058113  | -1.643481 | 0.010519  | H | 0.010494  | -0.298771 | -2.606861 |
| C  | 1.718562  | 2.472226  | 0.370097  | C | -0.993600 | -1.627804 | -4.004938 |
| N  | 3.433347  | 0.191515  | -1.757224 | H | -0.179980 | -1.633619 | -4.724511 |
| C  | 0.799620  | 3.456214  | 0.000097  | C | -2.152089 | -2.364882 | -4.221177 |
| H  | 0.941131  | 4.530092  | -0.003979 | H | -2.271193 | -2.964029 | -5.120484 |
| N  | -1.851302 | -0.833808 | -1.920263 | C | -3.164283 | -2.329164 | -3.266241 |
| C  | -0.341835 | 2.741116  | -0.366486 | H | -4.076626 | -2.901365 | -3.414146 |
| N  | -3.642674 | -0.656655 | -0.025410 | C | -2.996751 | -1.559543 | -2.119706 |
| C  | -1.652296 | 3.125631  | -0.857575 | C | -4.008427 | -1.450623 | -1.061821 |
| N  | -2.607324 | 0.980943  | 1.744871  | C | -5.264128 | -2.053700 | -1.049614 |
| C  | -1.999656 | 4.428709  | -1.215723 | H | -5.622859 | -2.703112 | -1.843635 |
| H  | -1.274063 | 5.231264  | -1.106655 | C | -6.084123 | -1.802702 | 0.040689  |
| C  | -3.267862 | 4.682773  | -1.721041 | C | -5.709266 | -0.979435 | 1.092917  |
| H  | -3.552125 | 5.692398  | -2.007797 | H | -6.404886 | -0.820632 | 1.912468  |
| C  | -4.166017 | 3.626001  | -1.863423 | C | -4.444603 | -0.399214 | 1.036674  |
| H  | -5.163126 | 3.780209  | -2.265777 | C | -3.862477 | 0.515153  | 2.028498  |
| C  | -3.761403 | 2.357107  | -1.477252 | C | -4.527832 | 0.914269  | 3.184799  |
| H  | -4.432554 | 1.503183  | -1.567007 | H | -5.524586 | 0.538237  | 3.401010  |
| C  | 1.361174  | -1.173410 | 2.860346  | C | -3.909187 | 1.798790  | 4.062813  |
| H  | 0.635298  | -0.397225 | 2.633817  | H | -4.420371 | 2.117544  | 4.967904  |
| C  | 1.300961  | -1.927937 | 4.026162  | C | -2.633762 | 2.266640  | 3.763876  |
| H  | 0.519016  | -1.734381 | 4.754765  | H | -2.117247 | 2.959285  | 4.422578  |
| C  | 2.247981  | -2.924618 | 4.231901  | C | -2.018057 | 1.832424  | 2.595030  |
| H  | 2.228170  | -3.533535 | 5.132324  | H | -1.020368 | 2.166847  | 2.313921  |
| C  | 3.226038  | -3.137519 | 3.265234  | N | -7.431228 | -2.438633 | 0.080645  |
| H  | 3.972016  | -3.915420 | 3.405658  | O | -7.716087 | -3.153794 | -0.867459 |
| C  | 3.239304  | -2.352741 | 2.116464  | O | -8.117332 | -2.181049 | 1.057825  |

### Min-1 (3+ quintet)

E= -2748.788 61 a.u.

|    |           |           |           |   |           |           |           |
|----|-----------|-----------|-----------|---|-----------|-----------|-----------|
| Ru | 2.521182  | -0.391859 | 0.067006  | C | 4.251269  | -2.519077 | 0.978667  |
| N  | 3.678780  | 1.268171  | 1.011368  | C | 5.330986  | -3.399619 | 0.930556  |
| O  | 1.396696  | -1.421600 | -0.814145 | H | 5.498821  | -4.121666 | 1.724885  |
| O  | -1.018844 | -1.129661 | 0.776885  | C | 6.199373  | -3.342132 | -0.157079 |
| C  | 4.927739  | 1.202129  | 1.504057  | H | 7.043917  | -4.024668 | -0.209461 |
| H  | 5.364777  | 0.205719  | 1.567420  | C | 5.999221  | -2.411455 | -1.174874 |
| Ru | -1.842505 | 0.172358  | -0.073266 | H | 6.686382  | -2.366856 | -2.015288 |
| N  | 1.145315  | 1.225477  | 0.249528  | C | 4.908769  | -1.547271 | -1.093828 |
| C  | 5.636690  | 2.320753  | 1.915755  | C | 4.551840  | -0.493995 | -2.055221 |
| H  | 6.641606  | 2.211976  | 2.313556  | C | 5.279179  | -0.232348 | -3.214029 |
| N  | -0.107287 | 1.396159  | -0.194745 | H | 6.155983  | -0.827470 | -3.455771 |
| C  | 5.030676  | 3.571246  | 1.804679  | C | 4.878169  | 0.794692  | -4.062379 |
| H  | 5.558289  | 4.470831  | 2.112427  | H | 5.440677  | 1.006044  | -4.968506 |
| N  | -2.535877 | 2.100582  | -0.961901 | C | 3.752382  | 1.542982  | -3.733648 |
| C  | 3.738359  | 3.653720  | 1.303164  | H | 3.407176  | 2.353792  | -4.369068 |
| H  | 3.235768  | 4.614274  | 1.218038  | C | 3.065523  | 1.237173  | -2.564652 |
| N  | 2.308750  | -1.430670 | 1.887332  | H | 2.178630  | 1.790834  | -2.259244 |
| C  | 3.076835  | 2.487235  | 0.918231  | C | -0.892812 | -0.860441 | -2.850029 |
| N  | 4.074590  | -1.634202 | -0.030680 | H | 0.001392  | -0.291444 | -2.610924 |
| C  | 1.711453  | 2.454878  | 0.425284  | C | -1.011923 | -1.599733 | -4.021797 |
| N  | 3.446539  | 0.250044  | -1.742449 | H | -0.199077 | -1.602303 | -4.742249 |
| C  | 0.794589  | 3.444292  | 0.064677  | C | -2.174316 | -2.328781 | -4.244026 |
| H  | 0.934367  | 4.518279  | 0.081848  | H | -2.297579 | -2.918149 | -5.149212 |
| N  | -1.862516 | -0.823204 | -1.927564 | C | -3.185030 | -2.297695 | -3.287362 |
| C  | -0.342126 | 2.734389  | -0.325899 | H | -4.100568 | -2.863551 | -3.439870 |
| N  | -3.651657 | -0.654118 | -0.030179 | C | -3.012040 | -1.540808 | -2.133205 |
| C  | -1.649505 | 3.126392  | -0.819193 | C | -4.022330 | -1.436366 | -1.073713 |
| N  | -2.607825 | 0.963030  | 1.753743  | C | -5.281899 | -2.031519 | -1.067122 |
| C  | -1.994340 | 4.434438  | -1.161381 | H | -5.644493 | -2.671407 | -1.867087 |
| H  | -1.269190 | 5.235150  | -1.036845 | C | -6.100795 | -1.784550 | 0.024852  |
| C  | -3.259153 | 4.695683  | -1.671419 | C | -5.721145 | -0.972639 | 1.084139  |
| H  | -3.541355 | 5.709147  | -1.946419 | H | -6.416293 | -0.815844 | 1.904465  |
| C  | -4.156573 | 3.641135  | -1.834054 | C | -4.452627 | -0.400404 | 1.033523  |
| H  | -5.150989 | 3.801137  | -2.240791 | C | -3.865205 | 0.501317  | 2.033703  |
| C  | -3.754894 | 2.367003  | -1.462436 | C | -4.527232 | 0.892067  | 3.194724  |
| H  | -4.425738 | 1.514594  | -1.567701 | H | -5.525908 | 0.519480  | 3.408000  |
| C  | 1.364230  | -1.267273 | 2.822886  | C | -3.902483 | 1.763416  | 4.081592  |
| H  | 0.633615  | -0.489527 | 2.617972  | H | -4.410972 | 2.075479  | 4.990522  |
| C  | 1.306031  | -2.056776 | 3.965473  | C | -2.624372 | 2.226388  | 3.786761  |
| H  | 0.521123  | -1.889507 | 4.697389  | H | -2.102899 | 2.908326  | 4.452678  |
| C  | 2.258203  | -3.053789 | 4.143662  | C | -2.012308 | 1.801219  | 2.612655  |
| H  | 2.239714  | -3.689676 | 5.025265  | H | -1.012889 | 2.132633  | 2.334263  |
| C  | 3.239740  | -3.231670 | 3.173611  | N | -7.452296 | -2.411588 | 0.058565  |
| H  | 3.990155  | -4.008801 | 3.292795  | O | -7.741606 | -3.116353 | -0.895952 |
| C  | 3.251030  | -2.412848 | 2.048919  | O | -8.137109 | -2.157972 | 1.037695  |

### Min-1 (4+ quartet)

E= -2748.291 22 a.u.

|    |           |           |           |    |           |           |           |
|----|-----------|-----------|-----------|----|-----------|-----------|-----------|
| Ru | -2.473604 | -0.421810 | 0.014968  | H  | -5.364917 | -0.146786 | -1.455843 |
| N  | -3.695664 | 1.039665  | -1.134472 | Ru | 1.820820  | 0.217476  | 0.056039  |
| O  | -1.254720 | -1.241152 | 0.912444  | N  | -1.158908 | 1.187912  | -0.442959 |
| O  | 0.921184  | -1.173855 | -0.429573 | C  | -5.697926 | 1.863938  | -2.170197 |
| C  | -4.952569 | 0.853605  | -1.581338 | H  | -6.707033 | 1.661802  | -2.518599 |

|   |           |           |           |   |           |           |           |
|---|-----------|-----------|-----------|---|-----------|-----------|-----------|
| N | 0.094148  | 1.450247  | -0.041863 | C | -5.790539 | -2.420283 | 1.676554  |
| C | -5.125217 | 3.128885  | -2.299137 | H | -6.445324 | -2.298817 | 2.535391  |
| H | -5.683674 | 3.945263  | -2.751510 | C | -4.775047 | -1.503888 | 1.411748  |
| N | 2.533887  | 2.274642  | 0.511816  | C | -4.468848 | -0.285572 | 2.172987  |
| C | -3.825010 | 3.332721  | -1.849317 | C | -5.190306 | 0.131156  | 3.287951  |
| H | -3.350084 | 4.305631  | -1.951376 | H | -6.017121 | -0.467993 | 3.660825  |
| N | -2.343978 | -1.626016 | -1.694974 | C | -4.854922 | 1.325542  | 3.920662  |
| C | -3.124807 | 2.273135  | -1.275986 | H | -5.418480 | 1.660691  | 4.788543  |
| N | -3.979539 | -1.696519 | 0.331707  | C | -3.798370 | 2.083611  | 3.423303  |
| C | -1.747771 | 2.358296  | -0.817573 | H | -3.510954 | 3.024069  | 3.885664  |
| N | -3.425203 | 0.467251  | 1.698928  | C | -3.108033 | 1.620223  | 2.310097  |
| C | -0.838018 | 3.406015  | -0.651228 | H | -2.275578 | 2.174826  | 1.879724  |
| H | -0.992225 | 4.458280  | -0.857755 | C | 1.031376  | 0.017926  | 3.051001  |
| N | 1.927983  | -0.269197 | 2.095677  | H | 0.165730  | 0.589843  | 2.725711  |
| C | 0.315469  | 2.789603  | -0.158917 | C | 1.193037  | -0.400461 | 4.366163  |
| N | 3.622411  | -0.646439 | 0.146440  | H | 0.444842  | -0.143988 | 5.110825  |
| C | 1.637020  | 3.263500  | 0.220073  | C | 2.318807  | -1.146069 | 4.703893  |
| N | 2.584625  | 0.635582  | -1.890611 | H | 2.473086  | -1.488912 | 5.724431  |
| C | 1.985571  | 4.608802  | 0.319757  | C | 3.255356  | -1.444141 | 3.717199  |
| H | 1.254654  | 5.378253  | 0.082592  | H | 4.144836  | -2.018565 | 3.964013  |
| C | 3.267113  | 4.953929  | 0.736083  | C | 3.049078  | -0.994584 | 2.417049  |
| H | 3.553634  | 5.999693  | 0.821032  | C | 3.999287  | -1.208044 | 1.322014  |
| C | 4.174192  | 3.942643  | 1.050506  | C | 5.219949  | -1.876364 | 1.397097  |
| H | 5.180872  | 4.171035  | 1.389662  | H | 5.588812  | -2.355019 | 2.301510  |
| C | 3.768891  | 2.622551  | 0.921188  | C | 5.994019  | -1.923789 | 0.247121  |
| H | 4.448199  | 1.802812  | 1.151707  | C | 5.615117  | -1.322995 | -0.945558 |
| C | -1.499779 | -1.478519 | -2.727068 | H | 6.281198  | -1.388193 | -1.802929 |
| H | -0.834634 | -0.620410 | -2.670259 | C | 4.386891  | -0.666518 | -0.973237 |
| C | -1.469193 | -2.373532 | -3.788601 | C | 3.811045  | 0.062792  | -2.109934 |
| H | -0.771962 | -2.218595 | -4.607070 | C | 4.456730  | 0.213696  | -3.333681 |
| C | -2.338760 | -3.460561 | -3.778849 | H | 5.429580  | -0.242278 | -3.500273 |
| H | -2.337898 | -4.179918 | -4.594536 | C | 3.854046  | 0.961450  | -4.342720 |
| C | -3.220218 | -3.615401 | -2.712091 | H | 4.354064  | 1.090362  | -5.300052 |
| H | -3.911422 | -4.454200 | -2.692934 | C | 2.612393  | 1.543938  | -4.104541 |
| C | -3.216593 | -2.686905 | -1.675951 | H | 2.113367  | 2.139535  | -4.864265 |
| C | -4.138025 | -2.726134 | -0.536587 | C | 2.010306  | 1.357439  | -2.865461 |
| C | -5.143462 | -3.663150 | -0.300998 | H | 1.040423  | 1.792447  | -2.628618 |
| H | -5.295953 | -4.501942 | -0.975053 | N | 7.306301  | -2.645394 | 0.298093  |
| C | -5.960399 | -3.507159 | 0.817825  | O | 7.593466  | -3.142370 | 1.373478  |
| H | -6.745951 | -4.232741 | 1.016661  | O | 7.942403  | -2.657077 | -0.741827 |

### TS-1 (3+ unrestricted singlet)

E= -2748.765 75 a.u.

|    |           |           |           |   |           |           |           |
|----|-----------|-----------|-----------|---|-----------|-----------|-----------|
| Ru | -2.271816 | -0.287042 | -0.192766 | N | 0.016265  | 1.689367  | 0.446497  |
| N  | -3.798300 | 1.297216  | -0.273707 | C | -5.592424 | 3.429702  | -0.217077 |
| O  | -0.769456 | -1.242610 | 0.256885  | H | -6.291996 | 4.261804  | -0.195208 |
| O  | 0.597001  | -0.784249 | -0.678360 | N | 2.454670  | 2.332960  | 0.987694  |
| C  | -5.099992 | 1.114926  | -0.559720 | C | -4.252235 | 3.633532  | 0.083342  |
| H  | -5.395125 | 0.096370  | -0.809486 | H | -3.883806 | 4.623527  | 0.341551  |
| Ru | 1.647057  | 0.441140  | 0.207855  | N | -2.097929 | -0.421682 | -2.287754 |
| N  | -1.264387 | 1.479666  | 0.177486  | C | -3.367293 | 2.556024  | 0.049252  |
| C  | -6.026218 | 2.146867  | -0.547731 | N | -3.388743 | -1.899099 | -0.566570 |
| H  | -7.065220 | 1.945407  | -0.792202 | C | -1.947190 | 2.646851  | 0.331470  |

|   |           |           |           |   |           |           |           |
|---|-----------|-----------|-----------|---|-----------|-----------|-----------|
| N | -3.048089 | -0.711077 | 1.732235  | H | -5.034574 | -3.163299 | 2.952437  |
| C | -1.049754 | 3.645429  | 0.729895  | C | -4.267846 | -1.514574 | 4.102576  |
| H | -1.264565 | 4.685844  | 0.940700  | H | -4.745012 | -1.830660 | 5.026897  |
| N | 1.708815  | -0.509632 | 2.086752  | C | -3.505952 | -0.350310 | 4.056134  |
| C | 0.188342  | 2.994610  | 0.794012  | H | -3.375998 | 0.275631  | 4.934972  |
| N | 3.305960  | -0.648263 | 0.030324  | C | -2.915239 | 0.013494  | 2.852827  |
| C | 1.553156  | 3.353887  | 1.128768  | H | -2.317224 | 0.919280  | 2.758547  |
| N | 2.370749  | 1.092945  | -1.671761 | C | 0.863796  | -0.350038 | 3.114221  |
| C | 1.956986  | 4.615105  | 1.566960  | H | 0.066831  | 0.372247  | 2.951734  |
| H | 1.220807  | 5.408504  | 1.671988  | C | 0.994460  | -1.051783 | 4.305315  |
| C | 3.293611  | 4.841207  | 1.867256  | H | 0.290441  | -0.881591 | 5.115342  |
| H | 3.620525  | 5.819704  | 2.210695  | C | 2.043184  | -1.956656 | 4.438384  |
| C | 4.207493  | 3.798300  | 1.723628  | H | 2.178722  | -2.520565 | 5.357959  |
| H | 5.261271  | 3.932674  | 1.950314  | C | 2.928474  | -2.125775 | 3.378150  |
| C | 3.746632  | 2.568288  | 1.279587  | H | 3.758555  | -2.822293 | 3.464666  |
| H | 4.425820  | 1.726277  | 1.150559  | C | 2.748796  | -1.392232 | 2.209050  |
| C | -1.439683 | 0.406241  | -3.110355 | C | 3.642622  | -1.481653 | 1.046293  |
| H | -0.957899 | 1.253349  | -2.627116 | C | 4.753812  | -2.308746 | 0.918105  |
| C | -1.376503 | 0.203623  | -4.482233 | H | 5.076860  | -3.000722 | 1.691210  |
| H | -0.838345 | 0.907690  | -5.111081 | C | 5.469394  | -2.241382 | -0.270407 |
| C | -2.022156 | -0.903085 | -5.025166 | C | 5.125540  | -1.387627 | -1.306676 |
| H | -1.997432 | -1.092124 | -6.095525 | H | 5.729211  | -1.383126 | -2.210263 |
| C | -2.711636 | -1.765666 | -4.178980 | C | 4.007077  | -0.575173 | -1.127805 |
| H | -3.227096 | -2.631939 | -4.585435 | C | 3.496211  | 0.422915  | -2.072117 |
| C | -2.743037 | -1.511089 | -2.810723 | C | 4.124590  | 0.734275  | -3.276686 |
| C | -3.462456 | -2.350849 | -1.841279 | H | 5.017437  | 0.194376  | -3.581865 |
| C | -4.184562 | -3.509412 | -2.116098 | C | 3.614920  | 1.750664  | -4.076064 |
| H | -4.260740 | -3.894397 | -3.129350 | H | 4.101875  | 2.005911  | -5.013973 |
| C | -4.808408 | -4.180291 | -1.064463 | C | 2.486487  | 2.444275  | -3.646848 |
| H | -5.370990 | -5.089045 | -1.263004 | H | 2.069479  | 3.260712  | -4.230468 |
| C | -4.717944 | -3.693633 | 0.236745  | C | 1.896990  | 2.083907  | -2.441597 |
| H | -5.207932 | -4.220264 | 1.051181  | H | 1.018129  | 2.599651  | -2.056335 |
| C | -3.990195 | -2.526740 | 0.471744  | O | 7.248459  | -3.031722 | -1.503242 |
| C | -3.817400 | -1.844073 | 1.759688  | N | 6.656144  | -3.124291 | -0.438775 |
| C | -4.426500 | -2.262397 | 2.941705  | O | 6.920695  | -3.855374 | 0.503620  |

### TS-1 (3+ triplet)

E= -2748.764 44 a.u.

|    |           |           |           |   |           |           |           |
|----|-----------|-----------|-----------|---|-----------|-----------|-----------|
| Ru | -2.273753 | -0.269521 | -0.211858 | H | -3.889236 | 4.572967  | 0.748997  |
| N  | -3.808639 | 1.311967  | -0.152902 | N | -2.071541 | -0.205899 | -2.303573 |
| O  | -0.800971 | -1.299447 | 0.126194  | C | -3.374999 | 2.538633  | 0.274332  |
| O  | 0.642912  | -0.777422 | -0.715763 | N | -3.387671 | -1.838462 | -0.747809 |
| C  | -5.113056 | 1.154437  | -0.441772 | C | -1.952345 | 2.608669  | 0.548973  |
| H  | -5.409907 | 0.161162  | -0.776814 | N | -3.081809 | -0.870281 | 1.655553  |
| Ru | 1.646964  | 0.428285  | 0.232866  | C | -1.049834 | 3.582826  | 0.992957  |
| N  | -1.268801 | 1.456740  | 0.304585  | H | -1.264031 | 4.605461  | 1.278256  |
| C  | -6.039096 | 2.180595  | -0.332745 | N | 1.681330  | -0.626204 | 2.052728  |
| H  | -7.080205 | 2.000678  | -0.584963 | C | 0.192256  | 2.936930  | 0.984187  |
| N  | 0.018542  | 1.657550  | 0.549633  | N | 3.305280  | -0.653738 | 0.011582  |
| C  | -5.602226 | 3.430554  | 0.103748  | C | 1.558742  | 3.279207  | 1.329202  |
| H  | -6.301611 | 4.257101  | 0.203818  | N | 2.401508  | 1.189682  | -1.597040 |
| N  | 2.462403  | 2.271019  | 1.123552  | C | 1.961219  | 4.514023  | 1.838732  |
| C  | -4.259647 | 3.608791  | 0.408957  | H | 1.223457  | 5.297616  | 1.994214  |

|   |           |           |           |   |           |           |           |
|---|-----------|-----------|-----------|---|-----------|-----------|-----------|
| C | 3.298757  | 4.726374  | 2.144238  | C | -2.970088 | -0.251805 | 2.840257  |
| H | 3.624772  | 5.684110  | 2.542715  | H | -2.375998 | 0.661240  | 2.839294  |
| C | 4.215195  | 3.696675  | 1.934239  | C | 0.820495  | -0.523827 | 3.074183  |
| H | 5.269751  | 3.821252  | 2.162904  | H | 0.030506  | 0.212487  | 2.942658  |
| C | 3.755443  | 2.493649  | 1.421197  | C | 0.929609  | -1.296951 | 4.222541  |
| H | 4.436041  | 1.662706  | 1.238931  | H | 0.214560  | -1.172489 | 5.031191  |
| C | -1.395517 | 0.691943  | -3.032885 | C | 1.972473  | -2.213483 | 4.315953  |
| H | -0.928754 | 1.493594  | -2.464523 | H | 2.091645  | -2.832302 | 5.201915  |
| C | -1.299201 | 0.611684  | -4.415382 | C | 2.873006  | -2.324304 | 3.260631  |
| H | -0.746253 | 1.368004  | -4.965849 | H | 3.697714  | -3.030176 | 3.317555  |
| C | -1.930929 | -0.442108 | -5.068719 | C | 2.714752  | -1.521434 | 2.135008  |
| H | -1.881262 | -0.535438 | -6.150802 | C | 3.623252  | -1.547990 | 0.980498  |
| C | -2.638556 | -1.376608 | -4.319067 | C | 4.729833  | -2.374962 | 0.817528  |
| H | -3.142339 | -2.203132 | -4.813398 | H | 5.038301  | -3.113386 | 1.552599  |
| C | -2.701744 | -1.245782 | -2.934725 | C | 5.460126  | -2.244825 | -0.356830 |
| C | -3.437733 | -2.170759 | -2.059563 | C | 5.133675  | -1.330661 | -1.345930 |
| C | -4.151576 | -3.299815 | -2.452985 | H | 5.747403  | -1.279639 | -2.241320 |
| H | -4.209900 | -3.589104 | -3.498757 | C | 4.018629  | -0.521543 | -1.132969 |
| C | -4.790261 | -4.066679 | -1.478587 | C | 3.525062  | 0.532504  | -2.023770 |
| H | -5.346935 | -4.953764 | -1.769858 | C | 4.168763  | 0.905333  | -3.202542 |
| C | -4.720735 | -3.703830 | -0.136482 | H | 5.059627  | 0.374751  | -3.529050 |
| H | -5.220610 | -4.305872 | 0.617456  | C | 3.677119  | 1.970034  | -3.948145 |
| C | -4.000210 | -2.562482 | 0.217642  | H | 4.175704  | 2.272728  | -4.865613 |
| C | -3.847406 | -2.002837 | 1.565828  | C | 2.551976  | 2.650878  | -3.490332 |
| C | -4.471975 | -2.530766 | 2.694726  | H | 2.149586  | 3.504176  | -4.029901 |
| H | -5.076686 | -3.430259 | 2.612552  | C | 1.946874  | 2.228894  | -2.313317 |
| C | -4.333520 | -1.893595 | 3.922200  | H | 1.070765  | 2.732887  | -1.907114 |
| H | -4.822470 | -2.295807 | 4.806035  | O | 7.250976  | -2.972918 | -1.610495 |
| C | -3.577133 | -0.727094 | 3.995424  | N | 6.642165  | -3.125545 | -0.562325 |
| H | -3.463305 | -0.184862 | 4.930300  | O | 6.887364  | -3.915342 | 0.337030  |

### TS-1 (4+ doublet)

E= -2748.268 56 a.u.

|    |           |           |           |   |           |           |           |
|----|-----------|-----------|-----------|---|-----------|-----------|-----------|
| Ru | -2.279789 | 0.309654  | 0.159930  | N | -3.024524 | 0.746567  | -1.784785 |
| N  | -3.796582 | -1.241917 | 0.163499  | C | -1.033138 | -3.657077 | -0.619532 |
| O  | -0.765645 | 1.200951  | -0.327867 | H | -1.252080 | -4.701916 | -0.803344 |
| O  | 0.546804  | 0.793524  | 0.585347  | N | 1.842524  | 0.272690  | -2.111284 |
| C  | -5.112476 | -1.029938 | 0.353317  | C | 0.212840  | -3.025156 | -0.648065 |
| H  | -5.410062 | -0.002881 | 0.558531  | N | 3.334738  | 0.659958  | -0.010247 |
| Ru | 1.677094  | -0.470706 | -0.152126 | C | 1.585569  | -3.408525 | -0.911074 |
| N  | -1.247021 | -1.464493 | -0.150140 | N | 2.393264  | -0.970555 | 1.785548  |
| C  | -6.049556 | -2.052965 | 0.308590  | C | 1.991947  | -4.688532 | -1.287547 |
| H  | -7.099000 | -1.830289 | 0.481977  | H | 1.254155  | -5.481225 | -1.387219 |
| N  | 0.040499  | -1.698984 | -0.351054 | C | 3.336607  | -4.935344 | -1.537811 |
| C  | -5.617241 | -3.352928 | 0.044605  | H | 3.667277  | -5.928588 | -1.832607 |
| H  | -6.328686 | -4.174337 | 0.000147  | C | 4.252621  | -3.892251 | -1.406755 |
| N  | 2.493261  | -2.387317 | -0.777245 | H | 5.312646  | -4.043326 | -1.592348 |
| C  | -4.263281 | -3.584766 | -0.162015 | C | 3.791861  | -2.639677 | -1.023785 |
| H  | -3.896762 | -4.586834 | -0.372066 | H | 4.476400  | -1.801462 | -0.903291 |
| N  | -2.308953 | 0.374607  | 2.255104  | C | -1.806947 | -0.545462 | 3.097414  |
| C  | -3.364853 | -2.519008 | -0.099731 | H | -1.373717 | -1.425761 | 2.627201  |
| N  | -3.382893 | 1.953103  | 0.494553  | C | -1.845777 | -0.389205 | 4.475168  |
| C  | -1.935988 | -2.634697 | -0.299255 | H | -1.438467 | -1.162976 | 5.120337  |

|   |           |           |           |   |          |           |           |
|---|-----------|-----------|-----------|---|----------|-----------|-----------|
| C | -2.429314 | 0.759989  | 5.004260  | H | 0.638674 | 0.209749  | -5.253964 |
| H | -2.482976 | 0.910960  | 6.080060  | C | 2.287002 | 1.448606  | -4.592570 |
| C | -2.964096 | 1.710251  | 4.138090  | H | 2.466626 | 1.905615  | -5.563006 |
| H | -3.437597 | 2.604371  | 4.535637  | C | 3.087939 | 1.782629  | -3.503465 |
| C | -2.905726 | 1.501175  | 2.763934  | H | 3.896950 | 2.499342  | -3.620888 |
| C | -3.498627 | 2.401820  | 1.768402  | C | 2.858005 | 1.181217  | -2.269970 |
| C | -4.165260 | 3.598524  | 2.017135  | C | 3.684433 | 1.415848  | -1.080757 |
| H | -4.273001 | 3.980477  | 3.028903  | C | 4.762763 | 2.291144  | -0.981534 |
| C | -4.699426 | 4.309185  | 0.940984  | H | 5.097666 | 2.927326  | -1.797614 |
| H | -5.218635 | 5.248141  | 1.118731  | C | 5.433686 | 2.345263  | 0.232195  |
| C | -4.583427 | 3.817134  | -0.356675 | C | 5.084934 | 1.560386  | 1.320510  |
| H | -5.014149 | 4.368319  | -1.188407 | H | 5.661256 | 1.646033  | 2.238923  |
| C | -3.911368 | 2.612041  | -0.565528 | C | 4.000027 | 0.697829  | 1.170345  |
| C | -3.735937 | 1.915926  | -1.843127 | C | 3.489073 | -0.243592 | 2.170476  |
| C | -4.297002 | 2.345657  | -3.044370 | C | 4.086026 | -0.455061 | 3.410972  |
| H | -4.862251 | 3.273463  | -3.082391 | H | 4.956637 | 0.125949  | 3.705335  |
| C | -4.151644 | 1.570711  | -4.190425 | C | 3.575643 | -1.430109 | 4.263217  |
| H | -4.595012 | 1.893834  | -5.129486 | H | 4.041734 | -1.610607 | 5.229165  |
| C | -3.448522 | 0.371221  | -4.110532 | C | 2.476623 | -2.179186 | 3.851160  |
| H | -3.330628 | -0.272977 | -4.977968 | H | 2.063065 | -2.965421 | 4.477362  |
| C | -2.899637 | -0.003338 | -2.890320 | C | 1.915370 | -1.918527 | 2.606900  |
| H | -2.343610 | -0.932120 | -2.773702 | H | 1.060758 | -2.481682 | 2.235670  |
| C | 1.081813  | -0.053119 | -3.169025 | O | 7.134164 | 3.299162  | 1.460262  |
| H | 0.309211  | -0.795911 | -2.981340 | N | 6.588210 | 3.288348  | 0.370159  |
| C | 1.270654  | 0.511936  | -4.423162 | O | 6.855595 | 3.944718  | -0.622034 |

### TS-1 (4+ quartet)

E= -2748.268 52 a.u.

|    |           |           |           |   |           |           |           |
|----|-----------|-----------|-----------|---|-----------|-----------|-----------|
| Ru | -2.260703 | -0.322876 | -0.112455 | N | 3.322349  | -0.625530 | 0.095957  |
| N  | -3.777045 | 1.178614  | -0.559179 | C | 1.549513  | 3.485882  | 0.477774  |
| O  | -0.710552 | -1.161666 | 0.495521  | N | 2.314113  | 0.771523  | -1.866890 |
| O  | 0.543581  | -0.921440 | -0.460144 | C | 1.952681  | 4.805428  | 0.681526  |
| C  | -5.069564 | 0.928820  | -0.837584 | H | 1.220275  | 5.607538  | 0.627722  |
| H  | -5.365327 | -0.119013 | -0.852957 | C | 3.286299  | 5.079478  | 0.960470  |
| Ru | 1.639528  | 0.468767  | 0.127667  | H | 3.614530  | 6.103362  | 1.123863  |
| N  | -1.252453 | 1.459315  | -0.142739 | C | 4.194004  | 4.023269  | 1.030215  |
| C  | -5.990580 | 1.937062  | -1.089840 | H | 5.245028  | 4.194154  | 1.247279  |
| H  | -7.023535 | 1.680674  | -1.309298 | C | 3.737879  | 2.730408  | 0.808514  |
| N  | 0.013772  | 1.718763  | 0.144774  | H | 4.418463  | 1.881270  | 0.845679  |
| C  | -5.565715 | 3.264436  | -1.047342 | C | -1.624120 | -0.265960 | -3.150152 |
| H  | -6.264980 | 4.075882  | -1.235349 | H | -1.160356 | 0.685122  | -2.897912 |
| N  | 2.450565  | 2.450002  | 0.535308  | C | -1.629256 | -0.760814 | -4.447254 |
| C  | -4.233037 | 3.537543  | -0.763131 | H | -1.163528 | -0.190942 | -5.246740 |
| H  | -3.870955 | 4.562449  | -0.729283 | C | -2.249374 | -1.982045 | -4.697012 |
| N  | -2.193998 | -0.922289 | -2.127060 | H | -2.275772 | -2.397412 | -5.701801 |
| C  | -3.350383 | 2.483907  | -0.527112 | C | -2.853985 | -2.662472 | -3.643064 |
| N  | -3.395717 | -1.979731 | -0.070270 | H | -3.356972 | -3.609029 | -3.823879 |
| C  | -1.936291 | 2.640211  | -0.250567 | C | -2.825272 | -2.117569 | -2.363005 |
| N  | -3.021715 | -0.279615 | 1.871910  | C | -3.486608 | -2.723455 | -1.200599 |
| C  | -1.044931 | 3.696407  | -0.032094 | C | -4.187773 | -3.926639 | -1.172453 |
| H  | -1.258784 | 4.758269  | -0.047055 | H | -4.276358 | -4.545087 | -2.061684 |
| N  | 1.807577  | -0.084023 | 2.151987  | C | -4.781028 | -4.333352 | 0.022986  |
| C  | 0.186169  | 3.073313  | 0.210954  | H | -5.329988 | -5.271567 | 0.060584  |

|   |           |           |          |   |          |           |           |
|---|-----------|-----------|----------|---|----------|-----------|-----------|
| C | -4.682804 | -3.543186 | 1.167178 | C | 2.851370 | -0.940406 | 2.396517  |
| H | -5.155446 | -3.863721 | 2.091762 | C | 3.691638 | -1.260955 | 1.236082  |
| C | -3.971567 | -2.345833 | 1.100754 | C | 4.798246 | -2.105795 | 1.222116  |
| C | -3.787194 | -1.373158 | 2.183474 | H | 5.151161 | -2.650097 | 2.095110  |
| C | -4.376394 | -1.493122 | 3.439968 | C | 5.475112 | -2.253182 | 0.019129  |
| H | -4.985134 | -2.361811 | 3.677804 | C | 5.103259 | -1.592140 | -1.141782 |
| C | -4.200531 | -0.486204 | 4.384516 | H | 5.684343 | -1.749949 | -2.047499 |
| H | -4.666196 | -0.567343 | 5.364055 | C | 3.988587 | -0.757490 | -1.077474 |
| C | -3.437622 | 0.629228  | 4.048908 | C | 3.441541 | 0.053247  | -2.170535 |
| H | -3.294272 | 1.447288  | 4.750015 | C | 4.031820 | 0.148311  | -3.428578 |
| C | -2.867328 | 0.693960  | 2.783626 | H | 4.927855 | -0.423395 | -3.657529 |
| H | -2.270644 | 1.549500  | 2.469957 | C | 3.480818 | 0.995294  | -4.386057 |
| C | 1.030921  | 0.310103  | 3.172865 | H | 3.940737 | 1.084402  | -5.367622 |
| H | 0.235050  | 1.005310  | 2.914973 | C | 2.347687 | 1.735718  | -4.060060 |
| C | 1.230887  | -0.130601 | 4.474898 | H | 1.899771 | 2.424530  | -4.771606 |
| H | 0.582932  | 0.223366  | 5.272224 | C | 1.796762 | 1.595267  | -2.791633 |
| C | 2.276093  | -1.013156 | 4.732317 | H | 0.916461 | 2.159814  | -2.486504 |
| H | 2.464152  | -1.374550 | 5.740734 | O | 7.214336 | -3.260883 | -1.108534 |
| C | 3.094186  | -1.418655 | 3.680146 | N | 6.662446 | -3.165137 | -0.025676 |
| H | 3.924746  | -2.095420 | 3.865052 | O | 6.946446 | -3.713840 | 1.025416  |

### Min-2 (3+ unrestricted singlet)

E= -2748.774 93 a.u.

|    |           |           |           |   |           |           |           |
|----|-----------|-----------|-----------|---|-----------|-----------|-----------|
| Ru | -2.270385 | -0.302598 | -0.103691 | C | 3.305266  | 5.133109  | 0.814106  |
| N  | -3.811549 | 1.191403  | -0.273641 | H | 3.642364  | 6.156286  | 0.961163  |
| O  | -0.572423 | -1.093613 | 0.421561  | C | 4.219950  | 4.081288  | 0.791010  |
| O  | 0.421762  | -0.849060 | -0.510330 | H | 5.284994  | 4.252634  | 0.918309  |
| C  | -5.120469 | 0.920860  | -0.430804 | C | 3.747651  | 2.792261  | 0.597741  |
| H  | -5.386287 | -0.133758 | -0.485755 | H | 4.425817  | 1.940717  | 0.568306  |
| Ru | 1.648614  | 0.535800  | 0.109134  | C | -1.768069 | 0.085289  | -3.156408 |
| N  | -1.282148 | 1.506659  | -0.019546 | H | -1.310990 | 1.015446  | -2.824376 |
| C  | -6.086029 | 1.911712  | -0.521038 | C | -1.824489 | -0.270595 | -4.497084 |
| H  | -7.129287 | 1.638628  | -0.651069 | H | -1.406464 | 0.389721  | -5.252122 |
| N  | 0.002688  | 1.776424  | 0.153787  | C | -2.438481 | -1.469934 | -4.845485 |
| C  | -5.687395 | 3.244939  | -0.438102 | H | -2.507225 | -1.778309 | -5.885753 |
| H  | -6.419403 | 4.046302  | -0.502336 | C | -2.977427 | -2.268865 | -3.842196 |
| N  | 2.441223  | 2.510897  | 0.437999  | H | -3.468650 | -3.204827 | -4.095312 |
| C  | -4.340714 | 3.538328  | -0.271419 | C | -2.892595 | -1.860062 | -2.514099 |
| H  | -3.998847 | 4.568397  | -0.204401 | C | -3.453231 | -2.620622 | -1.387832 |
| N  | -2.277798 | -0.681927 | -2.181755 | C | -4.105616 | -3.848403 | -1.455091 |
| C  | -3.412483 | 2.500299  | -0.191714 | H | -4.244000 | -4.355779 | -2.405997 |
| N  | -3.296568 | -2.010620 | -0.186842 | C | -4.578948 | -4.428219 | -0.277833 |
| C  | -1.984320 | 2.673575  | -0.018710 | C | -4.407236 | -3.782833 | 0.942957  |
| N  | -2.840698 | -0.539500 | 1.901255  | H | -4.779446 | -4.236497 | 1.857562  |
| C  | -1.093126 | 3.738221  | 0.166036  | C | -3.753559 | -2.550482 | 0.969836  |
| H  | -1.321867 | 4.795691  | 0.215731  | C | -3.514835 | -1.707993 | 2.144686  |
| N  | 1.852994  | 0.026621  | 2.147588  | C | -3.974095 | -2.012915 | 3.425068  |
| C  | 0.161187  | 3.124176  | 0.271947  | H | -4.506693 | -2.943284 | 3.605038  |
| N  | 3.271574  | -0.613354 | 0.063182  | C | -3.764854 | -1.115878 | 4.465533  |
| C  | 1.536393  | 3.540637  | 0.459157  | H | -4.126922 | -1.342489 | 5.465230  |
| N  | 2.228667  | 0.723499  | -1.899417 | C | -3.103101 | 0.080496  | 4.201063  |
| C  | 1.954955  | 4.858034  | 0.645707  | H | -2.940617 | 0.820186  | 4.980608  |
| H  | 1.217389  | 5.656934  | 0.659297  | C | -2.658883 | 0.328132  | 2.909266  |



|   |           |           |           |   |           |           |           |
|---|-----------|-----------|-----------|---|-----------|-----------|-----------|
| H | -2.144268 | 1.251324  | 2.646227  | H | 5.486650  | -1.924528 | -2.133951 |
| C | 1.104686  | 0.448330  | 3.177626  | C | 3.877819  | -0.832558 | -1.131866 |
| H | 0.307982  | 1.143516  | 2.920000  | C | 3.304018  | -0.058075 | -2.233226 |
| C | 1.331425  | 0.039251  | 4.484996  | C | 3.824569  | -0.047808 | -3.526279 |
| H | 0.704452  | 0.417619  | 5.287842  | H | 4.677768  | -0.673858 | -3.775276 |
| C | 2.379397  | -0.840424 | 4.740383  | C | 3.259973  | 0.780463  | -4.488539 |
| H | 2.590167  | -1.176499 | 5.752609  | H | 3.663806  | 0.802543  | -5.497616 |
| C | 3.167142  | -1.277144 | 3.680130  | C | 2.185341  | 1.591823  | -4.132372 |
| H | 3.996812  | -1.956468 | 3.858688  | H | 1.730827  | 2.272084  | -4.847853 |
| C | 2.892871  | -0.830984 | 2.390373  | C | 1.701978  | 1.532859  | -2.832003 |
| C | 3.681858  | -1.211092 | 1.211937  | H | 0.869744  | 2.152173  | -2.500148 |
| C | 4.761929  | -2.086288 | 1.188304  | H | -5.086729 | -5.388596 | -0.315256 |
| H | 5.135874  | -2.596868 | 2.071721  | N | 6.528073  | -3.256929 | -0.089595 |
| C | 5.377233  | -2.316203 | -0.035667 | O | 7.033420  | -3.427325 | -1.188890 |
| C | 4.961753  | -1.705343 | -1.207949 | O | 6.854881  | -3.768714 | 0.970839  |

### Min-2 (3+ triplet)

E= -2748.771 56 a.u.

|    |           |           |           |   |           |           |           |
|----|-----------|-----------|-----------|---|-----------|-----------|-----------|
| Ru | -2.254154 | -0.242563 | -0.189014 | H | 4.424496  | 1.735393  | 1.078839  |
| N  | -3.824973 | 1.186873  | 0.174265  | C | -1.668744 | 1.257217  | -2.853187 |
| O  | -0.603917 | -1.279567 | -0.086139 | H | -1.254227 | 2.008348  | -2.182910 |
| O  | 0.533015  | -0.769562 | -0.728127 | C | -1.671280 | 1.420472  | -4.231810 |
| C  | -5.136018 | 0.968046  | -0.038921 | H | -1.250091 | 2.319669  | -4.673510 |
| H  | -5.395237 | -0.009679 | -0.442376 | C | -2.238828 | 0.424575  | -5.020967 |
| Ru | 1.630099  | 0.504509  | 0.260865  | H | -2.266010 | 0.520671  | -6.103609 |
| N  | -1.293847 | 1.425511  | 0.502079  | C | -2.787171 | -0.696124 | -4.405131 |
| C  | -6.109769 | 1.917514  | 0.228838  | H | -3.244186 | -1.478594 | -5.005309 |
| H  | -7.153976 | 1.690301  | 0.034107  | C | -2.757460 | -0.806336 | -3.017777 |
| N  | -0.003574 | 1.665674  | 0.673211  | C | -3.334041 | -1.938561 | -2.276201 |
| C  | -5.718562 | 3.151246  | 0.748242  | C | -3.934813 | -3.069518 | -2.822412 |
| H  | -6.457541 | 3.917128  | 0.970763  | H | -4.018689 | -3.193547 | -3.898685 |
| N  | 2.435146  | 2.298129  | 1.147455  | C | -4.424731 | -4.055215 | -1.965263 |
| C  | -4.371099 | 3.389834  | 0.979836  | C | -4.317016 | -3.905386 | -0.586352 |
| H  | -4.035165 | 4.341491  | 1.384755  | H | -4.697086 | -4.676523 | 0.078347  |
| N  | -2.187620 | 0.176751  | -2.251809 | C | -3.712822 | -2.754269 | -0.078152 |
| C  | -3.434449 | 2.397711  | 0.688416  | C | -3.537520 | -2.401704 | 1.333380  |
| N  | -3.247177 | -1.812010 | -0.930306 | C | -4.031657 | -3.164723 | 2.389877  |
| C  | -2.005048 | 2.524997  | 0.883841  | H | -4.542903 | -4.103094 | 2.190608  |
| N  | -2.889893 | -1.215969 | 1.566362  | C | -3.886482 | -2.712376 | 3.695680  |
| C  | -1.113227 | 3.501980  | 1.343855  | H | -4.275735 | -3.297769 | 4.524915  |
| H  | -1.347328 | 4.488331  | 1.725038  | C | -3.254770 | -1.491803 | 3.919346  |
| N  | 1.740508  | -0.569535 | 2.068887  | H | -3.143496 | -1.088985 | 4.922582  |
| C  | 0.150055  | 2.914902  | 1.199359  | C | -2.773299 | -0.778495 | 2.830142  |
| N  | 3.250107  | -0.612810 | -0.060429 | H | -2.280845 | 0.185312  | 2.948259  |
| C  | 1.525472  | 3.269933  | 1.480877  | C | 0.956758  | -0.443985 | 3.149746  |
| N  | 2.304108  | 1.254164  | -1.589582 | H | 0.184521  | 0.319942  | 3.078744  |
| C  | 1.939564  | 4.478550  | 2.041784  | C | 1.124416  | -1.219220 | 4.289670  |
| H  | 1.198340  | 5.231465  | 2.298984  | H | 0.472196  | -1.072632 | 5.146466  |
| C  | 3.290428  | 4.704380  | 2.266063  | C | 2.148080  | -2.161682 | 4.313879  |
| H  | 3.624615  | 5.642101  | 2.703315  | H | 2.313633  | -2.781057 | 5.191958  |
| C  | 4.210610  | 3.714370  | 1.921979  | C | 2.971848  | -2.293699 | 3.200094  |
| H  | 5.276444  | 3.851785  | 2.080207  | H | 3.784031  | -3.016192 | 3.204028  |
| C  | 3.742487  | 2.534608  | 1.365277  | C | 2.757266  | -1.487832 | 2.085972  |

|   |          |           |           |   |           |           |           |
|---|----------|-----------|-----------|---|-----------|-----------|-----------|
| C | 3.591153 | -1.532812 | 0.876649  | C | 3.457387  | 2.035913  | -4.005403 |
| C | 4.649452 | -2.402538 | 0.637249  | H | 3.907820  | 2.339653  | -4.947061 |
| H | 4.971164 | -3.161622 | 1.345095  | C | 2.383931  | 2.741580  | -3.467761 |
| C | 5.311604 | -2.290041 | -0.578791 | H | 1.976400  | 3.616133  | -3.968051 |
| C | 4.960405 | -1.354174 | -1.537886 | C | 1.839008  | 2.318495  | -2.262708 |
| H | 5.515978 | -1.318233 | -2.471196 | H | 1.005251  | 2.840713  | -1.796218 |
| C | 3.894971 | -0.503019 | -1.247195 | H | -4.892252 | -4.945560 | -2.377846 |
| C | 3.381126 | 0.573641  | -2.095662 | N | 6.440491  | -3.216124 | -0.864013 |
| C | 3.961314 | 0.945371  | -3.307080 | O | 6.987290  | -3.081100 | -1.948190 |
| H | 4.814831 | 0.394327  | -3.694078 | O | 6.709786  | -4.022327 | 0.013856  |

### Min-2 (4+ doublet)

E= -2748.277 97 a.u.

|    |           |           |           |   |           |           |           |
|----|-----------|-----------|-----------|---|-----------|-----------|-----------|
| Ru | 2.283559  | 0.301659  | -0.091569 | C | 2.840462  | 0.641364  | -4.931973 |
| N  | 3.813265  | -1.177475 | 0.043082  | H | 2.986099  | 0.764482  | -6.002753 |
| O  | 0.571348  | 1.141294  | 0.297428  | C | 3.242618  | 1.642673  | -4.052077 |
| O  | -0.422304 | 0.809848  | -0.569947 | H | 3.703735  | 2.550184  | -4.433544 |
| C  | 5.130330  | -0.910800 | -0.027118 | C | 3.068916  | 1.467769  | -2.682580 |
| H  | 5.403838  | 0.132123  | -0.176032 | C | 3.515421  | 2.427611  | -1.666512 |
| Ru | -1.672007 | -0.541789 | 0.117425  | C | 4.128817  | 3.656009  | -1.895376 |
| N  | 1.270686  | -1.472008 | 0.180298  | H | 4.305371  | 4.012879  | -2.906638 |
| C  | 6.098293  | -1.902152 | 0.072337  | C | 4.521284  | 4.430894  | -0.802692 |
| H  | 7.149224  | -1.635091 | -0.000267 | C | 4.314826  | 3.970527  | 0.494407  |
| N  | -0.024005 | -1.741689 | 0.277393  | H | 4.632914  | 4.570153  | 1.343168  |
| C  | 5.696122  | -3.223596 | 0.260999  | C | 3.699933  | 2.731942  | 0.682971  |
| H  | 6.432025  | -4.019990 | 0.344007  | C | 3.442341  | 2.068416  | 1.961293  |
| N  | -2.470617 | -2.483660 | 0.489103  | C | 3.854323  | 2.566536  | 3.196041  |
| C  | 4.338658  | -3.509670 | 0.345200  | H | 4.356872  | 3.528614  | 3.256244  |
| H  | 3.993747  | -4.529775 | 0.497157  | C | 3.641964  | 1.817120  | 4.347977  |
| N  | 2.490145  | 0.326121  | -2.191480 | H | 3.970722  | 2.192791  | 5.314113  |
| C  | 3.408930  | -2.475582 | 0.236239  | C | 3.020884  | 0.574945  | 4.240363  |
| N  | 3.310529  | 2.005145  | -0.394074 | H | 2.855195  | -0.050162 | 5.113841  |
| C  | 1.974303  | -2.636981 | 0.325014  | C | 2.619665  | 0.131508  | 2.986924  |
| N  | 2.810047  | 0.855462  | 1.871666  | H | 2.133275  | -0.832533 | 2.848884  |
| C  | 1.076561  | -3.691831 | 0.529012  | C | -1.363334 | -0.510631 | 3.205893  |
| H  | 1.306375  | -4.739594 | 0.680127  | H | -0.600512 | -1.258709 | 2.997967  |
| N  | -2.016930 | -0.028326 | 2.133794  | C | -1.647542 | -0.094284 | 4.499174  |
| C  | -0.182599 | -3.086317 | 0.494430  | H | -1.103281 | -0.521385 | 5.337281  |
| N  | -3.299148 | 0.641913  | -0.014926 | C | -2.650875 | 0.851729  | 4.696161  |
| C  | -1.561933 | -3.504557 | 0.625702  | H | -2.906170 | 1.191477  | 5.697355  |
| N  | -2.257909 | -0.806787 | -1.889144 | C | -3.342869 | 1.344314  | 3.592731  |
| C  | -1.981621 | -4.813757 | 0.860267  | H | -4.141643 | 2.069333  | 3.728314  |
| H  | -1.243174 | -5.605121 | 0.965817  | C | -3.019704 | 0.887882  | 2.318728  |
| C  | -3.340118 | -5.092355 | 0.955136  | C | -3.729018 | 1.286206  | 1.099185  |
| H  | -3.681308 | -6.108651 | 1.138021  | C | -4.772033 | 2.203200  | 1.011621  |
| C  | -4.255973 | -4.051375 | 0.810087  | H | -5.161232 | 2.751633  | 1.866411  |
| H  | -5.326543 | -4.225552 | 0.878017  | C | -5.333844 | 2.419158  | -0.239457 |
| C  | -3.783158 | -2.766429 | 0.575460  | C | -4.909638 | 1.749020  | -1.374848 |
| H  | -4.465330 | -1.926475 | 0.457134  | H | -5.401547 | 1.952674  | -2.323299 |
| C  | 2.117421  | -0.643047 | -3.046317 | C | -3.862968 | 0.838087  | -1.233065 |
| H  | 1.694683  | -1.536838 | -2.591246 | C | -3.294741 | -0.003065 | -2.285551 |
| C  | 2.271707  | -0.522711 | -4.420016 | C | -3.788703 | -0.062770 | -3.587056 |
| H  | 1.969270  | -1.336936 | -5.073159 | H | -4.613678 | 0.578386  | -3.887965 |

|   |           |           |           |   |           |           |           |
|---|-----------|-----------|-----------|---|-----------|-----------|-----------|
| C | -3.237271 | -0.964387 | -4.491344 | H | -0.936145 | -2.313851 | -2.386235 |
| H | -3.623469 | -1.027740 | -5.506025 | H | 4.999020  | 5.393983  | -0.966465 |
| C | -2.200939 | -1.794317 | -4.069865 | N | -6.447023 | 3.410376  | -0.364404 |
| H | -1.758050 | -2.527220 | -4.739196 | O | -6.902831 | 3.555373  | -1.486037 |
| C | -1.740179 | -1.684898 | -2.764110 | O | -6.776234 | 3.968577  | 0.668776  |

### Min-2 (4+ quartet)

E= -2748.271 86 a.u.

|    |           |           |           |   |           |           |           |
|----|-----------|-----------|-----------|---|-----------|-----------|-----------|
| Ru | 2.272943  | 0.265514  | -0.122115 | C | 3.377809  | 2.423946  | -1.772892 |
| N  | 3.839633  | -1.194406 | -0.072530 | C | 3.951079  | 3.664094  | -2.046168 |
| O  | 0.595864  | 1.269455  | 0.148419  | H | 4.044306  | 4.022557  | -3.067886 |
| O  | -0.516135 | 0.890340  | -0.552971 | C | 4.406318  | 4.447316  | -0.986559 |
| C  | 5.151162  | -0.943071 | -0.239422 | C | 4.293244  | 3.986849  | 0.322507  |
| H  | 5.422520  | 0.096175  | -0.416242 | H | 4.654544  | 4.594302  | 1.148120  |
| Ru | -1.654709 | -0.558859 | 0.167233  | C | 3.712308  | 2.739774  | 0.552693  |
| N  | 1.301130  | -1.466066 | 0.193888  | C | 3.538266  | 2.081744  | 1.847867  |
| C  | 6.112936  | -1.943403 | -0.196301 | C | 4.007495  | 2.588094  | 3.057737  |
| H  | 7.159634  | -1.690258 | -0.342193 | H | 4.506264  | 3.553540  | 3.087827  |
| N  | -0.011271 | -1.726578 | 0.391436  | C | 3.856569  | 1.843296  | 4.222795  |
| C  | 5.710213  | -3.257826 | 0.035290  | H | 4.231182  | 2.225793  | 5.169430  |
| H  | 6.441585  | -4.061679 | 0.076044  | C | 3.241025  | 0.595782  | 4.152500  |
| N  | -2.445132 | -2.468055 | 0.718376  | H | 3.127406  | -0.028840 | 5.034672  |
| C  | 4.358300  | -3.529333 | 0.215324  | C | 2.785568  | 0.141228  | 2.922355  |
| H  | 4.015573  | -4.545319 | 0.397207  | H | 2.311063  | -0.832422 | 2.813067  |
| N  | 2.316551  | 0.326719  | -2.224570 | C | -1.160627 | -0.198944 | 3.209034  |
| C  | 3.436838  | -2.485735 | 0.158955  | H | -0.396669 | -0.953738 | 3.032691  |
| N  | 3.274336  | 1.996815  | -0.491387 | C | -1.385294 | 0.336160  | 4.470202  |
| C  | 2.004364  | -2.627180 | 0.338134  | H | -0.789493 | 0.000397  | 5.314780  |
| N  | 2.913656  | 0.864687  | 1.796426  | C | -2.393413 | 1.283739  | 4.628562  |
| C  | 1.114122  | -3.657888 | 0.653724  | H | -2.602014 | 1.716732  | 5.604192  |
| H  | 1.347088  | -4.700138 | 0.839056  | C | -3.149547 | 1.658122  | 3.521078  |
| N  | -1.878568 | 0.166621  | 2.133227  | H | -3.953051 | 2.382503  | 3.628683  |
| C  | -0.151874 | -3.045292 | 0.678157  | C | -2.884608 | 1.085229  | 2.280859  |
| N  | -3.295163 | 0.611004  | -0.000207 | C | -3.661026 | 1.361669  | 1.068255  |
| C  | -1.520295 | -3.467867 | 0.898623  | C | -4.704493 | 2.275653  | 0.948645  |
| N  | -2.322073 | -0.975363 | -1.789911 | H | -5.045969 | 2.906039  | 1.766469  |
| C  | -1.911602 | -4.758450 | 1.251228  | C | -5.328791 | 2.379847  | -0.286045 |
| H  | -1.160225 | -5.532119 | 1.391585  | C | -4.960664 | 1.609524  | -1.376856 |
| C  | -3.262109 | -5.041394 | 1.422505  | H | -5.493972 | 1.734473  | -2.316518 |
| H  | -3.582949 | -6.043081 | 1.698855  | C | -3.910677 | 0.708480  | -1.203650 |
| C  | -4.195873 | -4.023585 | 1.234009  | C | -3.384412 | -0.217616 | -2.206067 |
| H  | -5.260408 | -4.202704 | 1.359550  | C | -3.932206 | -0.390545 | -3.475093 |
| C  | -3.749257 | -2.756700 | 0.880436  | H | -4.777809 | 0.215231  | -3.791588 |
| H  | -4.445844 | -1.934973 | 0.724360  | C | -3.407524 | -1.358790 | -4.325138 |
| C  | 1.884758  | -0.644940 | -3.047846 | H | -3.836428 | -1.510677 | -5.312938 |
| H  | 1.485213  | -1.533624 | -2.563468 | C | -2.343770 | -2.141249 | -3.881937 |
| C  | 1.955086  | -0.531878 | -4.428993 | H | -1.922346 | -2.925729 | -4.505122 |
| H  | 1.605430  | -1.347205 | -5.056688 | C | -1.831201 | -1.919847 | -2.610341 |
| C  | 2.495152  | 0.626770  | -4.981801 | H | -1.008292 | -2.513075 | -2.215035 |
| H  | 2.572524  | 0.744617  | -6.060214 | H | 4.854719  | 5.418197  | -1.183595 |
| C  | 2.955168  | 1.630071  | -4.133969 | N | -6.443764 | 3.363888  | -0.445220 |
| H  | 3.396989  | 2.533084  | -4.547441 | O | -6.946193 | 3.419326  | -1.554928 |
| C  | 2.866404  | 1.463757  | -2.754868 | O | -6.728254 | 4.006701  | 0.551390  |

**TS-2 A (3+ unrestricted singlet)**

E= -2901.602 58 a.u.

|    |           |           |           |   |           |           |           |
|----|-----------|-----------|-----------|---|-----------|-----------|-----------|
| Ru | -1.657568 | -0.168492 | 0.389873  | C | -5.785257 | 0.600774  | -1.733551 |
| Ru | 2.495185  | 0.099374  | -0.250302 | C | -5.253117 | -0.676769 | -1.784827 |
| N  | -2.405293 | -0.789441 | 2.230360  | H | -5.782862 | -1.453705 | -2.329209 |
| O  | -0.056630 | -0.814343 | -1.031218 | C | -4.043999 | -0.893287 | -1.128304 |
| O  | 0.883610  | 0.134087  | -1.328995 | C | -3.323425 | -2.160427 | -1.022900 |
| C  | -3.700980 | -1.108860 | 2.432449  | C | -3.774521 | -3.365690 | -1.555043 |
| H  | -4.344413 | -1.083914 | 1.556847  | H | -4.708498 | -3.401559 | -2.110142 |
| N  | 0.039156  | -0.296942 | 1.619909  | C | -3.021862 | -4.518999 | -1.369732 |
| C  | -4.199173 | -1.447917 | 3.678179  | H | -3.363910 | -5.467285 | -1.776870 |
| H  | -5.250860 | -1.697713 | 3.784675  | C | -1.830602 | -4.440608 | -0.652457 |
| N  | 1.328232  | -0.027357 | 1.445896  | H | -1.217641 | -5.320983 | -0.479608 |
| C  | -3.332426 | -1.457846 | 4.771653  | C | -1.430406 | -3.210674 | -0.148099 |
| H  | -3.695611 | -1.714488 | 5.763731  | H | -0.506931 | -3.083866 | 0.411164  |
| N  | 3.906525  | 0.310724  | 1.360963  | C | 2.477525  | -2.955413 | 0.365636  |
| C  | -1.997326 | -1.141816 | 4.573530  | H | 1.798397  | -2.658351 | 1.163809  |
| H  | -1.291866 | -1.149025 | 5.400846  | C | 2.855925  | -4.278204 | 0.177511  |
| N  | -2.073397 | 1.817034  | 1.006130  | H | 2.472770  | -5.051801 | 0.837746  |
| C  | -1.542680 | -0.814735 | 3.294765  | C | 3.744699  | -4.579683 | -0.850320 |
| N  | -3.432191 | 0.126006  | -0.479633 | H | 4.069584  | -5.602717 | -1.023174 |
| C  | -0.178884 | -0.508376 | 2.951590  | C | 4.225681  | -3.548448 | -1.650498 |
| N  | -2.152257 | -2.093821 | -0.323212 | H | 4.927646  | -3.763251 | -2.452140 |
| C  | 1.023984  | -0.372194 | 3.648928  | C | 3.812441  | -2.239558 | -1.414877 |
| H  | 1.193814  | -0.486295 | 4.712454  | C | 4.285794  | -1.083117 | -2.191110 |
| N  | 2.929758  | -1.955030 | -0.405602 | C | 5.182497  | -1.107787 | -3.256256 |
| C  | 1.959129  | -0.069489 | 2.655863  | H | 5.606147  | -2.044798 | -3.607603 |
| N  | 3.775697  | 0.102740  | -1.773804 | C | 5.535037  | 0.092293  | -3.873452 |
| C  | 3.390191  | 0.157613  | 2.618771  | H | 6.233396  | 0.086507  | -4.706311 |
| N  | 2.647409  | 2.153455  | -0.663585 | C | 5.001945  | 1.296973  | -3.424463 |
| C  | 4.207900  | 0.228857  | 3.746466  | H | 5.283612  | 2.231143  | -3.903034 |
| H  | 3.772009  | 0.103928  | 4.734847  | C | 4.108705  | 1.282677  | -2.352772 |
| C  | 5.568052  | 0.461943  | 3.593995  | C | 3.467081  | 2.441512  | -1.725058 |
| H  | 6.216207  | 0.519313  | 4.465024  | C | 3.668150  | 3.758190  | -2.135890 |
| C  | 6.087330  | 0.625771  | 2.310834  | H | 4.321400  | 3.971963  | -2.978068 |
| H  | 7.144554  | 0.814192  | 2.147386  | C | 3.032970  | 4.796202  | -1.464634 |
| C  | 5.225037  | 0.544559  | 1.228173  | H | 3.184815  | 5.825846  | -1.778405 |
| H  | 5.587026  | 0.665306  | 0.208180  | C | 2.206482  | 4.494055  | -0.385672 |
| C  | -1.371529 | 2.595896  | 1.841361  | H | 1.694646  | 5.275498  | 0.169372  |
| H  | -0.487354 | 2.138712  | 2.283114  | C | 2.043651  | 3.164949  | -0.019533 |
| C  | -1.743195 | 3.901846  | 2.137589  | H | 1.413657  | 2.871374  | 0.818186  |
| H  | -1.144458 | 4.491785  | 2.826468  | O | -1.408378 | 1.527663  | -1.615180 |
| C  | -2.894282 | 4.418801  | 1.552370  | H | -1.664445 | 0.929536  | -2.358253 |
| H  | -3.218724 | 5.434859  | 1.763212  | H | -0.436627 | 1.540074  | -1.677070 |
| C  | -3.639708 | 3.608633  | 0.701699  | H | -1.08078  | -1.017121 | -2.739680 |
| H  | -4.550884 | 3.988754  | 0.247266  | O | -1.87538  | -0.661969 | -3.181215 |
| C  | -3.217201 | 2.308731  | 0.440875  | H | -1.73947  | -0.791317 | -4.130787 |
| C  | -3.973070 | 1.368612  | -0.396152 | N | -7.06818  | 0.870180  | -2.436900 |
| C  | -5.177498 | 1.637172  | -1.037595 | O | -7.56648  | -0.07517  | -3.02935  |
| H  | -5.659314 | 2.610716  | -1.017231 | O | -7.49835  | 2.010985  | -2.35476  |

**TS-2 A (3+ triplet)****E= -2901.597 46 a.u.**

|    |           |           |           |   |           |           |           |
|----|-----------|-----------|-----------|---|-----------|-----------|-----------|
| Ru | -1.676242 | -0.046858 | 0.414868  | C | -5.798009 | 0.153069  | -1.836806 |
| Ru | 2.511983  | 0.045451  | -0.257463 | C | -5.245856 | -1.094238 | -1.595261 |
| N  | -2.433118 | -0.224183 | 2.344146  | H | -5.760923 | -1.983225 | -1.948997 |
| O  | -0.011039 | -0.961129 | -0.814276 | C | -4.036915 | -1.136041 | -0.905413 |
| O  | 0.904402  | -0.051462 | -1.350219 | C | -3.293721 | -2.332428 | -0.515699 |
| C  | -3.728755 | -0.486506 | 2.618143  | C | -3.714018 | -3.635161 | -0.770479 |
| H  | -4.374987 | -0.659837 | 1.761539  | H | -4.643319 | -3.813506 | -1.305599 |
| N  | 0.022974  | 0.111002  | 1.638607  | C | -2.935442 | -4.701658 | -0.337775 |
| C  | -4.223352 | -0.529789 | 3.909481  | H | -3.253124 | -5.723858 | -0.528008 |
| H  | -5.275450 | -0.744617 | 4.073227  | C | -1.749361 | -4.440025 | 0.343908  |
| N  | 1.318861  | 0.306568  | 1.415421  | H | -1.116149 | -5.246556 | 0.703550  |
| C  | -3.353507 | -0.290689 | 4.974679  | C | -1.381747 | -3.120585 | 0.568917  |
| H  | -3.714623 | -0.311884 | 5.999902  | H | -0.464318 | -2.851736 | 1.086609  |
| N  | 3.912706  | 0.539636  | 1.292394  | C | 2.463884  | -2.806600 | 0.994839  |
| C  | -2.018765 | -0.032621 | 4.706263  | H | 1.827368  | -2.324404 | 1.735758  |
| H  | -1.310883 | 0.147215  | 5.511733  | C | 2.794505  | -4.152587 | 1.074029  |
| N  | -2.114349 | 2.024535  | 0.553731  | H | 2.419023  | -4.756853 | 1.895660  |
| C  | -1.567015 | -0.009488 | 3.385021  | C | 3.628305  | -4.694333 | 0.099444  |
| N  | -3.444275 | 0.014350  | -0.505606 | H | 3.915098  | -5.742548 | 0.133069  |
| C  | -0.200114 | 0.197044  | 2.983848  | C | 4.105231  | -3.871805 | -0.915808 |
| N  | -2.129179 | -2.086968 | 0.155038  | H | 4.765195  | -4.275287 | -1.679457 |
| C  | 1.005138  | 0.452610  | 3.642760  | C | 3.742303  | -2.527351 | -0.943499 |
| H  | 1.172655  | 0.563441  | 4.706992  | C | 4.215538  | -1.571974 | -1.955333 |
| N  | 2.912442  | -2.008287 | 0.014213  | C | 5.058579  | -1.848596 | -3.028346 |
| C  | 1.946782  | 0.511221  | 2.613448  | H | 5.434599  | -2.854216 | -3.196603 |
| N  | 3.763954  | -0.306622 | -1.765471 | C | 5.417799  | -0.814857 | -3.893057 |
| C  | 3.382870  | 0.683753  | 2.545273  | H | 6.073426  | -1.017933 | -4.735784 |
| N  | 2.762358  | 1.970225  | -1.054132 | C | 4.944838  | 0.475537  | -3.677143 |
| C  | 4.194673  | 0.981095  | 3.640890  | H | 5.230554  | 1.281763  | -4.347537 |
| H  | 3.748261  | 1.090893  | 4.626345  | C | 4.106035  | 0.715514  | -2.588025 |
| C  | 5.560989  | 1.139750  | 3.458111  | C | 3.542697  | 2.004211  | -2.180912 |
| H  | 6.204668  | 1.371861  | 4.303030  | C | 3.787812  | 3.206265  | -2.843006 |
| C  | 6.094025  | 1.002685  | 2.176455  | H | 4.408087  | 3.219293  | -3.735614 |
| H  | 7.157594  | 1.121313  | 1.990049  | C | 3.242321  | 4.386962  | -2.354415 |
| C  | 5.238338  | 0.706442  | 1.127336  | H | 3.429921  | 5.328992  | -2.863456 |
| H  | 5.609670  | 0.587291  | 0.110652  | C | 2.461681  | 4.342936  | -1.201887 |
| C  | -1.425885 | 2.986073  | 1.184158  | H | 2.024808  | 5.244871  | -0.782207 |
| H  | -0.533698 | 2.656721  | 1.714641  | C | 2.247735  | 3.118341  | -0.584880 |
| C  | -1.819441 | 4.318859  | 1.172839  | H | 1.648910  | 3.024537  | 0.318989  |
| H  | -1.231594 | 5.061994  | 1.704836  | O | -1.424395 | 1.137649  | -1.907550 |
| C  | -2.976859 | 4.668061  | 0.485191  | H | -1.655650 | 0.374426  | -2.491197 |
| H  | -3.317395 | 5.700164  | 0.455709  | H | -0.449946 | 1.148625  | -1.949807 |
| C  | -3.706572 | 3.672218  | -0.156274 | H | -1.00356  | -1.555626 | -2.371783 |
| H  | -4.621286 | 3.923648  | -0.686624 | O | -1.80221  | -1.373850 | -2.907895 |
| C  | -3.263638 | 2.353895  | -0.110390 | H | -1.61814  | -1.710587 | -3.796209 |
| C  | -4.002782 | 1.235193  | -0.709753 | N | -7.08179  | 0.234010  | -2.583178 |
| C  | -5.208708 | 1.330615  | -1.396088 | O | -7.56279  | -0.82962  | -2.94465  |
| H  | -5.704973 | 2.275496  | -1.599318 | O | -7.531    | 1.356169  | -2.7635   |

**TS-2 B (3+ unrestricted singlet)****E= -2901.603 11 a.u.**

|    |           |           |           |   |           |           |           |
|----|-----------|-----------|-----------|---|-----------|-----------|-----------|
| Ru | 2.307218  | -0.165155 | 0.128780  | C | 5.622705  | -1.635985 | 3.182840  |
| Ru | -1.843987 | 0.344022  | -0.309490 | H | 6.365402  | -1.969473 | 3.903116  |
| N  | 3.612303  | 0.421238  | -1.388987 | C | 5.127817  | -2.524449 | 2.234309  |
| O  | 0.398575  | -1.260737 | 0.304792  | H | 5.482816  | -3.551033 | 2.204382  |
| O  | -0.621313 | -0.571911 | 0.899792  | C | 4.170188  | -2.073355 | 1.326882  |
| C  | 4.921190  | 0.092477  | -1.406810 | C | 3.563203  | -2.837015 | 0.237368  |
| H  | 5.264856  | -0.556513 | -0.605616 | C | 3.881490  | -4.157671 | -0.070215 |
| N  | 1.078319  | 0.817830  | -1.264795 | H | 4.607159  | -4.697540 | 0.532640  |
| C  | 5.790895  | 0.550336  | -2.381127 | C | 3.266545  | -4.777687 | -1.150902 |
| H  | 6.835285  | 0.253736  | -2.348733 | H | 3.509423  | -5.807164 | -1.402295 |
| N  | -0.213762 | 1.122204  | -1.303463 | C | 2.342464  | -4.060133 | -1.906550 |
| C  | 5.301001  | 1.387300  | -3.384337 | H | 1.846257  | -4.506730 | -2.763806 |
| H  | 5.961153  | 1.767052  | -4.160211 | C | 2.061785  | -2.748138 | -1.551654 |
| N  | -2.708118 | 1.744287  | -1.693901 | H | 1.343739  | -2.139204 | -2.095375 |
| C  | 3.956061  | 1.722744  | -3.381562 | C | -1.530095 | -1.596768 | -2.729643 |
| H  | 3.537751  | 2.364839  | -4.152851 | H | -0.662586 | -0.976821 | -2.952437 |
| N  | 2.806423  | 1.650547  | 1.110338  | C | -1.900083 | -2.660855 | -3.542064 |
| C  | 3.118531  | 1.227569  | -2.380468 | H | -1.317230 | -2.893446 | -4.429440 |
| N  | 3.735127  | -0.794097 | 1.386700  | C | -3.033478 | -3.397303 | -3.208673 |
| C  | 1.702379  | 1.467681  | -2.291049 | H | -3.357185 | -4.231644 | -3.825953 |
| N  | 2.651747  | -2.144780 | -0.508651 | C | -3.758818 | -3.041272 | -2.076568 |
| C  | 0.764472  | 2.210850  | -3.012240 | H | -4.652938 | -3.596382 | -1.804127 |
| H  | 0.933141  | 2.828019  | -3.886078 | C | -3.340678 | -1.963366 | -1.300378 |
| N  | -2.218193 | -1.249481 | -1.630948 | C | -4.057315 | -1.498503 | -0.105408 |
| C  | -0.443121 | 1.961651  | -2.354920 | C | -5.208316 | -2.060374 | 0.436106  |
| N  | -3.500791 | -0.404494 | 0.479181  | H | -5.699490 | -2.934553 | 0.017311  |
| C  | -1.827382 | 2.342845  | -2.553357 | C | -5.744100 | -1.466427 | 1.571688  |
| N  | -2.192602 | 1.683081  | 1.272276  | C | -5.181040 | -0.347391 | 2.165618  |
| C  | -2.266878 | 3.245654  | -3.521429 | H | -5.650140 | 0.075079  | 3.050163  |
| H  | -1.545692 | 3.707342  | -4.191656 | C | -4.029598 | 0.180679  | 1.585721  |
| C  | -3.618901 | 3.546970  | -3.615582 | C | -3.290035 | 1.363430  | 2.030223  |
| H  | -3.974148 | 4.248773  | -4.366151 | C | -3.661499 | 2.145385  | 3.122736  |
| C  | -4.510585 | 2.940854  | -2.732120 | H | -4.535542 | 1.878687  | 3.711794  |
| H  | -5.575617 | 3.151502  | -2.768304 | C | -2.912786 | 3.269204  | 3.451484  |
| C  | -4.014693 | 2.051740  | -1.790931 | H | -3.194980 | 3.886625  | 4.300491  |
| H  | -4.675081 | 1.555589  | -1.081338 | C | -1.804406 | 3.590786  | 2.672136  |
| C  | 2.343851  | 2.883626  | 0.861190  | H | -1.196255 | 4.464522  | 2.890354  |
| H  | 1.653689  | 2.968159  | 0.023020  | C | -1.482203 | 2.775180  | 1.595709  |
| C  | 2.720591  | 3.990386  | 1.611758  | H | -0.631282 | 2.982903  | 0.949779  |
| H  | 2.322865  | 4.971842  | 1.367524  | O | 1.413579  | -0.138107 | 2.618298  |
| C  | 3.622030  | 3.812356  | 2.655946  | H | 1.452616  | -1.107379 | 2.803307  |
| H  | 3.943495  | 4.654560  | 3.263802  | H | 0.469722  | 0.005976  | 2.427950  |
| C  | 4.123653  | 2.538842  | 2.904411  | H | 0.834441  | -2.718426 | 1.639091  |
| H  | 4.840373  | 2.384517  | 3.706495  | O | 1.444819  | -2.864445 | 2.385022  |
| C  | 3.708525  | 1.466134  | 2.120941  | H | 1.034361  | -3.541047 | 2.942289  |
| C  | 4.227508  | 0.100219  | 2.278457  | N | -6.96946  | -2.053530 | 2.172271  |
| C  | 5.184181  | -0.312240 | 3.202028  | O | -7.40395  | -1.49414  | 3.168362  |
| H  | 5.592006  | 0.383975  | 3.929511  | O | -7.42444  | -3.04089  | 1.613116  |

### TS-2 B (3+ triplet)

E= -2901.597 59 a.u.

|    |           |           |           |   |          |           |           |
|----|-----------|-----------|-----------|---|----------|-----------|-----------|
| Ru | 2.331084  | 0.169846  | -0.130579 | N | 3.643180 | -0.529372 | 1.326264  |
| Ru | -1.855679 | -0.394637 | 0.278405  | O | 0.336582 | 1.211676  | -0.230710 |

|   |           |           |           |   |           |           |           |
|---|-----------|-----------|-----------|---|-----------|-----------|-----------|
| O | -0.658059 | 0.536306  | -0.938488 | C | 5.093226  | 2.771852  | -2.004635 |
| C | 4.951703  | -0.201334 | 1.377252  | H | 5.420287  | 3.801268  | -1.885987 |
| H | 5.297835  | 0.507452  | 0.629357  | C | 4.141917  | 2.220909  | -1.147212 |
| N | 1.098659  | -0.930066 | 1.167700  | C | 3.501509  | 2.873953  | -0.006116 |
| C | 5.817191  | -0.733499 | 2.316696  | C | 3.768222  | 4.177431  | 0.405256  |
| H | 6.861704  | -0.435417 | 2.312067  | H | 4.481703  | 4.786302  | -0.144027 |
| N | -0.195495 | -1.233838 | 1.195349  | C | 3.115418  | 4.693268  | 1.517916  |
| C | 5.324327  | -1.647948 | 3.248753  | H | 3.317078  | 5.709082  | 1.848766  |
| H | 5.981767  | -2.087167 | 3.994940  | C | 2.206680  | 3.889350  | 2.201907  |
| N | -2.691642 | -1.865442 | 1.602424  | H | 1.681482  | 4.253297  | 3.080827  |
| C | 3.980187  | -1.983291 | 3.213423  | C | 1.980911  | 2.598124  | 1.746875  |
| H | 3.559794  | -2.684276 | 3.930435  | H | 1.278618  | 1.924710  | 2.232266  |
| N | 2.861633  | -1.541645 | -1.269754 | C | -1.519061 | 1.364994  | 2.825384  |
| C | 3.146075  | -1.411054 | 2.250890  | H | -0.670876 | 0.706129  | 3.006381  |
| N | 3.741909  | 0.940342  | -1.318854 | C | -1.856694 | 2.387056  | 3.702484  |
| C | 1.728974  | -1.644248 | 2.146741  | H | -1.269791 | 2.544591  | 4.603636  |
| N | 2.606501  | 2.095007  | 0.672268  | C | -2.965680 | 3.178426  | 3.414634  |
| C | 0.795505  | -2.428991 | 2.828849  | H | -3.264228 | 3.982468  | 4.082836  |
| H | 0.968664  | -3.096673 | 3.663802  | C | -3.701052 | 2.917823  | 2.262891  |
| N | -2.217122 | 1.111980  | 1.707901  | H | -4.576414 | 3.517197  | 2.025558  |
| C | -0.415645 | -2.136741 | 2.198844  | C | -3.315978 | 1.876944  | 1.421416  |
| N | -3.511552 | 0.426557  | -0.442579 | C | -4.040227 | 1.502046  | 0.200639  |
| C | -1.796164 | -2.523187 | 2.400336  | C | -5.172145 | 2.126442  | -0.310915 |
| N | -2.276038 | -1.661329 | -1.344125 | H | -5.639596 | 2.988511  | 0.157199  |
| C | -2.220638 | -3.486690 | 3.316663  | C | -5.718787 | 1.615353  | -1.481394 |
| H | -1.488228 | -3.995157 | 3.939126  | C | -5.185249 | 0.516285  | -2.135155 |
| C | -3.571157 | -3.788779 | 3.417414  | H | -5.661926 | 0.158053  | -3.043771 |
| H | -3.914985 | -4.537355 | 4.127023  | C | -4.053024 | -0.078149 | -1.581555 |
| C | -4.478225 | -3.123336 | 2.592757  | C | -3.357736 | -1.262255 | -2.085410 |
| H | -5.543331 | -3.331926 | 2.637890  | C | -3.761945 | -1.979745 | -3.209892 |
| C | -3.997832 | -2.176121 | 1.702662  | H | -4.621955 | -1.649623 | -3.787185 |
| H | -4.669286 | -1.630739 | 1.041306  | C | -3.065555 | -3.122395 | -3.583251 |
| C | 2.424026  | -2.801417 | -1.138036 | H | -3.373721 | -3.691173 | -4.456881 |
| H | 1.719188  | -2.972411 | -0.325696 | C | -1.976612 | -3.528636 | -2.815753 |
| C | 2.841034  | -3.830719 | -1.972873 | H | -1.411978 | -4.422091 | -3.067682 |
| H | 2.463650  | -4.838541 | -1.822302 | C | -1.616319 | -2.772742 | -1.708400 |
| C | 3.753853  | -3.541900 | -2.981652 | H | -0.776054 | -3.045455 | -1.072985 |
| H | 4.105734  | -4.320744 | -3.653728 | O | 1.437437  | 0.339895  | -2.609457 |
| C | 4.225506  | -2.239824 | -3.112515 | H | 1.441832  | 1.323857  | -2.696435 |
| H | 4.949129  | -2.000081 | -3.886943 | H | 0.499495  | 0.144818  | -2.431940 |
| C | 3.772846  | -1.248555 | -2.246783 | H | 0.766845  | 2.733642  | -1.368073 |
| C | 4.260779  | 0.137897  | -2.280636 | O | 1.362991  | 3.024525  | -2.086787 |
| C | 5.212812  | 0.652115  | -3.156932 | H | 0.894399  | 3.723792  | -2.563922 |
| H | 5.642095  | 0.032116  | -3.939011 | N | -6.92324  | 2.272093  | -2.051808 |
| C | 5.617481  | 1.979676  | -3.020509 | O | -7.36787  | 1.784562  | -3.08054  |
| H | 6.355835  | 2.391792  | -3.703550 | O | -7.35195  | 3.238061  | -1.43746  |

### TS-2 A (4+ doublet)

E= -2901.123 02 a.u.

|    |           |           |           |   |           |           |           |
|----|-----------|-----------|-----------|---|-----------|-----------|-----------|
| Ru | -1.574768 | -0.279013 | 0.336872  | O | 0.767821  | 0.660245  | -0.999661 |
| Ru | 2.506066  | 0.152316  | -0.213597 | C | -3.593666 | -1.769038 | 2.082914  |
| N  | -2.301181 | -1.393676 | 1.971133  | H | -4.250972 | -1.501794 | 1.260341  |
| O  | -0.156239 | -0.330397 | -1.090705 | N | 0.129784  | -0.752982 | 1.501708  |

|   |           |           |           |   |           |           |           |
|---|-----------|-----------|-----------|---|-----------|-----------|-----------|
| C | -4.077243 | -2.449051 | 3.188646  | C | -3.221647 | -1.858662 | -1.540743 |
| H | -5.128776 | -2.719890 | 3.230825  | C | -3.652521 | -2.888252 | -2.375272 |
| N | 1.425980  | -0.487465 | 1.378312  | H | -4.580879 | -2.789088 | -2.932497 |
| C | -3.201712 | -2.765418 | 4.228179  | C | -2.894619 | -4.049829 | -2.477879 |
| H | -3.555854 | -3.294897 | 5.109605  | H | -3.223662 | -4.863473 | -3.119979 |
| N | 3.992630  | -0.230868 | 1.268798  | C | -1.719267 | -4.156950 | -1.738229 |
| C | -1.867680 | -2.401802 | 4.114355  | H | -1.107443 | -5.054007 | -1.780958 |
| H | -1.153501 | -2.645637 | 4.897241  | C | -1.332377 | -3.093992 | -0.931817 |
| N | -2.065804 | 1.430165  | 1.503688  | H | -0.420049 | -3.117353 | -0.340400 |
| C | -1.429434 | -1.722983 | 2.976677  | C | 2.610738  | -2.933741 | -0.574700 |
| N | -3.391735 | 0.189563  | -0.383326 | H | 2.082872  | -2.924056 | 0.378053  |
| C | -0.065095 | -1.348430 | 2.710984  | C | 2.941317  | -4.120327 | -1.214138 |
| N | -2.056295 | -1.969810 | -0.833610 | H | 2.677095  | -5.072285 | -0.761005 |
| C | 1.160375  | -1.473314 | 3.379217  | C | 3.638060  | -4.061002 | -2.418948 |
| H | 1.344385  | -1.913704 | 4.351582  | H | 3.924354  | -4.971016 | -2.941161 |
| N | 2.931015  | -1.728409 | -1.077815 | C | 3.986242  | -2.817678 | -2.938403 |
| C | 2.087059  | -0.918373 | 2.497754  | H | 4.546784  | -2.753677 | -3.867545 |
| N | 3.635154  | 0.662831  | -1.807150 | C | 3.633721  | -1.658591 | -2.252421 |
| C | 3.525862  | -0.741661 | 2.453134  | C | 4.014852  | -0.305774 | -2.676002 |
| N | 2.836609  | 2.205192  | 0.108458  | C | 4.731796  | 0.034410  | -3.820575 |
| C | 4.396796  | -1.043787 | 3.498652  | H | 5.049600  | -0.727015 | -4.527909 |
| H | 4.003418  | -1.447212 | 4.428777  | C | 5.046846  | 1.374182  | -4.048920 |
| C | 5.759575  | -0.819744 | 3.342145  | H | 5.605170  | 1.654763  | -4.938787 |
| H | 6.450218  | -1.050193 | 4.149899  | C | 4.663689  | 2.349869  | -3.133382 |
| C | 6.225755  | -0.293026 | 2.138520  | H | 4.926649  | 3.390658  | -3.303064 |
| H | 7.283206  | -0.102998 | 1.976022  | C | 3.950131  | 1.967422  | -1.996444 |
| C | 5.313566  | -0.011181 | 1.131358  | C | 3.514474  | 2.836961  | -0.902482 |
| H | 5.635038  | 0.397466  | 0.175068  | C | 3.805600  | 4.197371  | -0.822336 |
| C | -1.350986 | 1.970493  | 2.501307  | H | 4.346087  | 4.687652  | -1.628114 |
| H | -0.432463 | 1.449598  | 2.764143  | C | 3.422105  | 4.920613  | 0.301727  |
| C | -1.757363 | 3.118258  | 3.171881  | H | 3.653620  | 5.980469  | 0.376611  |
| H | -1.151724 | 3.515379  | 3.982036  | C | 2.756243  | 4.262403  | 1.332859  |
| C | -2.953563 | 3.723103  | 2.800547  | H | 2.456666  | 4.787441  | 2.235752  |
| H | -3.307697 | 4.616537  | 3.309644  | C | 2.483503  | 2.907741  | 1.198188  |
| C | -3.705454 | 3.158342  | 1.772718  | H | 1.972704  | 2.345374  | 1.977029  |
| H | -4.648827 | 3.610481  | 1.477234  | O | -1.556378 | 2.083089  | -1.126377 |
| C | -3.246170 | 2.011501  | 1.134777  | H | -2.061175 | 2.066311  | -1.977636 |
| C | -3.989005 | 1.318386  | 0.075804  | H | -0.624690 | 2.160207  | -1.381957 |
| C | -5.229567 | 1.691042  | -0.431337 | H | -3.08108  | 1.776846  | -4.166649 |
| H | -5.761684 | 2.582672  | -0.108686 | O | -3.28843  | 2.091907  | -3.274471 |
| C | -5.808477 | 0.871890  | -1.390917 | H | -3.64549  | 2.980619  | -3.425677 |
| C | -5.218964 | -0.301693 | -1.826880 | N | -7.12754  | 1.268638  | -1.969102 |
| H | -5.738347 | -0.918455 | -2.556486 | O | -7.60437  | 0.496639  | -2.78443  |
| C | -3.977822 | -0.634638 | -1.286919 | O | -7.58428  | 2.328067  | -1.5712   |

### TS-2 A (4+ quartet)

E= -2901.106 90 a.u.

|    |           |           |           |   |           |           |          |
|----|-----------|-----------|-----------|---|-----------|-----------|----------|
| Ru | -1.664579 | -0.611605 | 0.201430  | H | -4.338977 | -2.049991 | 0.657608 |
| Ru | 2.513658  | 0.276412  | -0.166896 | N | 0.073060  | -1.422836 | 0.951918 |
| N  | -2.353172 | -2.269217 | 1.214021  | C | -4.073344 | -3.759364 | 1.955923 |
| O  | -0.193560 | 0.073611  | -1.412199 | H | -5.125125 | -4.031927 | 1.942695 |
| O  | 0.868480  | 0.770388  | -1.098942 | N | 1.355238  | -1.044998 | 0.970722 |
| C  | -3.645746 | -2.655379 | 1.236177  | C | -3.139451 | -4.496396 | 2.684839 |



|   |           |           |           |   |           |           |           |
|---|-----------|-----------|-----------|---|-----------|-----------|-----------|
| H | -3.448396 | -5.365665 | 3.260578  | H | -4.588265 | -1.238721 | -3.938040 |
| N | 3.923231  | -0.621928 | 1.101170  | C | -3.035513 | -2.732076 | -3.984269 |
| C | -1.806774 | -4.107378 | 2.661901  | H | -3.367134 | -3.167830 | -4.923824 |
| H | -1.054111 | -4.664701 | 3.214476  | C | -1.937259 | -3.255134 | -3.305863 |
| N | -2.130867 | 0.474367  | 1.954543  | H | -1.391112 | -4.110460 | -3.693992 |
| C | -1.424228 | -2.991877 | 1.917313  | C | -1.546488 | -2.670622 | -2.108181 |
| N | -3.423267 | 0.234831  | -0.300791 | H | -0.694593 | -3.036191 | -1.538748 |
| C | -0.073346 | -2.497070 | 1.792942  | C | 2.732001  | -2.359615 | -1.825743 |
| N | -2.194749 | -1.622093 | -1.577250 | H | 2.062405  | -2.752296 | -1.061869 |
| C | 1.159962  | -2.818860 | 2.353529  | C | 3.202960  | -3.153354 | -2.864852 |
| H | 1.386704  | -3.611581 | 3.056043  | H | 2.905724  | -4.196616 | -2.928588 |
| N | 3.079480  | -1.070946 | -1.687495 | C | 4.065977  | -2.590352 | -3.799911 |
| C | 2.040275  | -1.880097 | 1.803311  | H | 4.457578  | -3.182945 | -4.623386 |
| N | 3.758325  | 1.417446  | -1.220999 | C | 4.434480  | -1.254715 | -3.661921 |
| C | 3.460714  | -1.629971 | 1.907507  | H | 5.115441  | -0.802621 | -4.378522 |
| N | 2.548780  | 2.035285  | 1.004415  | C | 3.938302  | -0.507191 | -2.597555 |
| C | 4.326495  | -2.318314 | 2.756973  | C | 4.306024  | 0.893804  | -2.347102 |
| H | 3.938595  | -3.116525 | 3.385203  | C | 5.150758  | 1.685578  | -3.123211 |
| C | 5.671252  | -1.973655 | 2.796993  | H | 5.604059  | 1.298425  | -4.031822 |
| H | 6.355164  | -2.503609 | 3.455819  | C | 5.413100  | 2.993394  | -2.716369 |
| C | 6.129333  | -0.937886 | 1.982740  | H | 6.071370  | 3.621153  | -3.312548 |
| H | 7.173014  | -0.635428 | 1.983794  | C | 4.845002  | 3.501725  | -1.547935 |
| C | 5.230290  | -0.289963 | 1.150347  | H | 5.061880  | 4.519963  | -1.235980 |
| H | 5.549254  | 0.515620  | 0.492889  | C | 4.003738  | 2.683172  | -0.797189 |
| C | -1.464336 | 0.462577  | 3.120239  | C | 3.332442  | 3.024782  | 0.464399  |
| H | -0.585158 | -0.178645 | 3.160642  | C | 3.475403  | 4.249831  | 1.109955  |
| C | -1.868584 | 1.210152  | 4.218885  | H | 4.101007  | 5.026722  | 0.677560  |
| H | -1.303336 | 1.158390  | 5.145776  | C | 2.821420  | 4.474034  | 2.318889  |
| C | -3.015102 | 1.992581  | 4.113324  | H | 2.934497  | 5.425649  | 2.832943  |
| H | -3.368901 | 2.579188  | 4.958005  | C | 2.033900  | 3.461795  | 2.858761  |
| C | -3.718853 | 1.997137  | 2.912815  | H | 1.515108  | 3.594532  | 3.804196  |
| H | -4.629452 | 2.583326  | 2.817513  | C | 1.926332  | 2.258979  | 2.171805  |
| C | -3.264945 | 1.230478  | 1.843761  | H | 1.331708  | 1.430675  | 2.551077  |
| C | -3.968510 | 1.126838  | 0.562897  | O | -1.366886 | 2.282194  | -0.143528 |
| C | -5.101431 | 1.841101  | 0.191163  | H | -2.029616 | 2.836412  | -0.623166 |
| H | -5.566789 | 2.591682  | 0.825067  | H | -0.555535 | 2.400429  | -0.656342 |
| C | -5.630180 | 1.601347  | -1.068414 | H | -3.17346  | 3.993843  | -2.458359 |
| C | -5.111807 | 0.648116  | -1.926902 | O | -3.33048  | 3.750882  | -1.533836 |
| H | -5.591330 | 0.478442  | -2.888007 | H | -3.65702  | 4.572892  | -1.137022 |
| C | -3.974797 | -0.040791 | -1.505900 | N | -6.77009  | 2.439208  | -1.532047 |
| C | -3.287698 | -1.113028 | -2.223977 | O | -7.29214  | 2.102783  | -2.58164  |
| C | -3.717026 | -1.650864 | -3.434708 | O | -7.04603  | 3.395421  | -0.82273  |

### TS-2 B (4+ doublet)

E= -2901.122 81 a.u.

|    |           |           |           |   |           |          |           |
|----|-----------|-----------|-----------|---|-----------|----------|-----------|
| Ru | 2.211662  | -0.173068 | -0.024544 | C | 5.749852  | 2.065378 | -1.305148 |
| Ru | -1.850021 | 0.553768  | -0.053107 | H | 6.798210  | 1.817962 | -1.448642 |
| N  | 3.553616  | 1.315867  | -0.699576 | N | -0.278811 | 1.796134 | -0.311317 |
| O  | 0.478406  | -1.038760 | -0.445733 | C | 5.274210  | 3.361569 | -1.504778 |
| O  | -0.499862 | -0.803174 | 0.471278  | H | 5.947065  | 4.158311 | -1.813179 |
| C  | 4.865622  | 1.074883  | -0.908455 | N | -2.772825 | 2.458076 | -0.336999 |
| H  | 5.207289  | 0.057983  | -0.737609 | C | 3.923895  | 3.615705 | -1.312091 |
| N  | 1.022730  | 1.544450  | -0.408421 | H | 3.514164  | 4.610010 | -1.472844 |

|   |           |           |           |   |           |           |           |
|---|-----------|-----------|-----------|---|-----------|-----------|-----------|
| N | 2.750919  | 0.450155  | 1.933899  | C | 3.178501  | -2.548363 | -4.180693 |
| C | 3.074608  | 2.581734  | -0.916461 | H | 3.418988  | -3.108329 | -5.081321 |
| N | 3.648465  | -1.496582 | 0.433720  | C | 2.294881  | -1.472543 | -4.226066 |
| C | 1.650293  | 2.703858  | -0.744592 | H | 1.830734  | -1.164175 | -5.158976 |
| N | 2.566325  | -1.118985 | -1.877197 | C | 2.012176  | -0.786875 | -3.052192 |
| C | 0.706689  | 3.733543  | -0.873982 | H | 1.324214  | 0.055069  | -3.024372 |
| H | 0.885762  | 4.767601  | -1.142299 | C | -1.665792 | 0.637707  | -3.152627 |
| N | -2.258574 | 0.096856  | -2.073559 | H | -0.904647 | 1.389505  | -2.948266 |
| C | -0.511239 | 3.116923  | -0.595206 | C | -2.007192 | 0.277522  | -4.449204 |
| N | -3.432037 | -0.691607 | 0.101392  | H | -1.512478 | 0.754288  | -5.291466 |
| C | -1.910914 | 3.497208  | -0.581217 | C | -3.006687 | -0.673553 | -4.641487 |
| N | -2.352362 | 0.710386  | 1.985012  | H | -3.307858 | -0.969458 | -5.643789 |
| C | -2.386006 | 4.791176  | -0.788855 | C | -3.635907 | -1.226923 | -3.529978 |
| H | -1.683761 | 5.599242  | -0.980041 | H | -4.432279 | -1.955568 | -3.660053 |
| C | -3.753782 | 5.034918  | -0.744385 | C | -3.256189 | -0.825182 | -2.252490 |
| H | -4.137945 | 6.039572  | -0.904511 | C | -3.903039 | -1.290162 | -1.021365 |
| C | -4.622917 | 3.975338  | -0.488985 | C | -4.930686 | -2.224542 | -0.931836 |
| H | -5.698521 | 4.123563  | -0.445677 | H | -5.350423 | -2.737941 | -1.793707 |
| C | -4.094529 | 2.707554  | -0.289419 | C | -5.436712 | -2.504223 | 0.330110  |
| H | -4.737232 | 1.852008  | -0.089755 | C | -4.973637 | -1.878089 | 1.475529  |
| C | 2.271902  | 1.501302  | 2.615517  | H | -5.425139 | -2.126617 | 2.433211  |
| H | 1.558802  | 2.127096  | 2.082444  | C | -3.944953 | -0.947421 | 1.330591  |
| C | 2.665871  | 1.786392  | 3.916964  | C | -3.349695 | -0.137344 | 2.392984  |
| H | 2.259367  | 2.654586  | 4.428708  | C | -3.784631 | -0.145744 | 3.716560  |
| C | 3.599072  | 0.956575  | 4.530087  | H | -4.578877 | -0.820839 | 4.025773  |
| H | 3.938120  | 1.154521  | 5.544285  | C | -3.214252 | 0.730265  | 4.634098  |
| C | 4.108947  | -0.127763 | 3.820498  | H | -3.553321 | 0.738767  | 5.667324  |
| H | 4.846350  | -0.779375 | 4.281841  | C | -2.221225 | 1.606413  | 4.202609  |
| C | 3.673819  | -0.368157 | 2.522032  | H | -1.766058 | 2.321152  | 4.882935  |
| C | 4.183225  | -1.457338 | 1.679385  | C | -1.819908 | 1.566186  | 2.873712  |
| C | 5.172036  | -2.373328 | 2.026343  | H | -1.055567 | 2.235859  | 2.485296  |
| H | 5.623540  | -2.355947 | 3.014702  | O | 1.439602  | -1.987571 | 2.013083  |
| C | 5.596127  | -3.308829 | 1.081899  | H | 1.637510  | -2.933952 | 1.802405  |
| H | 6.371310  | -4.025994 | 1.341877  | H | 0.473712  | -1.918885 | 1.993014  |
| C | 5.053933  | -3.308230 | -0.198853 | H | 1.841013  | -5.209400 | 0.998540  |
| H | 5.405238  | -4.017744 | -0.943310 | O | 2.340157  | -4.540695 | 1.489937  |
| C | 4.069553  | -2.371836 | -0.513055 | H | 2.592775  | -5.000031 | 2.305215  |
| C | 3.451858  | -2.160164 | -1.820865 | N | -6.52968  | -3.515283 | 0.456346  |
| C | 3.762420  | -2.891536 | -2.966254 | O | -6.93726  | -3.71745  | 1.588106  |
| H | 4.465959  | -3.718585 | -2.912709 | O | -6.8948   | -4.03427  | -0.58564  |

### TS-2 B (4+ quartet)

E= -2901.108 88 a.u.

|    |           |           |           |   |           |           |           |
|----|-----------|-----------|-----------|---|-----------|-----------|-----------|
| Ru | 2.246466  | -0.161909 | -0.108303 | N | -0.214862 | 1.777276  | -0.243045 |
| Ru | -1.788614 | 0.577036  | -0.048473 | C | 5.359565  | 3.341300  | -1.419520 |
| N  | 3.619038  | 1.276318  | -0.717374 | H | 6.041080  | 4.144018  | -1.690943 |
| O  | 0.436843  | -1.266226 | -0.649886 | N | -2.674769 | 2.515538  | -0.033636 |
| O  | -0.787706 | -1.171518 | -0.133865 | C | 4.009154  | 3.600323  | -1.225970 |
| C  | 4.930132  | 1.034480  | -0.915694 | H | 3.611730  | 4.605507  | -1.345908 |
| H  | 5.256453  | 0.006256  | -0.781292 | N | 2.717096  | 0.407628  | 1.890333  |
| N  | 1.089436  | 1.511248  | -0.434475 | C | 3.149072  | 2.557693  | -0.881052 |
| C  | 5.824569  | 2.034986  | -1.266896 | N | 3.577216  | -1.584426 | 0.408337  |
| H  | 6.872122  | 1.786777  | -1.415393 | C | 1.726073  | 2.682091  | -0.685427 |

|   |           |           |           |   |           |           |           |
|---|-----------|-----------|-----------|---|-----------|-----------|-----------|
| N | 2.627094  | -1.147658 | -1.942551 | C | 2.438887  | -1.491086 | -4.302377 |
| C | 0.796502  | 3.740997  | -0.662793 | H | 2.033547  | -1.159262 | -5.254202 |
| H | 0.989440  | 4.793159  | -0.836055 | C | 2.140618  | -0.790762 | -3.141197 |
| N | -2.385928 | 0.393007  | -2.059013 | H | 1.497237  | 0.086685  | -3.146040 |
| C | -0.420040 | 3.131708  | -0.381280 | C | -1.837695 | 1.039242  | -3.103098 |
| N | -3.435970 | -0.615079 | 0.080922  | H | -1.011766 | 1.709499  | -2.871455 |
| C | -1.800641 | 3.551719  | -0.238845 | C | -2.298090 | 0.872640  | -4.402889 |
| N | -2.100602 | 0.429224  | 2.031291  | H | -1.831410 | 1.424493  | -5.214525 |
| C | -2.245907 | 4.870856  | -0.295910 | C | -3.364952 | 0.008617  | -4.634833 |
| H | -1.533884 | 5.676224  | -0.460919 | H | -3.754149 | -0.137667 | -5.639777 |
| C | -3.600641 | 5.142321  | -0.138881 | C | -3.941564 | -0.656162 | -3.556683 |
| H | -3.963468 | 6.166673  | -0.180160 | H | -4.786291 | -1.322441 | -3.713486 |
| C | -4.483919 | 4.084729  | 0.072844  | C | -3.444850 | -0.448217 | -2.273041 |
| H | -5.549131 | 4.255335  | 0.203277  | C | -4.018284 | -1.043145 | -1.064179 |
| C | -3.983494 | 2.790770  | 0.116510  | C | -5.081044 | -1.943415 | -1.011322 |
| H | -4.637924 | 1.936078  | 0.277457  | H | -5.590927 | -2.321052 | -1.894662 |
| C | 2.314225  | 1.501430  | 2.554636  | C | -5.497628 | -2.370521 | 0.239772  |
| H | 1.671925  | 2.184536  | 2.000809  | C | -4.908478 | -1.927890 | 1.413650  |
| C | 2.697679  | 1.769730  | 3.862344  | H | -5.288117 | -2.292088 | 2.365512  |
| H | 2.356053  | 2.677516  | 4.353026  | C | -3.850255 | -1.027572 | 1.302648  |
| C | 3.541651  | 0.870965  | 4.507595  | C | -3.113280 | -0.413773 | 2.408565  |
| H | 3.870863  | 1.049997  | 5.528501  | C | -3.418957 | -0.603749 | 3.753727  |
| C | 3.979131  | -0.255448 | 3.817872  | H | -4.229140 | -1.270109 | 4.039738  |
| H | 4.654676  | -0.956657 | 4.300374  | C | -2.696733 | 0.078308  | 4.728228  |
| C | 3.562147  | -0.472855 | 2.507847  | H | -2.934388 | -0.056957 | 5.780817  |
| C | 4.030048  | -1.596373 | 1.686325  | C | -1.683116 | 0.947451  | 4.332219  |
| C | 4.915776  | -2.593018 | 2.089189  | H | -1.108849 | 1.513733  | 5.060570  |
| H | 5.292501  | -2.624769 | 3.107848  | C | -1.419325 | 1.099506  | 2.977669  |
| C | 5.334866  | -3.547972 | 1.162799  | H | -0.648628 | 1.776140  | 2.615399  |
| H | 6.032144  | -4.325520 | 1.465855  | O | 1.176030  | -1.871834 | 1.880344  |
| C | 4.883502  | -3.492948 | -0.151292 | H | 1.290579  | -2.770113 | 1.479135  |
| H | 5.227664  | -4.221381 | -0.880665 | H | 0.214840  | -1.760170 | 1.909063  |
| C | 3.989844  | -2.485555 | -0.513388 | H | 1.045102  | -4.658797 | 0.049896  |
| C | 3.449793  | -2.235976 | -1.849023 | O | 1.686973  | -4.302400 | 0.680942  |
| C | 3.769275  | -2.985503 | -2.979710 | H | 1.867971  | -5.046046 | 1.276093  |
| H | 4.423000  | -3.849942 | -2.894511 | N | -6.62782  | -3.345324 | 0.326670  |
| C | 3.260776  | -2.612421 | -4.218977 | O | -6.94698  | -3.68696  | 1.453278  |
| H | 3.511069  | -3.185108 | -5.108890 | O | -7.10682  | -3.69724  | -0.73825  |

### Min-3 A (3+ unrestricted singlet)

E= -2901.610 74 a.u.

|    |           |           |           |   |           |           |           |
|----|-----------|-----------|-----------|---|-----------|-----------|-----------|
| Ru | -1.801258 | -0.248959 | 0.313941  | H | -3.557086 | -3.637474 | 4.858326  |
| Ru | 2.560227  | 0.202572  | -0.250990 | N | 3.821064  | 0.259088  | 1.496572  |
| N  | -2.445435 | -1.536827 | 1.800567  | C | -1.947918 | -2.563174 | 3.916381  |
| O  | 0.314528  | -0.856485 | -1.488444 | H | -1.224941 | -2.763681 | 4.703404  |
| O  | 1.180168  | 0.155402  | -1.591112 | N | -2.279328 | 1.387519  | 1.559034  |
| C  | -3.699524 | -2.024649 | 1.884891  | C | -1.560068 | -1.811743 | 2.805930  |
| H  | -4.361712 | -1.784222 | 1.056076  | N | -3.587118 | 0.262909  | -0.406619 |
| N  | -0.025569 | -0.696717 | 1.366102  | C | -0.234462 | -1.289893 | 2.581717  |
| C  | -4.134193 | -2.783694 | 2.958092  | N | -2.216193 | -1.821194 | -1.031935 |
| H  | -5.155048 | -3.154224 | 2.976213  | C | 0.939017  | -1.246816 | 3.335099  |
| N  | 1.247393  | -0.289372 | 1.315957  | H | 1.104027  | -1.632047 | 4.333823  |
| C  | -3.243569 | -3.051068 | 3.998229  | N | 3.195278  | -1.773387 | -0.641373 |

|   |           |           |           |   |           |           |           |
|---|-----------|-----------|-----------|---|-----------|-----------|-----------|
| C | 1.853951  | -0.604329 | 2.500309  | H | -0.558671 | -2.978635 | -0.652657 |
| N | 3.991372  | 0.533056  | -1.588519 | C | 2.725022  | -2.913894 | -0.116486 |
| C | 3.253494  | -0.249290 | 2.629735  | H | 1.920454  | -2.798858 | 0.607957  |
| N | 2.560883  | 2.298761  | -0.339751 | C | 3.231443  | -4.161048 | -0.461398 |
| C | 3.990356  | -0.381968 | 3.806647  | H | 2.827288  | -5.057775 | 0.000182  |
| H | 3.515691  | -0.789027 | 4.696249  | C | 4.264567  | -4.229144 | -1.390385 |
| C | 5.321081  | 0.014358  | 3.830377  | H | 4.689900  | -5.186972 | -1.679889 |
| H | 5.906468  | -0.083323 | 4.741418  | C | 4.752578  | -3.050712 | -1.947068 |
| C | 5.891623  | 0.544090  | 2.674114  | H | 5.556725  | -3.085678 | -2.677493 |
| H | 6.926446  | 0.873618  | 2.652540  | C | 4.207752  | -1.828827 | -1.562595 |
| C | 5.108575  | 0.647158  | 1.534540  | C | 4.656798  | -0.532979 | -2.097802 |
| H | 5.511909  | 1.051599  | 0.607190  | C | 5.662084  | -0.326661 | -3.039082 |
| C | -1.594680 | 1.860698  | 2.612546  | H | 6.211171  | -1.163801 | -3.461654 |
| H | -0.692623 | 1.311163  | 2.876836  | C | 5.957978  | 0.976126  | -3.440523 |
| C | -2.004729 | 2.975893  | 3.332760  | H | 6.738678  | 1.150124  | -4.176511 |
| H | -1.419558 | 3.314323  | 4.183494  | C | 5.262709  | 2.053587  | -2.900500 |
| C | -3.171491 | 3.630203  | 2.950482  | H | 5.499905  | 3.067688  | -3.210902 |
| H | -3.524591 | 4.503373  | 3.493580  | C | 4.264881  | 1.808467  | -1.955874 |
| C | -3.892294 | 3.141396  | 1.866182  | C | 3.458305  | 2.805817  | -1.247150 |
| H | -4.813857 | 3.628853  | 1.558643  | C | 3.593368  | 4.181160  | -1.427509 |
| C | -3.435545 | 2.016324  | 1.184661  | H | 4.308183  | 4.567325  | -2.149779 |
| C | -4.161831 | 1.396865  | 0.070065  | C | 2.817859  | 5.056593  | -0.677101 |
| C | -5.359567 | 1.847973  | -0.476180 | H | 2.917972  | 6.130660  | -0.811279 |
| H | -5.864908 | 2.749558  | -0.141067 | C | 1.921582  | 4.534372  | 0.251737  |
| C | -5.924281 | 1.099705  | -1.499551 | H | 1.303374  | 5.183569  | 0.865410  |
| C | -5.350855 | -0.069908 | -1.971277 | C | 1.826042  | 3.156501  | 0.389327  |
| H | -5.842256 | -0.619976 | -2.769243 | H | 1.145720  | 2.695442  | 1.103953  |
| C | -4.151724 | -0.478677 | -1.391880 | H | -0.853046 | -0.458105 | -2.985625 |
| C | -3.398509 | -1.690851 | -1.706588 | O | -1.607047 | 0.099392  | -3.276355 |
| C | -3.840177 | -2.671528 | -2.590065 | H | -1.398574 | 0.399738  | -4.172848 |
| H | -4.781865 | -2.545334 | -3.118321 | O | -1.19685  | 1.396881  | -1.013313 |
| C | -3.073515 | -3.814337 | -2.782571 | H | -1.45209  | 1.112248  | -1.941724 |
| H | -3.407493 | -4.590526 | -3.466536 | H | -0.22276  | 1.419902  | -1.069887 |
| C | -1.881552 | -3.950027 | -2.076684 | N | -7.19761  | 1.568309  | -2.107957 |
| H | -1.258690 | -4.833232 | -2.187949 | O | -7.65817  | 0.87005   | -2.99869  |
| C | -1.488589 | -2.935325 | -1.213656 | O | -7.65936  | 2.607166  | -1.6593   |

### Min-3 A (3+ triplet)

E= -2901.607 29 a.u.

|    |           |           |           |   |           |           |           |
|----|-----------|-----------|-----------|---|-----------|-----------|-----------|
| Ru | -1.876897 | -0.160821 | 0.370048  | C | -1.960898 | -1.620518 | 4.383318  |
| Ru | 2.620536  | 0.143950  | -0.259120 | H | -1.216027 | -1.664896 | 5.174147  |
| N  | -2.509936 | -1.055202 | 2.109837  | N | -2.363705 | 1.718833  | 1.175787  |
| O  | 0.572096  | -1.213979 | -1.397700 | C | -1.599094 | -1.130662 | 3.126495  |
| O  | 1.217317  | -0.076559 | -1.671290 | N | -3.654433 | 0.137313  | -0.447791 |
| C  | -3.767682 | -1.488839 | 2.332831  | C | -0.271041 | -0.698922 | 2.769890  |
| H  | -4.453427 | -1.415996 | 1.491903  | N | -2.212829 | -1.995314 | -0.599979 |
| N  | -0.053565 | -0.379421 | 1.451242  | C | 0.903143  | -0.535847 | 3.502040  |
| C  | -4.177514 | -1.993532 | 3.555277  | H | 1.057598  | -0.706722 | 4.560211  |
| H  | -5.202716 | -2.330172 | 3.680351  | N | 3.340721  | -1.836519 | -0.317111 |
| N  | 1.236805  | -0.036057 | 1.321113  | C | 1.833656  | -0.113063 | 2.557208  |
| C  | -3.259146 | -2.053431 | 4.604296  | N | 4.037881  | 0.273049  | -1.649402 |
| H  | -3.553769 | -2.437967 | 5.577456  | C | 3.237072  | 0.223494  | 2.639079  |
| N  | 3.840692  | 0.462055  | 1.437635  | N | 2.594818  | 2.194443  | -0.677193 |

|   |           |           |           |   |           |           |           |
|---|-----------|-----------|-----------|---|-----------|-----------|-----------|
| C | 3.948180  | 0.327058  | 3.836669  | H | 2.133248  | -2.648854 | 1.143225  |
| H | 3.443418  | 0.134417  | 4.780323  | C | 3.468654  | -4.143372 | 0.309812  |
| C | 5.287447  | 0.686902  | 3.808778  | H | 3.107746  | -4.948564 | 0.943763  |
| H | 5.853083  | 0.772514  | 4.733248  | C | 4.478528  | -4.356046 | -0.624633 |
| C | 5.893864  | 0.942980  | 2.578731  | H | 4.928358  | -5.338750 | -0.742779 |
| H | 6.939211  | 1.230914  | 2.512421  | C | 4.910087  | -3.290514 | -1.406499 |
| C | 5.138633  | 0.819389  | 1.423414  | H | 5.696858  | -3.435993 | -2.142245 |
| H | 5.571313  | 1.002026  | 0.441252  | C | 4.332284  | -2.034208 | -1.239040 |
| C | -1.687341 | 2.438666  | 2.085701  | C | 4.721664  | -0.843405 | -2.002032 |
| H | -0.774285 | 1.980759  | 2.464076  | C | 5.691511  | -0.773711 | -3.000273 |
| C | -2.117830 | 3.682842  | 2.528967  | H | 6.251570  | -1.657851 | -3.292905 |
| H | -1.538828 | 4.221579  | 3.274165  | C | 5.936067  | 0.447533  | -3.624224 |
| C | -3.298196 | 4.208015  | 2.011683  | H | 6.688309  | 0.516021  | -4.405626 |
| H | -3.667030 | 5.177233  | 2.338060  | C | 5.222845  | 1.581222  | -3.245191 |
| C | -4.012046 | 3.465737  | 1.077183  | H | 5.417979  | 2.535558  | -3.727013 |
| H | -4.944410 | 3.849998  | 0.671329  | C | 4.262746  | 1.473545  | -2.239479 |
| C | -3.535161 | 2.220912  | 0.674686  | C | 3.447316  | 2.558916  | -1.688268 |
| C | -4.250322 | 1.342801  | -0.257973 | C | 3.528563  | 3.885322  | -2.107543 |
| C | -5.449850 | 1.630055  | -0.902395 | H | 4.208142  | 4.161888  | -2.909596 |
| H | -5.973007 | 2.576073  | -0.793162 | C | 2.743184  | 4.853606  | -1.493557 |
| C | -5.990446 | 0.652003  | -1.725241 | H | 2.802352  | 5.890641  | -1.814145 |
| C | -5.387619 | -0.582119 | -1.912572 | C | 1.891007  | 4.475186  | -0.459046 |
| H | -5.857586 | -1.309108 | -2.569415 | H | 1.268118  | 5.202930  | 0.053586  |
| C | -4.188467 | -0.822569 | -1.245958 | C | 1.849191  | 3.140876  | -0.081072 |
| C | -3.395675 | -2.051227 | -1.285850 | H | 1.207548  | 2.788411  | 0.724728  |
| C | -3.795440 | -3.209783 | -1.945846 | H | -0.715434 | -1.229267 | -2.910576 |
| H | -4.738466 | -3.232012 | -2.486231 | O | -1.512952 | -0.791191 | -3.272478 |
| C | -2.983985 | -4.336718 | -1.902462 | H | -1.335834 | -0.646509 | -4.213386 |
| H | -3.284287 | -5.249141 | -2.411420 | O | -1.2409   | 1.016004  | -1.348089 |
| C | -1.789349 | -4.277386 | -1.189682 | H | -1.4752   | 0.496860  | -2.173457 |
| H | -1.130567 | -5.138736 | -1.122689 | H | -0.26237  | 1.018131  | -1.395871 |
| C | -1.442066 | -3.093864 | -0.552253 | N | -7.26512  | 0.939680  | -2.433207 |
| H | -0.512997 | -2.985869 | 0.002605  | O | -7.70103  | 0.046058  | -3.14387  |
| C | 2.926562  | -2.870988 | 0.430961  | O | -7.75407  | 2.042766  | -2.23773  |

### Min-3 B (3+ unrestricted singlet)

E= -2901.611 14 a.u.

|    |           |           |           |   |           |           |           |
|----|-----------|-----------|-----------|---|-----------|-----------|-----------|
| Ru | 2.453492  | 0.133937  | -0.164213 | N | 3.054982  | -1.817494 | -0.722789 |
| Ru | -1.900683 | -0.267917 | 0.240475  | C | 3.052054  | -0.711843 | 2.602602  |
| N  | 3.607154  | -0.040657 | 1.548011  | N | 3.934859  | 0.535151  | -1.455061 |
| O  | 0.101027  | 1.592438  | -0.291176 | C | 1.662384  | -1.046456 | 2.418737  |
| O  | -0.886962 | 0.925481  | -0.901417 | N | 2.720863  | 2.214248  | 0.063820  |
| C  | 4.889215  | 0.367439  | 1.635915  | C | 0.718690  | -1.760144 | 3.157785  |
| H  | 5.280071  | 0.902302  | 0.773136  | H | 0.856309  | -2.258404 | 4.109569  |
| N  | 1.084972  | -0.567549 | 1.273551  | N | -2.402762 | 1.277360  | 1.584371  |
| C  | 5.674086  | 0.123272  | 2.749863  | C | -0.446641 | -1.671357 | 2.394673  |
| H  | 6.701228  | 0.475755  | 2.771593  | N | -3.623646 | 0.328256  | -0.522993 |
| N  | -0.198346 | -0.940277 | 1.266878  | C | -1.802976 | -2.154526 | 2.568044  |
| C  | 5.121923  | -0.578188 | 3.822419  | N | -2.124118 | -1.613278 | -1.351241 |
| H  | 5.715307  | -0.792049 | 4.707937  | C | -2.205709 | -3.008560 | 3.594449  |
| N  | -2.688298 | -1.722238 | 1.622120  | H | -1.481620 | -3.339066 | 4.335339  |
| C  | 3.801437  | -0.994395 | 3.746020  | C | -3.526935 | -3.432494 | 3.655199  |
| H  | 3.336926  | -1.533316 | 4.568247  | H | -3.853690 | -4.098067 | 4.450453  |

|   |           |           |           |   |           |           |           |
|---|-----------|-----------|-----------|---|-----------|-----------|-----------|
| C | -4.423310 | -2.997900 | 2.680623  | C | -2.161881 | 2.744666  | 3.461780  |
| H | -5.463196 | -3.311868 | 2.686340  | H | -1.574601 | 3.052346  | 4.322623  |
| C | -3.963063 | -2.146474 | 1.687293  | C | -3.372222 | 3.359152  | 3.156592  |
| H | -4.627893 | -1.779925 | 0.906430  | H | -3.756971 | 4.167534  | 3.773443  |
| C | 2.609333  | -2.989424 | -0.242788 | C | -4.091014 | 2.922734  | 2.047914  |
| H | 1.881073  | -2.925197 | 0.564103  | H | -5.037470 | 3.391884  | 1.791383  |
| C | 3.046719  | -4.213624 | -0.732419 | C | -3.592386 | 1.880174  | 1.272099  |
| H | 2.662596  | -5.135433 | -0.304203 | C | -4.279390 | 1.351848  | 0.084487  |
| C | 3.984299  | -4.227225 | -1.760178 | C | -5.488392 | 1.800842  | -0.435674 |
| H | 4.352591  | -5.166463 | -2.165569 | H | -6.060359 | 2.614713  | 0.001735  |
| C | 4.457660  | -3.017357 | -2.256080 | C | -5.974473 | 1.172122  | -1.575181 |
| H | 5.199811  | -3.007633 | -3.049953 | C | -5.307939 | 0.125503  | -2.192996 |
| C | 3.987512  | -1.819385 | -1.723959 | H | -5.742310 | -0.328939 | -3.079439 |
| C | 4.474599  | -0.499273 | -2.144152 | C | -4.101877 | -0.291746 | -1.633071 |
| C | 5.436482  | -0.249687 | -3.120479 | C | -3.257508 | -1.394947 | -2.095187 |
| H | 5.881479  | -1.064526 | -3.684796 | C | -3.571225 | -2.208551 | -3.182466 |
| C | 5.828543  | 1.064966  | -3.366649 | H | -4.473570 | -2.021460 | -3.759415 |
| H | 6.574414  | 1.273348  | -4.129408 | C | -2.731620 | -3.263507 | -3.518993 |
| C | 5.277959  | 2.108256  | -2.629835 | H | -2.969197 | -3.904817 | -4.363906 |
| H | 5.590359  | 3.133205  | -2.810682 | C | -1.591670 | -3.487607 | -2.750992 |
| C | 4.318295  | 1.816998  | -1.660546 | H | -0.914082 | -4.307068 | -2.974174 |
| C | 3.663006  | 2.764478  | -0.760127 | C | -1.326979 | -2.644450 | -1.680831 |
| C | 3.976535  | 4.118857  | -0.690006 | H | -0.452731 | -2.777176 | -1.045126 |
| H | 4.726037  | 4.539665  | -1.355341 | O | 1.367860  | -0.059802 | -2.066201 |
| C | 3.332656  | 4.924599  | 0.240981  | H | 1.421604  | 0.842996  | -2.502013 |
| H | 3.570939  | 5.983160  | 0.308405  | H | 0.412516  | -0.132400 | -1.875028 |
| C | 2.390084  | 4.351213  | 1.089824  | H | 0.768289  | 2.583449  | -1.814240 |
| H | 1.873397  | 4.943077  | 1.840140  | O | 1.345236  | 2.525931  | -2.606818 |
| C | 2.112486  | 2.996071  | 0.970737  | H | 0.871792  | 2.970369  | -3.324881 |
| H | 1.372082  | 2.497962  | 1.591560  | N | -7.26107  | 1.638659  | -2.153464 |
| C | -1.712934 | 1.710137  | 2.649571  | O | -7.64633  | 1.053418  | -3.15503  |
| H | -0.776040 | 1.189932  | 2.842870  | O | -7.8103   | 2.563374  | -1.57249  |

### Min-3 B (3+ triplet)

E= -2901.607 97 a.u.

|    |           |           |           |   |           |           |           |
|----|-----------|-----------|-----------|---|-----------|-----------|-----------|
| Ru | 2.536413  | 0.115391  | -0.169708 | N | 4.027337  | 0.465591  | -1.455525 |
| Ru | -1.954089 | -0.251846 | 0.254088  | C | 1.669024  | -0.873291 | 2.450797  |
| N  | 3.660977  | 0.015087  | 1.554482  | N | 2.752176  | 2.203236  | -0.048825 |
| O  | -0.115501 | 1.689011  | -0.382648 | C | 0.720283  | -1.526504 | 3.230164  |
| O  | -0.917516 | 0.837184  | -1.045580 | H | 0.850918  | -1.963846 | 4.212260  |
| C  | 4.952091  | 0.393672  | 1.646124  | N | -2.500691 | 1.355517  | 1.503344  |
| H  | 5.380222  | 0.849146  | 0.756081  | C | -0.441310 | -1.480432 | 2.458403  |
| N  | 1.100960  | -0.465103 | 1.264845  | N | -3.686393 | 0.262592  | -0.533021 |
| C  | 5.700633  | 0.213372  | 2.796676  | C | -1.787691 | -1.962053 | 2.676016  |
| H  | 6.737034  | 0.537825  | 2.819657  | N | -2.143255 | -1.690311 | -1.253503 |
| N  | -0.190552 | -0.826855 | 1.279819  | C | -2.164807 | -2.767137 | 3.752843  |
| C  | 5.102177  | -0.388651 | 3.904662  | H | -1.426251 | -3.046511 | 4.500408  |
| H  | 5.666819  | -0.549381 | 4.819643  | C | -3.475227 | -3.212069 | 3.849464  |
| N  | -2.690527 | -1.592744 | 1.719594  | H | -3.782916 | -3.840136 | 4.681795  |
| C  | 3.773024  | -0.773813 | 3.823548  | C | -4.387626 | -2.847464 | 2.859329  |
| H  | 3.272842  | -1.235077 | 4.671621  | H | -5.421957 | -3.177839 | 2.893684  |
| N  | 3.139148  | -1.848163 | -0.644352 | C | -3.956158 | -2.041126 | 1.817911  |
| C  | 3.061856  | -0.557809 | 2.641057  | H | -4.635822 | -1.725136 | 1.028424  |

|   |           |           |           |   |           |           |           |
|---|-----------|-----------|-----------|---|-----------|-----------|-----------|
| C | 2.683631  | -2.998376 | -0.121401 | C | -3.521436 | 3.487973  | 2.973967  |
| H | 1.939003  | -2.897947 | 0.666870  | H | -3.925014 | 4.316293  | 3.550961  |
| C | 3.129874  | -4.242454 | -0.548031 | C | -4.229111 | 2.980439  | 1.889705  |
| H | 2.736818  | -5.144799 | -0.087670 | H | -5.186800 | 3.412314  | 1.610203  |
| C | 4.087598  | -4.301147 | -1.555832 | C | -3.704763 | 1.912390  | 1.165903  |
| H | 4.462872  | -5.257386 | -1.911962 | C | -4.371811 | 1.305258  | 0.008818  |
| C | 4.571441  | -3.114437 | -2.095557 | C | -5.585570 | 1.697716  | -0.545566 |
| H | 5.328934  | -3.139095 | -2.874554 | H | -6.177717 | 2.521525  | -0.156358 |
| C | 4.091771  | -1.894294 | -1.626131 | C | -6.047669 | 0.998618  | -1.652721 |
| C | 4.582667  | -0.592415 | -2.094171 | C | -5.350345 | -0.063903 | -2.206549 |
| C | 5.554173  | -0.376491 | -3.069311 | H | -5.764609 | -0.574898 | -3.071534 |
| H | 6.013036  | -1.211120 | -3.592227 | C | -4.142454 | -0.424072 | -1.614648 |
| C | 5.934943  | 0.930073  | -3.369181 | C | -3.271077 | -1.528221 | -2.018205 |
| H | 6.688454  | 1.112830  | -4.130964 | C | -3.551357 | -2.389878 | -3.076932 |
| C | 5.359778  | 1.999895  | -2.690652 | H | -4.449867 | -2.246863 | -3.672012 |
| H | 5.660036  | 3.019122  | -2.918312 | C | -2.681182 | -3.434177 | -3.363969 |
| C | 4.391767  | 1.743023  | -1.719815 | H | -2.892221 | -4.113189 | -4.186156 |
| C | 3.700249  | 2.725258  | -0.884823 | C | -1.542817 | -3.597291 | -2.578092 |
| C | 3.977379  | 4.089294  | -0.893509 | H | -0.839940 | -4.404390 | -2.765180 |
| H | 4.732807  | 4.487764  | -1.565810 | C | -1.312538 | -2.708493 | -1.537452 |
| C | 3.286317  | 4.934813  | -0.034765 | H | -0.439019 | -2.789115 | -0.892169 |
| H | 3.493652  | 6.001991  | -0.031197 | O | 1.420392  | -0.058959 | -2.027733 |
| C | 2.334321  | 4.391417  | 0.823875  | H | 1.478896  | 0.830610  | -2.488473 |
| H | 1.777851  | 5.016553  | 1.516525  | H | 0.462963  | -0.094005 | -1.812883 |
| C | 2.098993  | 3.023931  | 0.789677  | H | 0.686032  | 2.580153  | -1.909941 |
| H | 1.352708  | 2.547642  | 1.421213  | O | 1.310505  | 2.508408  | -2.664318 |
| C | -1.821171 | 1.858009  | 2.545090  | H | 0.850075  | 2.879435  | -3.430980 |
| H | -0.867682 | 1.377221  | 2.758463  | N | -7.33749  | 1.403423  | -2.266021 |
| C | -2.295497 | 2.918484  | 3.306197  | O | -7.69852  | 0.758499  | -3.23994  |
| H | -1.714598 | 3.283587  | 4.148721  | O | -7.91509  | 2.343234  | -1.73905  |

### Min-3 A (4+ doublet)

E= -2901.130 99 a.u.

|    |           |           |           |   |           |           |           |
|----|-----------|-----------|-----------|---|-----------|-----------|-----------|
| Ru | -1.872018 | -0.346828 | 0.248994  | N | -2.268999 | -1.428447 | -1.507138 |
| Ru | 2.615219  | 0.279820  | -0.192161 | C | 0.899070  | -2.176937 | 2.755314  |
| N  | -2.504095 | -2.024576 | 1.270922  | H | 1.071902  | -2.843152 | 3.591743  |
| O  | 0.501824  | -0.318401 | -1.869823 | N | 3.334715  | -1.518924 | -1.061681 |
| O  | 1.303615  | 0.669094  | -1.556761 | C | 1.801723  | -1.286424 | 2.167247  |
| C  | -3.758942 | -2.516230 | 1.238417  | N | 4.097912  | 0.968096  | -1.341359 |
| H  | -4.451135 | -2.024749 | 0.558720  | C | 3.188540  | -0.974285 | 2.448580  |
| N  | -0.075497 | -1.061355 | 1.043245  | N | 2.645901  | 2.312086  | 0.339626  |
| C  | -4.155364 | -3.585349 | 2.026449  | C | 3.882627  | -1.441987 | 3.564375  |
| H  | -5.177311 | -3.949105 | 1.963221  | H | 3.390891  | -2.106630 | 4.270647  |
| N  | 1.200968  | -0.628368 | 1.129128  | C | 5.197835  | -1.041139 | 3.768460  |
| C  | -3.228346 | -4.169611 | 2.890270  | H | 5.752481  | -1.396036 | 4.633947  |
| H  | -3.513747 | -5.005419 | 3.524701  | C | 5.790805  | -0.171972 | 2.853251  |
| N  | 3.782067  | -0.139957 | 1.544639  | H | 6.813860  | 0.171214  | 2.981030  |
| C  | -1.932765 | -3.671056 | 2.925534  | C | 5.051586  | 0.253052  | 1.758505  |
| H  | -1.185110 | -4.110977 | 3.581162  | H | 5.478259  | 0.923524  | 1.014700  |
| N  | -2.454592 | 0.796975  | 1.929716  | C | -1.805233 | 0.894162  | 3.103397  |
| C  | -1.585113 | -2.599358 | 2.102721  | H | -0.908954 | 0.284755  | 3.206804  |
| N  | -3.673524 | 0.370939  | -0.325448 | C | -2.246501 | 1.717582  | 4.131719  |
| C  | -0.267795 | -2.013401 | 2.021605  | H | -1.693688 | 1.756319  | 5.066512  |

|   |           |           |           |   |           |           |           |
|---|-----------|-----------|-----------|---|-----------|-----------|-----------|
| C | -3.403104 | 2.469039  | 3.943458  | H | 5.755444  | -2.204100 | -3.325078 |
| H | -3.780029 | 3.117714  | 4.730878  | C | 4.358038  | -1.309519 | -1.949625 |
| C | -4.083577 | 2.368087  | 2.733397  | C | 4.780458  | 0.089628  | -2.115573 |
| H | -4.996167 | 2.936293  | 2.571510  | C | 5.785565  | 0.558407  | -2.958310 |
| C | -3.599188 | 1.523222  | 1.739087  | H | 6.351024  | -0.123930 | -3.587326 |
| C | -4.277547 | 1.294790  | 0.461007  | C | 6.062069  | 1.925840  | -2.989655 |
| C | -5.460965 | 1.896816  | 0.039668  | H | 6.841872  | 2.304208  | -3.646290 |
| H | -5.993982 | 2.642617  | 0.624692  | C | 5.351463  | 2.805877  | -2.178735 |
| C | -5.976281 | 1.512312  | -1.189190 | H | 5.577012  | 3.868815  | -2.198179 |
| C | -5.372679 | 0.551152  | -1.983367 | C | 4.355784  | 2.298945  | -1.341975 |
| H | -5.834301 | 0.278054  | -2.929475 | C | 3.545807  | 3.055379  | -0.384463 |
| C | -4.190666 | -0.020755 | -1.515295 | C | 3.692249  | 4.421572  | -0.152057 |
| C | -3.414921 | -1.073725 | -2.166252 | H | 4.407755  | 5.000110  | -0.730985 |
| C | -3.799299 | -1.720920 | -3.336259 | C | 2.932102  | 5.040200  | 0.834341  |
| H | -4.713825 | -1.429595 | -3.846922 | H | 3.044046  | 6.104863  | 1.025245  |
| C | -3.013310 | -2.753058 | -3.837868 | C | 2.041358  | 4.272288  | 1.581012  |
| H | -3.306210 | -3.272426 | -4.747372 | H | 1.442194  | 4.715364  | 2.371620  |
| C | -1.858789 | -3.118690 | -3.149514 | C | 1.929779  | 2.916318  | 1.304759  |
| H | -1.225957 | -3.928459 | -3.501933 | H | 1.255160  | 2.268941  | 1.864212  |
| C | -1.522008 | -2.438490 | -1.986906 | H | -0.824657 | 0.669289  | -3.343334 |
| H | -0.627137 | -2.675629 | -1.416581 | O | -1.610413 | 1.212859  | -3.158803 |
| C | 2.899202  | -2.770935 | -0.846641 | H | -1.643150 | 1.888423  | -3.854305 |
| H | 2.087103  | -2.872008 | -0.128304 | O | -1.22576  | 1.544579  | -0.583769 |
| C | 3.448027  | -3.873499 | -1.489002 | H | -1.42378  | 1.570135  | -1.574812 |
| H | 3.071822  | -4.870122 | -1.274899 | H | -0.26189  | 1.666985  | -0.545708 |
| C | 4.488901  | -3.672736 | -2.390898 | N | -7.2385   | 2.153705  | -1.670653 |
| H | 4.948292  | -4.513276 | -2.906003 | O | -7.6425   | 1.776968  | -2.75801  |
| C | 4.943146  | -2.376905 | -2.623786 | O | -7.72625  | 2.987274  | -0.92593  |

### Min-3 A (4+ quartet)

E= -2901.129 15 a.u.

|    |           |           |           |   |           |           |           |
|----|-----------|-----------|-----------|---|-----------|-----------|-----------|
| Ru | -1.883114 | -0.366815 | 0.264172  | H | 1.089375  | -2.907363 | 3.537465  |
| Ru | 2.651269  | 0.291312  | -0.179919 | N | 3.357575  | -1.455646 | -1.123152 |
| N  | -2.532203 | -2.007480 | 1.329125  | C | 1.811014  | -1.348458 | 2.109322  |
| O  | 0.595670  | -0.416462 | -2.244244 | N | 4.134826  | 1.038997  | -1.265551 |
| O  | 1.338783  | 0.442300  | -1.653260 | C | 3.207090  | -1.065526 | 2.368211  |
| C  | -3.798273 | -2.471499 | 1.341747  | N | 2.598241  | 2.318541  | 0.410130  |
| H  | -4.504048 | -1.962067 | 0.689725  | C | 3.913786  | -1.570284 | 3.459671  |
| N  | -0.085217 | -1.079912 | 1.034184  | H | 3.417463  | -2.236338 | 4.161268  |
| C  | -4.188660 | -3.534891 | 2.139881  | C | 5.242508  | -1.209356 | 3.646384  |
| H  | -5.220162 | -3.875486 | 2.114156  | H | 5.803910  | -1.595812 | 4.493689  |
| N  | 1.203186  | -0.666597 | 1.094653  | C | 5.840536  | -0.341607 | 2.733824  |
| C  | -3.242490 | -4.144298 | 2.965061  | H | 6.874266  | -0.026133 | 2.846047  |
| H  | -3.521932 | -4.977732 | 3.605208  | C | 5.095809  | 0.120284  | 1.658698  |
| N  | 3.807489  | -0.228346 | 1.469025  | H | 5.528448  | 0.788812  | 0.918117  |
| C  | -1.936367 | -3.673884 | 2.954553  | C | -1.793658 | 0.918280  | 3.090393  |
| H  | -1.174850 | -4.133574 | 3.579919  | H | -0.900157 | 0.305074  | 3.195831  |
| N  | -2.444927 | 0.816726  | 1.918082  | C | -2.229586 | 1.751022  | 4.113433  |
| C  | -1.595834 | -2.604912 | 2.124736  | H | -1.675095 | 1.793730  | 5.047094  |
| N  | -3.674481 | 0.363337  | -0.320895 | C | -3.383582 | 2.506017  | 3.922282  |
| C  | -0.271232 | -2.041859 | 2.008165  | H | -3.756122 | 3.161664  | 4.705995  |
| N  | -2.285307 | -1.469048 | -1.476674 | C | -4.068076 | 2.397961  | 2.715176  |
| C  | 0.908138  | -2.231289 | 2.710815  | H | -4.980332 | 2.966449  | 2.552110  |



|   |           |           |           |   |           |          |           |
|---|-----------|-----------|-----------|---|-----------|----------|-----------|
| C | -3.589247 | 1.543504  | 1.726157  | C | 4.828824  | 0.197140 | -2.069619 |
| C | -4.273367 | 1.301431  | 0.453885  | C | 5.850934  | 0.706622 | -2.870805 |
| C | -5.455781 | 1.901789  | 0.027069  | H | 6.424714  | 0.056170 | -3.525528 |
| H | -5.984924 | 2.656956  | 0.603576  | C | 6.130762  | 2.070670 | -2.824062 |
| C | -5.975855 | 1.500595  | -1.194544 | H | 6.924189  | 2.480992 | -3.444082 |
| C | -5.376954 | 0.526543  | -1.976840 | C | 5.402523  | 2.912829 | -1.984486 |
| H | -5.842911 | 0.240664  | -2.917021 | H | 5.628143  | 3.975452 | -1.951377 |
| C | -4.195958 | -0.042866 | -1.503929 | C | 4.388819  | 2.368916 | -1.197164 |
| C | -3.425507 | -1.107693 | -2.143727 | C | 3.538036  | 3.084769 | -0.236765 |
| C | -3.813953 | -1.764802 | -3.307091 | C | 3.668798  | 4.441619 | 0.046834  |
| H | -4.723225 | -1.468641 | -3.824440 | H | 4.416336  | 5.038495 | -0.469580 |
| C | -3.042601 | -2.817204 | -3.790406 | C | 2.847714  | 5.030870 | 1.003783  |
| H | -3.340999 | -3.345684 | -4.692886 | H | 2.949234  | 6.088567 | 1.235181  |
| C | -1.898039 | -3.192721 | -3.091150 | C | 1.908325  | 4.243869 | 1.664286  |
| H | -1.278528 | -4.019465 | -3.427365 | H | 1.258251  | 4.664043 | 2.426559  |
| C | -1.554737 | -2.499602 | -1.938166 | C | 1.817990  | 2.896908 | 1.340000  |
| H | -0.669182 | -2.748140 | -1.358434 | H | 1.107305  | 2.233667 | 1.831068  |
| C | 2.922320  | -2.716719 | -0.976210 | H | -1.369580 | 1.149044 | -3.818156 |
| H | 2.096532  | -2.852827 | -0.279140 | O | -1.982156 | 1.542893 | -3.177955 |
| C | 3.489002  | -3.788641 | -1.654730 | H | -2.260217 | 2.379080 | -3.584583 |
| H | 3.110665  | -4.794402 | -1.493662 | O | -1.12414  | 1.419891 | -0.663738 |
| C | 4.546808  | -3.546273 | -2.525838 | H | -1.44778  | 1.543419 | -1.608963 |
| H | 5.017129  | -4.361585 | -3.070497 | H | -0.15334  | 1.399175 | -0.746019 |
| C | 5.002360  | -2.241347 | -2.688399 | N | -7.2366   | 2.139298 | -1.682123 |
| H | 5.829323  | -2.034689 | -3.362894 | O | -7.63997  | 1.754869 | -2.76729  |
| C | 4.400741  | -1.205268 | -1.978749 | O | -7.72411  | 2.979975 | -0.94517  |

### Min-3 B (4+ doublet)

E= -2901.131 06 a.u.

|    |           |           |           |   |           |           |           |
|----|-----------|-----------|-----------|---|-----------|-----------|-----------|
| Ru | -2.556898 | -0.168812 | -0.123895 | C | 0.424744  | 2.151572  | 1.849329  |
| Ru | 1.961989  | 0.314911  | 0.139666  | N | 3.735057  | -0.423232 | -0.416206 |
| N  | -3.664824 | 0.397603  | 1.522401  | C | 1.757244  | 2.719691  | 1.883613  |
| O  | 0.157299  | -1.775192 | 0.016326  | N | 2.231742  | 1.234791  | -1.728476 |
| O  | 1.041752  | -1.157116 | -0.725257 | C | 2.114361  | 3.827073  | 2.653052  |
| C  | -4.952067 | 0.056310  | 1.731926  | H | 1.377917  | 4.300006  | 3.298316  |
| H  | -5.391788 | -0.628831 | 1.010868  | C | 3.410354  | 4.323249  | 2.576658  |
| N  | -1.109708 | 0.782675  | 1.062902  | H | 3.704251  | 5.186385  | 3.169361  |
| C  | -5.683667 | 0.550085  | 2.800651  | C | 4.323869  | 3.703931  | 1.723827  |
| H  | -6.718106 | 0.243901  | 2.930336  | H | 5.344167  | 4.065723  | 1.629637  |
| N  | 0.177328  | 1.169398  | 0.928309  | C | 3.911537  | 2.601661  | 0.989258  |
| C  | -5.072248 | 1.437364  | 3.686921  | H | 4.594181  | 2.083218  | 0.318480  |
| H  | -5.624365 | 1.845675  | 4.530094  | C | -2.861599 | 2.834742  | -0.881021 |
| N  | 2.662332  | 2.105423  | 1.065662  | H | -2.123566 | 2.973543  | -0.092696 |
| C  | -3.745002 | 1.789360  | 3.479634  | C | -3.352956 | 3.907572  | -1.612943 |
| H  | -3.237955 | 2.471152  | 4.158162  | H | -3.002952 | 4.913649  | -1.398123 |
| N  | -3.267150 | 1.570188  | -1.095250 | C | -4.301212 | 3.666883  | -2.603640 |
| C  | -3.052755 | 1.253950  | 2.393208  | H | -4.712303 | 4.484975  | -3.190627 |
| N  | -4.057962 | -0.898250 | -1.266040 | C | -4.730604 | 2.361883  | -2.824543 |
| C  | -1.664801 | 1.513497  | 2.089707  | H | -5.480575 | 2.156898  | -3.584176 |
| N  | -2.771249 | -2.133302 | 0.581925  | C | -4.209337 | 1.323510  | -2.057641 |
| C  | -0.722957 | 2.393729  | 2.607187  | C | -4.647130 | -0.071326 | -2.162109 |
| H  | -0.848882 | 3.104575  | 3.414729  | C | -5.610491 | -0.572903 | -3.035872 |
| N  | 2.533813  | -0.752609 | 1.883599  | H | -6.098787 | 0.075400  | -3.758502 |

|   |           |           |           |   |           |           |           |
|---|-----------|-----------|-----------|---|-----------|-----------|-----------|
| C | -5.951610 | -1.922525 | -2.967264 | C | 5.607674  | -1.804720 | 0.059581  |
| H | -6.700622 | -2.327162 | -3.643776 | H | 6.191590  | -2.462323 | 0.699262  |
| C | -5.348471 | -2.748417 | -2.023011 | C | 6.078771  | -1.515228 | -1.214054 |
| H | -5.627466 | -3.796552 | -1.954108 | C | 5.406181  | -0.679143 | -2.089850 |
| C | -4.389174 | -2.207531 | -1.166808 | H | 5.836303  | -0.483809 | -3.069454 |
| C | -3.684999 | -2.900263 | -0.089668 | C | 4.201822  | -0.125555 | -1.654681 |
| C | -3.926584 | -4.217502 | 0.289125  | C | 3.361834  | 0.821221  | -2.389936 |
| H | -4.656364 | -4.815652 | -0.250668 | C | 3.686673  | 1.336394  | -3.642999 |
| C | -3.241190 | -4.757598 | 1.371867  | H | 4.584975  | 1.000742  | -4.155458 |
| H | -3.427378 | -5.783348 | 1.681573  | C | 2.865649  | 2.295029  | -4.227574 |
| C | -2.328870 | -3.960890 | 2.060453  | H | 3.113780  | 2.707239  | -5.202799 |
| H | -1.784799 | -4.342179 | 2.920072  | C | 1.735519  | 2.727357  | -3.537392 |
| C | -2.125007 | -2.654132 | 1.640374  | H | 1.078897  | 3.486561  | -3.953221 |
| H | -1.418577 | -1.991087 | 2.134191  | C | 1.455180  | 2.176115  | -2.293948 |
| C | 1.864041  | -0.855169 | 3.042966  | H | 0.589110  | 2.484430  | -1.709543 |
| H | 0.922198  | -0.311261 | 3.095061  | O | -1.449012 | -0.515071 | -1.951791 |
| C | 2.338709  | -1.600320 | 4.115609  | H | -1.440622 | -1.502148 | -2.166694 |
| H | 1.768643  | -1.645183 | 5.039604  | H | -0.504739 | -0.297907 | -1.870141 |
| C | 3.553874  | -2.265978 | 3.984363  | H | -0.65059  | -3.312012 | -1.465056 |
| H | 3.959738  | -2.850746 | 4.806693  | O | -1.35546  | -3.137098 | -2.111035 |
| C | 4.252441  | -2.169706 | 2.782866  | H | -1.15196  | -3.682502 | -2.887007 |
| H | 5.203197  | -2.683139 | 2.663294  | N | 7.369631  | -2.127201 | -1.656134 |
| C | 3.729516  | -1.407412 | 1.743272  | O | 7.738019  | -1.83252  | -2.78088  |
| C | 4.398833  | -1.232968 | 0.446365  | O | 7.914884  | -2.85705  | -0.84507  |

### Min-3 B (4+ quartet)

E= -2901.13082 a.u.

|    |           |           |           |   |           |           |           |
|----|-----------|-----------|-----------|---|-----------|-----------|-----------|
| Ru | -2.561088 | 0.126155  | -0.149500 | C | 1.806400  | -2.797840 | 1.721679  |
| Ru | 1.995986  | -0.282602 | 0.181197  | N | 2.126211  | 1.072281  | 1.795052  |
| N  | -3.664218 | -1.614191 | -0.184916 | C | 2.176055  | -3.921374 | 2.461675  |
| O  | 0.520936  | 0.381890  | -1.741307 | H | 1.431376  | -4.674677 | 2.707417  |
| O  | 1.111910  | 1.195731  | -0.903239 | C | 3.490991  | -4.060477 | 2.888266  |
| C  | -4.954958 | -1.701058 | -0.566107 | H | 3.792559  | -4.929488 | 3.468151  |
| H  | -5.406041 | -0.789677 | -0.951416 | C | 4.413697  | -3.066562 | 2.565639  |
| N  | -1.101267 | -1.298706 | 0.329114  | H | 5.450955  | -3.133010 | 2.882447  |
| C  | -5.675363 | -2.881237 | -0.475455 | C | 3.991268  | -1.976302 | 1.818695  |
| H  | -6.711968 | -2.903861 | -0.800284 | H | 4.681724  | -1.183931 | 1.537164  |
| N  | 0.204425  | -1.326268 | 0.690356  | C | -2.977998 | -0.196820 | 2.906313  |
| C  | -5.049318 | -4.018473 | 0.036219  | H | -2.190471 | -0.940434 | 2.795767  |
| H  | -5.591996 | -4.956661 | 0.123963  | C | -3.550887 | 0.078634  | 4.141095  |
| N  | 2.720321  | -1.835954 | 1.397109  | H | -3.214271 | -0.457634 | 5.024281  |
| C  | -3.719850 | -3.936778 | 0.427368  | C | -4.560670 | 1.034401  | 4.215863  |
| H  | -3.201650 | -4.808024 | 0.820640  | H | -5.035680 | 1.268254  | 5.165860  |
| N  | -3.360173 | 0.429837  | 1.779605  | C | -4.967681 | 1.678788  | 3.051747  |
| C  | -3.038803 | -2.725109 | 0.304767  | H | -5.765578 | 2.416241  | 3.087835  |
| N  | -4.073549 | 1.419363  | -0.503515 | C | -4.362522 | 1.361114  | 1.838392  |
| C  | -1.649386 | -2.524591 | 0.642489  | C | -4.761185 | 1.926858  | 0.546911  |
| N  | -2.659536 | 0.146913  | -2.240898 | C | -5.773825 | 2.860332  | 0.326596  |
| C  | -0.693970 | -3.331398 | 1.242690  | H | -6.344775 | 3.268414  | 1.156541  |
| H  | -0.810954 | -4.344592 | 1.607366  | C | -6.062656 | 3.250530  | -0.978896 |
| N  | 2.731202  | -1.421852 | -1.444158 | H | -6.855017 | 3.971107  | -1.167056 |
| C  | 0.459133  | -2.542480 | 1.256400  | C | -5.354186 | 2.702155  | -2.044778 |
| N  | 3.758071  | 0.594786  | -0.186899 | H | -5.596858 | 2.985383  | -3.065752 |

|   |           |           |           |   |           |          |           |
|---|-----------|-----------|-----------|---|-----------|----------|-----------|
| C | -4.347862 | 1.773209  | -1.781912 | C | 6.074127  | 1.884005 | -0.750543 |
| C | -3.546993 | 1.048046  | -2.769860 | C | 5.327592  | 2.301564 | 0.341888  |
| C | -3.689929 | 1.179651  | -4.148163 | H | 5.690611  | 3.133283 | 0.940825  |
| H | -4.396992 | 1.896402  | -4.558403 | C | 4.142201  | 1.622382 | 0.612227  |
| C | -2.938513 | 0.373725  | -4.998421 | C | 3.234925  | 1.877023 | 1.737681  |
| H | -3.049219 | 0.463094  | -6.076578 | C | 3.476975  | 2.829652 | 2.723779  |
| C | -2.062659 | -0.558238 | -4.448029 | H | 4.361859  | 3.459086 | 2.671561  |
| H | -1.473280 | -1.218140 | -5.078324 | C | 2.588338  | 2.961139 | 3.787173  |
| C | -1.953155 | -0.644965 | -3.066908 | H | 2.775419  | 3.694877 | 4.567740  |
| H | -1.280777 | -1.350065 | -2.583565 | C | 1.471348  | 2.132241 | 3.840661  |
| C | 2.154231  | -2.500162 | -1.997482 | H | 0.763554  | 2.194537 | 4.662545  |
| H | 1.203744  | -2.805262 | -1.561146 | C | 1.277012  | 1.202486 | 2.827183  |
| C | 2.724769  | -3.186570 | -3.062338 | H | 0.424622  | 0.525886 | 2.819574  |
| H | 2.224933  | -4.059506 | -3.473475 | O | -1.374717 | 1.893933 | 0.129661  |
| C | 3.937293  | -2.738347 | -3.580216 | H | -1.761236 | 2.776695 | -0.149026 |
| H | 4.411335  | -3.253871 | -4.412139 | H | -0.465911 | 1.864087 | -0.230477 |
| C | 4.540884  | -1.620757 | -3.012847 | H | -2.13843  | 4.699845 | -1.397853 |
| H | 5.490423  | -1.257590 | -3.398163 | O | -2.45093  | 4.242187 | -0.602467 |
| C | 3.926160  | -0.978304 | -1.940876 | H | -2.50858  | 4.941928 | 0.066150  |
| C | 4.496771  | 0.175416  | -1.243037 | N | 7.345042  | 2.603294 | -1.067024 |
| C | 5.691854  | 0.822582  | -1.554299 | O | 7.6271    | 3.532165 | -0.32785  |
| H | 6.327344  | 0.535017  | -2.388632 | O | 7.964459  | 2.186699 | -2.0316   |

### TS-3 A (3+ unrestricted singlet)

E= -2977.993 72 a.u.

|    |           |           |           |   |           |           |           |
|----|-----------|-----------|-----------|---|-----------|-----------|-----------|
| Ru | -2.070572 | -0.165511 | 0.258466  | C | 3.837597  | -1.791090 | 3.422863  |
| Ru | 2.599240  | -0.051599 | -0.250940 | H | 3.300169  | -2.152729 | 4.295951  |
| N  | -2.761338 | -0.531294 | 2.156860  | C | 5.219643  | -1.852878 | 3.361618  |
| O  | 0.436968  | -2.120072 | -1.513659 | H | 5.789196  | -2.262237 | 4.192228  |
| O  | 0.981186  | -1.002614 | -1.772966 | C | 5.868962  | -1.387185 | 2.215865  |
| C  | -4.054350 | -0.438387 | 2.533801  | H | 6.950625  | -1.420224 | 2.123126  |
| H  | -4.751138 | -0.102521 | 1.770124  | C | 5.111079  | -0.874507 | 1.179643  |
| N  | -0.212010 | -0.585311 | 1.320246  | H | 5.571573  | -0.501968 | 0.268367  |
| C  | -4.487106 | -0.748147 | 3.812124  | C | -1.393626 | 2.758137  | 1.064663  |
| H  | -5.540712 | -0.653653 | 4.058980  | H | -0.486577 | 2.305797  | 1.461813  |
| N  | 1.122590  | -0.696944 | 1.135453  | C | -1.641380 | 4.120475  | 1.165882  |
| C  | -3.554332 | -1.178919 | 4.754363  | H | -0.918117 | 4.766244  | 1.658410  |
| H  | -3.862138 | -1.434982 | 5.764920  | C | -2.828033 | 4.629404  | 0.641442  |
| N  | 3.763038  | -0.805504 | 1.236818  | H | -3.063811 | 5.688169  | 0.715398  |
| C  | -2.222806 | -1.271784 | 4.378915  | C | -3.718320 | 3.754232  | 0.030166  |
| H  | -1.467333 | -1.599282 | 5.088897  | H | -4.654261 | 4.124710  | -0.380795 |
| N  | -2.245811 | 1.899318  | 0.479258  | C | -3.415035 | 2.396000  | -0.043244 |
| C  | -1.842757 | -0.940319 | 3.077141  | C | -4.297681 | 1.397381  | -0.648820 |
| N  | -3.826323 | 0.124733  | -0.542102 | C | -5.515461 | 1.638931  | -1.275916 |
| C  | -0.477307 | -0.979818 | 2.607638  | H | -5.939631 | 2.632919  | -1.388747 |
| N  | -2.581966 | -2.131753 | -0.255557 | C | -6.207447 | 0.549280  | -1.785500 |
| C  | 0.695219  | -1.349415 | 3.258554  | C | -5.723142 | -0.747848 | -1.690948 |
| H  | 0.811368  | -1.699522 | 4.276635  | H | -6.302218 | -1.561243 | -2.119689 |
| N  | 3.374213  | -1.736632 | -1.323591 | C | -4.501033 | -0.941466 | -1.054153 |
| C  | 1.682473  | -1.151992 | 2.302155  | C | -3.815096 | -2.220467 | -0.851675 |
| N  | 4.047842  | 0.739842  | -1.374266 | C | -4.357046 | -3.452118 | -1.210356 |
| C  | 3.114548  | -1.265645 | 2.347711  | H | -5.334531 | -3.500749 | -1.683814 |
| N  | 2.780159  | 1.839414  | 0.627771  | C | -3.647497 | -4.618332 | -0.946603 |

|   |           |           |           |   |           |           |           |
|---|-----------|-----------|-----------|---|-----------|-----------|-----------|
| H | -4.063176 | -5.585803 | -1.216520 | C | 3.695099  | 2.642371  | -0.006015 |
| C | -2.405823 | -4.522876 | -0.325662 | C | 3.994754  | 3.909676  | 0.490796  |
| H | -1.823477 | -5.409910 | -0.092406 | H | 4.734920  | 4.528587  | -0.010837 |
| C | -1.910177 | -3.267119 | 0.000694  | C | 3.373455  | 4.366485  | 1.646965  |
| H | -0.939517 | -3.136353 | 0.474589  | H | 3.613608  | 5.348439  | 2.047151  |
| C | 3.059516  | -3.022160 | -1.116457 | C | 2.466019  | 3.533273  | 2.296675  |
| H | 2.334819  | -3.210077 | -0.328382 | H | 1.980325  | 3.836866  | 3.220583  |
| C | 3.604092  | -4.050390 | -1.878014 | C | 2.203799  | 2.280876  | 1.760197  |
| H | 3.323694  | -5.079737 | -1.672897 | H | 1.520173  | 1.582355  | 2.240213  |
| C | 4.502312  | -3.734721 | -2.892211 | O | -1.357755 | 0.260511  | -1.763686 |
| H | 4.938827  | -4.515025 | -3.510592 | H | -1.202062 | -0.583658 | -2.221234 |
| C | 4.851968  | -2.403789 | -3.093783 | H | -0.455976 | 0.659058  | -1.715341 |
| H | 5.570442  | -2.135914 | -3.864525 | H | 1.425049  | 1.345669  | -2.658514 |
| C | 4.287520  | -1.417755 | -2.287692 | O | 1.188565  | 1.456137  | -1.723552 |
| C | 4.662209  | -0.004088 | -2.329403 | H | 1.187898  | 2.437566  | -1.557706 |
| C | 5.598523  | 0.588799  | -3.177194 | H | 1.535442  | 4.773673  | -1.750559 |
| H | 6.088968  | 0.006993  | -3.953204 | O | 1.022289  | 4.135942  | -1.23301  |
| C | 5.906553  | 1.935394  | -3.009033 | H | 0.111113  | 4.455577  | -1.30097  |
| H | 6.634849  | 2.411390  | -3.660487 | O | -8.07302  | -0.20895  | -2.90097  |
| C | 5.301975  | 2.668237  | -1.988908 | O | -7.88257  | 1.943362  | -2.52663  |
| H | 5.569574  | 3.710643  | -1.836568 | N | -7.50353  | 0.781597  | -2.46479  |
| C | 4.366018  | 2.045424  | -1.165215 |   |           |           |           |

### TS-3 A (3+ triplet)

E= -2978.006 06 a.u.

|    |           |           |           |   |           |           |           |
|----|-----------|-----------|-----------|---|-----------|-----------|-----------|
| Ru | -2.060798 | -0.173606 | 0.292343  | C | 3.880546  | -1.410236 | 3.565443  |
| Ru | 2.609214  | -0.045706 | -0.243939 | H | 3.349798  | -1.731170 | 4.458322  |
| N  | -2.758596 | -0.601828 | 2.174283  | C | 5.264803  | -1.406601 | 3.523566  |
| O  | 0.495660  | -2.113999 | -1.667214 | H | 5.842179  | -1.723392 | 4.388502  |
| O  | 0.998184  | -0.974919 | -1.824475 | C | 5.905636  | -0.994317 | 2.353305  |
| C  | -4.062331 | -0.596663 | 2.525551  | H | 6.988778  | -0.977538 | 2.274398  |
| H  | -4.766302 | -0.326196 | 1.742812  | C | 5.137618  | -0.599969 | 1.273395  |
| N  | -0.202047 | -0.549125 | 1.365879  | H | 5.591864  | -0.272422 | 0.342147  |
| C  | -4.496447 | -0.912654 | 3.801609  | C | -1.501350 | 2.730844  | 1.246000  |
| H  | -5.558820 | -0.891341 | 4.027053  | H | -0.602189 | 2.285088  | 1.666449  |
| N  | 1.137750  | -0.597530 | 1.194600  | C | -1.791666 | 4.080740  | 1.391466  |
| C  | -3.552938 | -1.253375 | 4.769924  | H | -1.110206 | 4.724885  | 1.941616  |
| H  | -3.860778 | -1.508908 | 5.780622  | C | -2.969495 | 4.578900  | 0.837988  |
| N  | 3.786898  | -0.596328 | 1.310677  | H | -3.236820 | 5.627493  | 0.943100  |
| C  | -2.211585 | -1.259081 | 4.419952  | C | -3.813037 | 3.704803  | 0.161914  |
| H  | -1.448329 | -1.518273 | 5.149525  | H | -4.745252 | 4.065472  | -0.265977 |
| N  | -2.303056 | 1.875384  | 0.588756  | C | -3.469643 | 2.358930  | 0.048690  |
| C  | -1.830694 | -0.929556 | 3.117670  | C | -4.310495 | 1.358262  | -0.611056 |
| N  | -3.812016 | 0.094348  | -0.527566 | C | -5.518131 | 1.588895  | -1.261725 |
| C  | -0.459122 | -0.899634 | 2.667950  | H | -5.963054 | 2.575583  | -1.357799 |
| N  | -2.514755 | -2.136687 | -0.283978 | C | -6.171862 | 0.498232  | -1.817679 |
| C  | 0.725481  | -1.169399 | 3.344184  | C | -5.659264 | -0.789633 | -1.747213 |
| H  | 0.850931  | -1.463291 | 4.378818  | H | -6.208099 | -1.603802 | -2.212749 |
| N  | 3.322321  | -1.847485 | -1.120721 | C | -4.448431 | -0.972151 | -1.086176 |
| C  | 1.709959  | -0.962936 | 2.385800  | C | -3.736123 | -2.239601 | -0.902606 |
| N  | 4.036028  | 0.604765  | -1.461063 | C | -4.245631 | -3.474782 | -1.295698 |
| C  | 3.146191  | -1.003489 | 2.447511  | H | -5.214566 | -3.533774 | -1.785347 |
| N  | 2.782898  | 1.940635  | 0.398963  | C | -3.516680 | -4.631285 | -1.043321 |

|   |           |           |           |   |           |           |           |
|---|-----------|-----------|-----------|---|-----------|-----------|-----------|
| H | -3.907682 | -5.601498 | -1.338977 | C | 4.002183  | 3.974449  | 0.006297  |
| C | -2.288439 | -4.522828 | -0.397749 | H | 4.735545  | 4.528434  | -0.575017 |
| H | -1.693241 | -5.402636 | -0.169529 | C | 3.406899  | 4.560725  | 1.117942  |
| C | -1.825344 | -3.264129 | -0.037761 | H | 3.660111  | 5.579304  | 1.401857  |
| H | -0.867928 | -3.123973 | 0.460301  | C | 2.511212  | 3.811272  | 1.874853  |
| C | 2.984484  | -3.098744 | -0.780319 | H | 2.048967  | 4.218545  | 2.770426  |
| H | 2.245158  | -3.187094 | 0.013021  | C | 2.230890  | 2.509348  | 1.483123  |
| C | 3.531893  | -4.215048 | -1.403047 | H | 1.555700  | 1.869567  | 2.049848  |
| H | 3.234553  | -5.210835 | -1.086354 | O | -1.356306 | 0.354682  | -1.714189 |
| C | 4.455827  | -4.028111 | -2.425601 | H | -1.252245 | -0.441940 | -2.259191 |
| H | 4.897098  | -4.878916 | -2.938623 | H | -0.454501 | 0.765973  | -1.713424 |
| C | 4.822208  | -2.732408 | -2.774895 | H | 1.329114  | 1.461796  | -2.815360 |
| H | 5.556922  | -2.563298 | -3.558215 | O | 1.124133  | 1.541799  | -1.870601 |
| C | 4.254446  | -1.652845 | -2.102603 | H | 1.064297  | 2.516564  | -1.688198 |
| C | 4.637675  | -0.255552 | -2.321488 | H | 1.237231  | 4.883004  | -1.768127 |
| C | 5.563399  | 0.225349  | -3.247743 | O | 0.786338  | 4.189342  | -1.264926 |
| H | 6.045468  | -0.448357 | -3.951265 | H | -0.14497  | 4.451801  | -1.28351  |
| C | 5.869204  | 1.583326  | -3.255359 | H | 6.588157  | 1.973079  | -3.97132  |
| C | 5.272840  | 2.441200  | -2.332364 | O | -7.99238  | -0.27186  | -2.99754  |
| H | 5.535557  | 3.495849  | -2.321923 | O | -7.85949  | 1.873874  | -2.56486  |
| C | 4.349365  | 1.926757  | -1.424182 | N | -7.45609  | 0.719487  | -2.52263  |
| C | 3.689751  | 2.660514  | -0.336814 |   |           |           |           |

### TS-3 B (3+ unrestricted singlet)

E= -2977.991 62 a.u.

|    |           |           |           |   |           |           |           |
|----|-----------|-----------|-----------|---|-----------|-----------|-----------|
| Ru | -2.706676 | 0.134516  | -0.270774 | C | 2.099970  | -2.674375 | 3.804139  |
| Ru | 1.921207  | -0.419967 | 0.205555  | H | 1.343972  | -3.036450 | 4.496418  |
| N  | -3.842119 | -0.311787 | 1.377056  | C | 3.443191  | -2.933959 | 4.017214  |
| O  | -0.155080 | -2.036150 | -1.669704 | H | 3.762049  | -3.503159 | 4.886839  |
| O  | 0.547805  | -0.982377 | -1.687895 | C | 4.380698  | -2.458765 | 3.096648  |
| C  | -5.164673 | -0.062471 | 1.484910  | H | 5.443857  | -2.641859 | 3.222544  |
| H  | -5.622232 | 0.452309  | 0.643917  | C | 3.937457  | -1.739911 | 2.002554  |
| N  | -1.203259 | -0.673810 | 1.086356  | H | 4.628978  | -1.351653 | 1.259340  |
| C  | -5.910230 | -0.433637 | 2.591233  | C | -1.860947 | 2.812819  | 1.052524  |
| H  | -6.971937 | -0.206106 | 2.622749  | H | -1.140942 | 2.181660  | 1.570981  |
| N  | 0.113481  | -0.967377 | 1.170365  | C | -1.944396 | 4.178984  | 1.286949  |
| C  | -5.276826 | -1.096770 | 3.641207  | H | -1.287833 | 4.644614  | 2.019018  |
| H  | -5.834784 | -1.406305 | 4.521192  | C | -2.895310 | 4.923400  | 0.589482  |
| N  | 2.628555  | -1.478275 | 1.792970  | H | -3.000618 | 5.992662  | 0.755765  |
| C  | -3.917497 | -1.352086 | 3.543273  | C | -3.724610 | 4.268854  | -0.313388 |
| H  | -3.389384 | -1.862993 | 4.344688  | H | -4.481236 | 4.825529  | -0.860595 |
| N  | -2.655991 | 2.166279  | 0.181852  | C | -3.599052 | 2.893607  | -0.504909 |
| C  | -3.215144 | -0.949550 | 2.406083  | C | -4.451769 | 2.115602  | -1.406702 |
| N  | -4.193162 | 0.782767  | -1.372411 | C | -5.461670 | 2.606179  | -2.232452 |
| C  | -1.795546 | -1.149129 | 2.229630  | H | -5.682647 | 3.669746  | -2.268903 |
| N  | -3.358084 | -1.661334 | -1.135802 | C | -6.184988 | 1.714863  | -3.020931 |
| C  | -0.853802 | -1.753992 | 3.056352  | C | -5.892181 | 0.353866  | -2.983115 |
| H  | -1.013073 | -2.216687 | 4.022335  | H | -6.447415 | -0.340794 | -3.607969 |
| N  | 2.702553  | -2.090501 | -0.892336 | C | -4.875998 | -0.101904 | -2.144341 |
| C  | 0.338897  | -1.614506 | 2.359093  | C | -4.431729 | -1.489348 | -1.974256 |
| N  | 3.655181  | 0.258487  | -0.499485 | C | -5.045503 | -2.578166 | -2.588699 |
| C  | 1.699747  | -1.943954 | 2.680785  | H | -5.893278 | -2.422846 | -3.251234 |
| N  | 2.131724  | 1.329370  | 1.334418  | C | -4.579804 | -3.864231 | -2.339532 |

|   |           |           |           |   |           |           |           |
|---|-----------|-----------|-----------|---|-----------|-----------|-----------|
| H | -5.056274 | -4.720680 | -2.809748 | C | 3.591243  | 3.208474  | 1.695550  |
| C | -3.503944 | -4.032451 | -1.473377 | H | 4.485459  | 3.763366  | 1.422148  |
| H | -3.115508 | -5.020420 | -1.242360 | C | 2.808793  | 3.628504  | 2.763910  |
| C | -2.923819 | -2.910571 | -0.896209 | H | 3.079198  | 4.519438  | 3.325228  |
| H | -2.072573 | -2.985572 | -0.222846 | C | 1.694299  | 2.871551  | 3.118597  |
| C | 2.204437  | -3.333846 | -0.910620 | H | 1.072071  | 3.144784  | 3.967150  |
| H | 1.309944  | -3.494150 | -0.314227 | C | 1.394468  | 1.731841  | 2.385712  |
| C | 2.779040  | -4.351219 | -1.665267 | H | 0.547620  | 1.094467  | 2.635365  |
| H | 2.344034  | -5.346561 | -1.646707 | O | -1.531903 | 0.654201  | -2.046372 |
| C | 3.905925  | -4.069983 | -2.431146 | H | -1.415759 | -0.142150 | -2.591274 |
| H | 4.372814  | -4.842062 | -3.037575 | H | -0.611495 | 0.880888  | -1.772712 |
| C | 4.442406  | -2.787321 | -2.395771 | H | 1.499847  | 1.389014  | -2.203979 |
| H | 5.336901  | -2.549021 | -2.966184 | O | 1.07233   | 1.412910  | -1.332929 |
| C | 3.833291  | -1.814255 | -1.606643 | H | 1.115335  | 2.362927  | -1.035211 |
| C | 4.368161  | -0.469831 | -1.400394 | H | 1.529296  | 4.682178  | -1.015170 |
| C | 5.519344  | 0.063974  | -1.975620 | O | 1.067324  | 4.002967  | -0.501364 |
| H | 6.116837  | -0.469946 | -2.709917 | H | 0.173159  | 4.355561  | -0.38324  |
| C | 5.907446  | 1.334628  | -1.578848 | H | -6.97464  | 2.082098  | -3.67083  |
| C | 5.211395  | 2.059576  | -0.621083 | N | 7.120093  | 1.937793  | -2.18763  |
| H | 5.582690  | 3.038314  | -0.329384 | O | 7.403435  | 3.068613  | -1.81748  |
| C | 4.066821  | 1.486439  | -0.075901 | O | 7.715097  | 1.24869   | -3.00251  |
| C | 3.246300  | 2.054335  | 0.995456  |   |           |           |           |

### TS-3 B (3+ triplet)

E= -2978.003 80 a.u.

|    |           |           |           |   |           |           |           |
|----|-----------|-----------|-----------|---|-----------|-----------|-----------|
| Ru | -2.675123 | 0.048266  | -0.254004 | C | 2.174783  | -1.966159 | 4.187228  |
| Ru | 1.957424  | -0.306583 | 0.287324  | H | 1.424856  | -2.311913 | 4.894306  |
| N  | -3.854097 | -0.588533 | 1.291070  | C | 3.524203  | -2.043182 | 4.487407  |
| O  | 0.111266  | -2.129435 | -1.760291 | H | 3.853633  | -2.451245 | 5.439651  |
| O  | 0.630388  | -0.998268 | -1.664636 | C | 4.453513  | -1.590840 | 3.548054  |
| C  | -5.203116 | -0.535267 | 1.290750  | H | 5.521773  | -1.630737 | 3.740185  |
| H  | -5.662317 | -0.121942 | 0.396253  | C | 3.996291  | -1.081838 | 2.346919  |
| N  | -1.189434 | -0.662219 | 1.151767  | H | 4.682777  | -0.720122 | 1.586436  |
| C  | -5.970107 | -0.974584 | 2.356484  | C | -2.362365 | 2.636485  | 1.438613  |
| H  | -7.052910 | -0.907888 | 2.301205  | H | -1.677579 | 2.021778  | 2.019483  |
| N  | 0.146191  | -0.791078 | 1.306101  | C | -2.651355 | 3.946500  | 1.793182  |
| C  | -5.329398 | -1.494547 | 3.480492  | H | -2.192595 | 4.383857  | 2.676014  |
| H  | -5.902830 | -1.848455 | 4.333403  | C | -3.546048 | 4.672024  | 1.011191  |
| N  | 2.680288  | -1.001138 | 2.049685  | H | -3.799035 | 5.699769  | 1.259317  |
| C  | -3.944169 | -1.553124 | 3.490664  | C | -4.139960 | 4.046340  | -0.078881 |
| H  | -3.411144 | -1.954387 | 4.349223  | H | -4.871062 | 4.579025  | -0.682200 |
| N  | -2.907130 | 2.025820  | 0.372503  | C | -3.826176 | 2.721066  | -0.376330 |
| C  | -3.220948 | -1.096284 | 2.387416  | C | -4.481574 | 1.949656  | -1.436504 |
| N  | -4.119253 | 0.640752  | -1.449268 | C | -5.423908 | 2.416911  | -2.351497 |
| C  | -1.779673 | -1.117554 | 2.304556  | H | -5.727044 | 3.460758  | -2.352673 |
| N  | -3.106792 | -1.737752 | -1.263680 | C | -5.974650 | 1.528884  | -3.272291 |
| C  | -0.814349 | -1.528347 | 3.217184  | C | -5.579479 | 0.193253  | -3.276982 |
| H  | -0.964255 | -1.924587 | 4.213755  | H | -5.999104 | -0.497980 | -4.003244 |
| N  | 2.699693  | -2.137188 | -0.493572 | C | -4.634472 | -0.239374 | -2.347557 |
| C  | 0.386826  | -1.301150 | 2.555852  | C | -4.106089 | -1.599421 | -2.196453 |
| N  | 3.677453  | 0.248905  | -0.511436 | C | -4.590028 | -2.698896 | -2.901889 |
| C  | 1.759042  | -1.441353 | 2.959555  | H | -5.380290 | -2.568419 | -3.637023 |
| N  | 2.092228  | 1.644727  | 1.020344  | C | -4.077399 | -3.965058 | -2.643928 |

|   |           |           |           |   |           |          |           |
|---|-----------|-----------|-----------|---|-----------|----------|-----------|
| H | -4.454909 | -4.830326 | -3.182825 | C | 3.483419  | 3.605810 | 0.982021  |
| C | -3.089676 | -4.103415 | -1.673294 | H | 4.366894  | 4.119612 | 0.610538  |
| H | -2.676255 | -5.077053 | -1.425238 | C | 2.655583  | 4.223513 | 1.914847  |
| C | -2.634394 | -2.971243 | -1.011470 | H | 2.883418  | 5.225977 | 2.269058  |
| H | -1.858916 | -3.024193 | -0.250052 | C | 1.555068  | 3.526212 | 2.404213  |
| C | 2.182762  | -3.362380 | -0.325532 | H | 0.899359  | 3.961158 | 3.153974  |
| H | 1.259942  | -3.409429 | 0.248856  | C | 1.311062  | 2.242964 | 1.932557  |
| C | 2.776937  | -4.503343 | -0.854699 | H | 0.472295  | 1.645439 | 2.284517  |
| H | 2.325159  | -5.476364 | -0.682999 | O | -1.443252 | 0.815857 | -1.920968 |
| C | 3.946100  | -4.370968 | -1.595799 | H | -1.478590 | 0.185747 | -2.658900 |
| H | 4.432175  | -5.241629 | -2.028738 | H | -0.474872 | 0.914415 | -1.737597 |
| C | 4.497519  | -3.104689 | -1.764194 | H | 1.564313  | 1.478139 | -2.541828 |
| H | 5.420767  | -2.978565 | -2.324411 | O | 1.198723  | 1.476959 | -1.644145 |
| C | 3.866761  | -2.001529 | -1.195028 | H | 0.979775  | 2.418823 | -1.424296 |
| C | 4.405500  | -0.640148 | -1.237094 | H | 0.414755  | 4.713405 | -0.949902 |
| C | 5.563819  | -0.221815 | -1.888564 | O | 0.049852  | 3.816396 | -0.937883 |
| H | 6.178019  | -0.884836 | -2.492150 | H | -0.75615  | 3.877575 | -1.47161  |
| C | 5.935687  | 1.106963  | -1.749304 | H | -6.71031  | 1.879437 | -3.99122  |
| C | 5.212471  | 2.007916  | -0.978938 | O | 7.440023  | 2.764945 | -2.29043  |
| H | 5.567642  | 3.031433  | -0.893294 | O | 7.767468  | 0.752722 | -3.10001  |
| C | 4.061070  | 1.544867  | -0.349941 | N | 7.159917  | 1.584304 | -2.44235  |
| C | 3.196276  | 2.312152  | 0.553094  |   |           |          |           |

### TS-3 A (4+ doublet)

E= -2977.537 41 a.u.

|    |           |           |           |   |           |           |           |
|----|-----------|-----------|-----------|---|-----------|-----------|-----------|
| Ru | -1.993274 | -0.476133 | 0.094680  | C | 3.688140  | -2.514358 | 3.018035  |
| Ru | 2.529782  | 0.146992  | -0.089465 | H | 3.175615  | -3.313453 | 3.548245  |
| N  | -2.747264 | -2.230310 | 0.837921  | C | 5.018686  | -2.226676 | 3.283784  |
| O  | 0.892687  | -1.433967 | -2.452623 | H | 5.570472  | -2.798991 | 4.025388  |
| O  | 0.937605  | -0.345400 | -1.843851 | C | 5.632000  | -1.187566 | 2.584153  |
| C  | -4.038180 | -2.612560 | 0.755639  | H | 6.669134  | -0.918037 | 2.764546  |
| H  | -4.701825 | -1.949398 | 0.205710  | C | 4.902885  | -0.484600 | 1.637895  |
| N  | -0.257315 | -1.413295 | 0.725707  | H | 5.350399  | 0.326254  | 1.070605  |
| C  | -4.501683 | -3.782605 | 1.335429  | C | -1.869779 | 0.244629  | 3.120168  |
| H  | -5.550226 | -4.050486 | 1.238449  | H | -0.996007 | -0.405273 | 3.102925  |
| N  | 1.044067  | -1.087913 | 0.856440  | C | -2.299698 | 0.853349  | 4.293096  |
| C  | -3.606093 | -4.593491 | 2.034365  | H | -1.759234 | 0.680222  | 5.220074  |
| H  | -3.943463 | -5.515675 | 2.501373  | C | -3.433253 | 1.660847  | 4.257047  |
| N  | 3.607128  | -0.758342 | 1.373420  | H | -3.802985 | 2.143241  | 5.158935  |
| C  | -2.275533 | -4.208429 | 2.120150  | C | -4.101998 | 1.828184  | 3.048069  |
| H  | -1.550897 | -4.823286 | 2.648509  | H | -5.000067 | 2.439280  | 3.001036  |
| N  | -2.503679 | 0.409449  | 1.945934  | C | -3.628327 | 1.190123  | 1.904403  |
| C  | -1.859488 | -3.023407 | 1.511141  | C | -4.296844 | 1.251379  | 0.601507  |
| N  | -3.722401 | 0.466399  | -0.345812 | C | -5.433125 | 1.996021  | 0.290982  |
| C  | -0.505581 | -2.526015 | 1.510424  | H | -5.940741 | 2.639225  | 1.006044  |
| N  | -2.445202 | -1.220052 | -1.815549 | C | -5.931996 | 1.900415  | -0.999734 |
| C  | 0.652863  | -2.901440 | 2.169808  | C | -5.356775 | 1.088651  | -1.964674 |
| H  | 0.790917  | -3.723783 | 2.861046  | H | -5.805203 | 1.043533  | -2.954605 |
| N  | 3.521519  | -1.223172 | -1.366129 | C | -4.225263 | 0.358056  | -1.602910 |
| C  | 1.602225  | -1.967544 | 1.740315  | C | -3.517203 | -0.620663 | -2.428854 |
| N  | 4.011884  | 1.254781  | -0.809162 | C | -3.932984 | -1.016790 | -3.695779 |
| C  | 2.991846  | -1.769904 | 2.063797  | H | -4.781636 | -0.529953 | -4.170212 |
| N  | 2.303527  | 1.882386  | 1.069269  | C | -3.276610 | -2.063938 | -4.338497 |

|   |           |           |           |   |           |          |           |
|---|-----------|-----------|-----------|---|-----------|----------|-----------|
| H | -3.597621 | -2.387675 | -5.325792 | C | 3.241203  | 4.063678 | 1.438880  |
| C | -2.233363 | -2.708137 | -3.681507 | H | 3.966187  | 4.828456 | 1.172259  |
| H | -1.719854 | -3.554143 | -4.130080 | C | 2.352298  | 4.281098 | 2.486447  |
| C | -1.851363 | -2.262780 | -2.421042 | H | 2.380830  | 5.213922 | 3.044676  |
| H | -1.047692 | -2.737858 | -1.865989 | C | 1.439611  | 3.281628 | 2.814506  |
| C | 3.272455  | -2.534801 | -1.507864 | H | 0.736319  | 3.407938 | 3.633414  |
| H | 2.432489  | -2.921448 | -0.934195 | C | 1.448894  | 2.102581 | 2.082483  |
| C | 4.026397  | -3.357148 | -2.337182 | H | 0.758019  | 1.287474 | 2.290160  |
| H | 3.789956  | -4.415135 | -2.409838 | O | -1.093955 | 1.435927 | -0.467689 |
| C | 5.076831  | -2.800204 | -3.058766 | H | -1.693807 | 2.074127 | -0.884405 |
| H | 5.683343  | -3.412630 | -3.721638 | H | -0.212444 | 1.571814 | -0.914864 |
| C | 5.353402  | -1.444476 | -2.907884 | H | 1.312712  | 1.831672 | -2.546648 |
| H | 6.181481  | -0.993664 | -3.449051 | O | 1.262938  | 2.115789 | -1.620875 |
| C | 4.576194  | -0.673767 | -2.047415 | H | 1.53014   | 3.076701 | -1.626871 |
| C | 4.840360  | 0.737011  | -1.749761 | H | 2.500632  | 5.020316 | -2.550662 |
| C | 5.854662  | 1.530005  | -2.287579 | O | 2.129348  | 4.711605 | -1.709995 |
| H | 6.528816  | 1.134762  | -3.042979 | H | 1.577472  | 5.451646 | -1.41584  |
| C | 6.001445  | 2.838584  | -1.834608 | H | 6.790557  | 3.466591 | -2.24101  |
| C | 5.153109  | 3.339243  | -0.847883 | O | -7.53266  | 2.578912 | -2.51117  |
| H | 5.279481  | 4.355552  | -0.484310 | O | -7.60618  | 3.39211  | -0.4713   |
| C | 4.150992  | 2.518456  | -0.334120 | N | -7.14179  | 2.700197 | -1.36222  |
| C | 3.212103  | 2.857307  | 0.743112  |   |           |          |           |

### TS-3 A (4+ quartet)

E= -2977.536 04 a.u.

|    |           |           |           |   |           |           |           |
|----|-----------|-----------|-----------|---|-----------|-----------|-----------|
| Ru | -2.007848 | -0.484763 | 0.106727  | C | 3.684091  | -2.434217 | 3.067855  |
| Ru | 2.544683  | 0.140741  | -0.115699 | H | 3.169295  | -3.222257 | 3.612220  |
| N  | -2.767887 | -2.166633 | 0.992918  | C | 5.010560  | -2.133157 | 3.343087  |
| O  | 0.747752  | -1.590895 | -2.260099 | H | 5.556611  | -2.685982 | 4.103426  |
| O  | 0.984912  | -0.409193 | -1.936311 | C | 5.624891  | -1.105712 | 2.629117  |
| C  | -4.068759 | -2.523844 | 0.983764  | H | 6.658834  | -0.826992 | 2.813809  |
| H  | -4.742757 | -1.872096 | 0.432854  | C | 4.902351  | -0.429026 | 1.657416  |
| N  | -0.265093 | -1.392899 | 0.759402  | H | 5.352896  | 0.369369  | 1.074987  |
| C  | -4.529010 | -3.655494 | 1.637200  | C | -1.781470 | 0.443666  | 3.063740  |
| H  | -5.586104 | -3.903986 | 1.599373  | H | -0.933921 | -0.240178 | 3.073038  |
| N  | 1.042156  | -1.068611 | 0.857805  | C | -2.155471 | 1.153455  | 4.198157  |
| C  | -3.619151 | -4.453835 | 2.332623  | H | -1.597552 | 1.025825  | 5.122238  |
| H  | -3.953603 | -5.347023 | 2.854843  | C | -3.258351 | 2.000751  | 4.130119  |
| N  | 3.614123  | -0.720358 | 1.380095  | H | -3.584707 | 2.562129  | 5.002579  |
| C  | -2.279257 | -4.093436 | 2.344420  | C | -3.955313 | 2.103293  | 2.929861  |
| H  | -1.544338 | -4.698738 | 2.869540  | H | -4.832647 | 2.741796  | 2.860748  |
| N  | -2.440693 | 0.548455  | 1.896313  | C | -3.538448 | 1.364186  | 1.825660  |
| C  | -1.867535 | -2.945406 | 1.665099  | C | -4.247706 | 1.343474  | 0.543801  |
| N  | -3.734367 | 0.461370  | -0.351367 | C | -5.370270 | 2.098515  | 0.209949  |
| C  | -0.508323 | -2.470150 | 1.596407  | H | -5.829747 | 2.817267  | 0.884478  |
| N  | -2.553882 | -1.371308 | -1.726283 | C | -5.920114 | 1.911522  | -1.049734 |
| C  | 0.657612  | -2.827639 | 2.249420  | C | -5.407458 | 1.001399  | -1.960370 |
| H  | 0.800675  | -3.619028 | 2.974855  | H | -5.893682 | 0.888093  | -2.926762 |
| N  | 3.526281  | -1.284529 | -1.348131 | C | -4.286206 | 0.265845  | -1.576471 |
| C  | 1.605841  | -1.918630 | 1.767634  | C | -3.634948 | -0.795663 | -2.344536 |
| N  | 4.039281  | 1.208177  | -0.863161 | C | -4.109200 | -1.277696 | -3.560656 |
| C  | 2.996363  | -1.715659 | 2.088462  | H | -4.964898 | -0.807948 | -4.039571 |
| N  | 2.323420  | 1.918332  | 0.976389  | C | -3.501190 | -2.386450 | -4.143523 |



|   |           |           |           |   |           |          |           |
|---|-----------|-----------|-----------|---|-----------|----------|-----------|
| H | -3.866391 | -2.777323 | -5.090380 | C | 3.271436  | 4.107325 | 1.269079  |
| C | -2.445724 | -3.002270 | -3.477756 | H | 4.003515  | 4.856445 | 0.978588  |
| H | -1.965515 | -3.890190 | -3.879795 | C | 2.375307  | 4.371917 | 2.299043  |
| C | -2.005340 | -2.471118 | -2.270985 | H | 2.404452  | 5.326229 | 2.819559  |
| H | -1.187473 | -2.918659 | -1.714081 | C | 1.455157  | 3.390520 | 2.659365  |
| C | 3.262690  | -2.595813 | -1.455731 | H | 0.746121  | 3.551455 | 3.467212  |
| H | 2.415686  | -2.956911 | -0.876073 | C | 1.464553  | 2.183352 | 1.974917  |
| C | 4.009521  | -3.448446 | -2.261267 | H | 0.773194  | 1.377964 | 2.216538  |
| H | 3.759369  | -4.504697 | -2.309034 | O | -1.116160 | 1.346089 | -0.678394 |
| C | 5.071389  | -2.923965 | -2.990285 | H | -1.681179 | 1.873719 | -1.264269 |
| H | 5.673382  | -3.560788 | -3.633943 | H | -0.191263 | 1.465779 | -1.031828 |
| C | 5.364800  | -1.568683 | -2.871629 | H | 1.373519  | 1.720218 | -2.632784 |
| H | 6.202080  | -1.142709 | -3.418708 | O | 1.301809  | 2.031208 | -1.716894 |
| C | 4.591159  | -0.766053 | -2.037229 | H | 1.565231  | 2.992275 | -1.745358 |
| C | 4.867751  | 0.650913  | -1.781554 | H | 2.538548  | 4.904275 | -2.735684 |
| C | 5.891252  | 1.416822  | -2.340996 | O | 2.163142  | 4.625255 | -1.886556 |
| H | 6.565773  | 0.990066  | -3.078662 | H | 1.608298  | 5.374088 | -1.6219   |
| C | 6.046292  | 2.739563  | -1.934503 | H | 6.842642  | 3.346224 | -2.35877  |
| C | 5.195128  | 3.282655  | -0.973112 | O | -7.5556   | 2.513075 | -2.55642  |
| H | 5.325866  | 4.311262  | -0.647648 | O | -7.52192  | 3.503555 | -0.59521  |
| C | 4.184264  | 2.488506  | -0.435644 | N | -7.1164   | 2.720151 | -1.43771  |
| C | 3.239994  | 2.874723  | 0.620500  |   |           |          |           |

### TS-3 B (4+ doublet)

E= -2977.533 13 a.u.

|    |           |           |           |   |           |           |           |
|----|-----------|-----------|-----------|---|-----------|-----------|-----------|
| Ru | -2.669593 | 0.045209  | -0.239330 | C | 2.107902  | -1.949815 | 4.181923  |
| Ru | 1.949791  | -0.300324 | 0.275051  | H | 1.347476  | -2.249686 | 4.898828  |
| N  | -3.885803 | -0.542206 | 1.304874  | C | 3.455639  | -2.094778 | 4.476690  |
| O  | -0.171238 | -1.923399 | -1.552712 | H | 3.770772  | -2.507846 | 5.431774  |
| O  | 0.629840  | -0.966039 | -1.638606 | C | 4.396887  | -1.704287 | 3.523959  |
| C  | -5.233162 | -0.472770 | 1.284942  | H | 5.463484  | -1.798980 | 3.709102  |
| H  | -5.681675 | -0.069134 | 0.380663  | C | 3.960258  | -1.183765 | 2.316201  |
| N  | -1.237377 | -0.621405 | 1.154975  | H | 4.662510  | -0.869103 | 1.549647  |
| C  | -6.011397 | -0.887661 | 2.353500  | C | -2.356043 | 2.618496  | 1.442283  |
| H  | -7.093409 | -0.811258 | 2.290270  | H | -1.735840 | 1.969843  | 2.057442  |
| N  | 0.105501  | -0.734544 | 1.299669  | C | -2.566541 | 3.952691  | 1.760676  |
| C  | -5.384014 | -1.396224 | 3.491633  | H | -2.108528 | 4.376132  | 2.650564  |
| H  | -5.969999 | -1.730143 | 4.344532  | C | -3.392252 | 4.716825  | 0.940265  |
| N  | 2.649853  | -1.034069 | 2.026439  | H | -3.589168 | 5.762032  | 1.167354  |
| C  | -3.998834 | -1.469625 | 3.518439  | C | -3.991809 | 4.115912  | -0.162070 |
| H  | -3.480237 | -1.861727 | 4.389848  | H | -4.663561 | 4.688281  | -0.796843 |
| N  | -2.916539 | 2.036703  | 0.368079  | C | -3.754127 | 2.770349  | -0.429712 |
| C  | -3.263471 | -1.037314 | 2.413000  | C | -4.410371 | 2.015728  | -1.501053 |
| N  | -4.107375 | 0.696118  | -1.497544 | C | -5.310507 | 2.517485  | -2.439994 |
| C  | -1.825015 | -1.066089 | 2.328140  | H | -5.574426 | 3.571718  | -2.451477 |
| N  | -3.268711 | -1.726691 | -1.208250 | C | -5.878193 | 1.645665  | -3.367230 |
| C  | -0.852786 | -1.459919 | 3.229228  | C | -5.551843 | 0.292337  | -3.344556 |
| H  | -0.989352 | -1.850488 | 4.229970  | H | -5.998921 | -0.389951 | -4.062837 |
| N  | 2.623756  | -2.169335 | -0.513991 | C | -4.647302 | -0.169990 | -2.387551 |
| C  | 0.345389  | -1.234861 | 2.550263  | C | -4.206386 | -1.553385 | -2.193722 |
| N  | 3.693758  | 0.182704  | -0.539010 | C | -4.714522 | -2.642809 | -2.896126 |
| C  | 1.717344  | -1.419015 | 2.950464  | H | -5.456083 | -2.491881 | -3.676606 |
| N  | 2.209893  | 1.641728  | 1.046626  | C | -4.286127 | -3.927787 | -2.577555 |

|   |           |           |           |   |           |          |           |
|---|-----------|-----------|-----------|---|-----------|----------|-----------|
| H | -4.683770 | -4.786342 | -3.113622 | C | 3.733636  | 3.504430 | 1.039172  |
| C | -3.357830 | -4.095026 | -1.553371 | H | 4.643750  | 3.968327 | 0.666220  |
| H | -3.010796 | -5.082785 | -1.262881 | C | 2.974448  | 4.144958 | 2.014833  |
| C | -2.875149 | -2.973761 | -0.892272 | H | 3.284469  | 5.113048 | 2.402075  |
| H | -2.139721 | -3.050032 | -0.094501 | C | 1.836080  | 3.509716 | 2.506226  |
| C | 2.068673  | -3.376056 | -0.335825 | H | 1.235235  | 3.960367 | 3.292060  |
| H | 1.152592  | -3.392884 | 0.251697  | C | 1.491639  | 2.264012 | 1.996000  |
| C | 2.614373  | -4.536683 | -0.874613 | H | 0.621690  | 1.716278 | 2.354364  |
| H | 2.134362  | -5.494560 | -0.693677 | O | -1.453330 | 0.789791 | -1.890565 |
| C | 3.775005  | -4.444440 | -1.636516 | H | -1.437116 | 0.169776 | -2.638517 |
| H | 4.224400  | -5.331457 | -2.076395 | H | -0.493455 | 0.995177 | -1.716117 |
| C | 4.365007  | -3.196989 | -1.815974 | H | 1.559628  | 1.508885 | -2.447020 |
| H | 5.282391  | -3.103794 | -2.392222 | O | 1.143583  | 1.522522 | -1.570003 |
| C | 3.781552  | -2.072633 | -1.236319 | H | 1.040873  | 2.481891 | -1.326129 |
| C | 4.369894  | -0.732984 | -1.281607 | H | 0.906204  | 4.681472 | -0.380610 |
| C | 5.538238  | -0.361500 | -1.946995 | O | 0.404544  | 4.046162 | -0.911671 |
| H | 6.114640  | -1.046707 | -2.564247 | H | 0.11619   | 4.562934 | -1.67996  |
| C | 5.973621  | 0.945666  | -1.802116 | H | -6.58216  | 2.021851 | -4.1056   |
| C | 5.308260  | 1.870047  | -1.007978 | O | 7.539373  | 2.541169 | -2.35559  |
| H | 5.717272  | 2.873334  | -0.915980 | O | 7.767824  | 0.51889  | -3.18215  |
| C | 4.146378  | 1.454182  | -0.364775 | N | 7.212994  | 1.375304 | -2.51396  |
| C | 3.346982  | 2.248257  | 0.575446  |   |           |          |           |

### TS-3 B (4+ quartet)

E= -2977.532 85 a.u.

|    |           |           |           |   |           |           |           |
|----|-----------|-----------|-----------|---|-----------|-----------|-----------|
| Ru | -2.670169 | 0.040632  | -0.238197 | C | 2.108685  | -1.828163 | 4.233445  |
| Ru | 1.958480  | -0.278839 | 0.285718  | H | 1.346821  | -2.130223 | 4.947907  |
| N  | -3.886227 | -0.576282 | 1.294549  | C | 3.455968  | -1.929339 | 4.549950  |
| O  | -0.100764 | -2.020378 | -1.559763 | H | 3.768470  | -2.312678 | 5.518190  |
| O  | 0.597052  | -0.984802 | -1.625002 | C | 4.399151  | -1.532515 | 3.602553  |
| C  | -5.234458 | -0.528762 | 1.266892  | H | 5.465278  | -1.594429 | 3.803580  |
| H  | -5.684269 | -0.127291 | 0.362273  | C | 3.965111  | -1.051876 | 2.376850  |
| N  | -1.234871 | -0.620401 | 1.155057  | H | 4.669282  | -0.736998 | 1.612100  |
| C  | -6.011765 | -0.962070 | 2.328656  | C | -2.407455 | 2.597979  | 1.474337  |
| H  | -7.094515 | -0.903017 | 2.259769  | H | -1.784931 | 1.950231  | 2.088319  |
| N  | 0.110195  | -0.701291 | 1.312822  | C | -2.636154 | 3.926433  | 1.804295  |
| C  | -5.382354 | -1.466374 | 3.467701  | H | -2.191271 | 4.345849  | 2.702801  |
| H  | -5.967574 | -1.814313 | 4.315512  | C | -3.463946 | 4.689180  | 0.984523  |
| N  | 2.655884  | -0.949668 | 2.064383  | H | -3.674979 | 5.729654  | 1.220594  |
| C  | -3.996397 | -1.517592 | 3.502069  | C | -4.047741 | 4.092601  | -0.128664 |
| H  | -3.476467 | -1.906309 | 4.374194  | H | -4.721335 | 4.663451  | -0.762879 |
| N  | -2.951692 | 2.021450  | 0.389016  | C | -3.791746 | 2.752809  | -0.407905 |
| C  | -3.261772 | -1.067541 | 2.403137  | C | -4.430488 | 2.000452  | -1.491426 |
| N  | -4.109323 | 0.685125  | -1.498922 | C | -5.331803 | 2.498851  | -2.431011 |
| C  | -1.822649 | -1.071526 | 2.326663  | H | -5.610528 | 3.549350  | -2.433717 |
| N  | -3.243525 | -1.729120 | -1.223249 | C | -5.881974 | 1.628186  | -3.369961 |
| C  | -0.849691 | -1.436907 | 3.238008  | C | -5.537792 | 0.279110  | -3.357906 |
| H  | -0.985843 | -1.822791 | 4.240631  | H | -5.972033 | -0.402431 | -4.084750 |
| N  | 2.619081  | -2.168998 | -0.446694 | C | -4.632810 | -0.180128 | -2.399752 |
| C  | 0.349370  | -1.188041 | 2.567838  | C | -4.176255 | -1.559608 | -2.214204 |
| N  | 3.703072  | 0.175670  | -0.539657 | C | -4.666005 | -2.650126 | -2.927676 |
| C  | 1.721506  | -1.336289 | 2.985247  | H | -5.403865 | -2.503055 | -3.712402 |
| N  | 2.216930  | 1.692252  | 0.986837  | C | -4.224080 | -3.932029 | -2.614515 |

|   |           |           |           |   |           |          |           |
|---|-----------|-----------|-----------|---|-----------|----------|-----------|
| H | -4.607357 | -4.791626 | -3.159325 | C | 3.746725  | 3.549234 | 0.923248  |
| C | -3.301960 | -4.095453 | -1.584179 | H | 4.661314  | 3.996319 | 0.540939  |
| H | -2.945574 | -5.081042 | -1.297713 | C | 2.980116  | 4.228986 | 1.865690  |
| C | -2.838146 | -2.973132 | -0.911312 | H | 3.289551  | 5.210277 | 2.218544  |
| H | -2.107725 | -3.045887 | -0.108589 | C | 1.833621  | 3.617316 | 2.367844  |
| C | 2.059508  | -3.368300 | -0.233410 | H | 1.225168  | 4.100286 | 3.128275  |
| H | 1.143794  | -3.364872 | 0.354592  | C | 1.490423  | 2.353678 | 1.902368  |
| C | 2.601138  | -4.547001 | -0.736067 | H | 0.613854  | 1.823496 | 2.270561  |
| H | 2.117507  | -5.497039 | -0.525847 | O | -1.450434 | 0.800865 | -1.876937 |
| C | 3.762438  | -4.482644 | -1.499206 | H | -1.454164 | 0.200246 | -2.640814 |
| H | 4.208760  | -5.384261 | -1.911689 | H | -0.483572 | 0.986460 | -1.715007 |
| C | 4.358124  | -3.243377 | -1.714622 | H | 1.561978  | 1.475690 | -2.502926 |
| H | 5.276733  | -3.171207 | -2.291903 | O | 1.156366  | 1.498295 | -1.621358 |
| C | 3.779426  | -2.099999 | -1.169294 | H | 1.034852  | 2.458227 | -1.393329 |
| C | 4.375142  | -0.765410 | -1.253633 | H | 0.737254  | 4.663536 | -0.456989 |
| C | 5.545627  | -0.419862 | -1.928884 | O | 0.296166  | 3.990685 | -0.995477 |
| H | 6.119608  | -1.125965 | -2.524479 | H | 0.000177  | 4.47957  | -1.77901  |
| C | 5.987038  | 0.889173  | -1.823782 | H | -6.58676  | 2.001806 | -4.10887  |
| C | 5.324710  | 1.840962  | -1.060270 | O | 7.559403  | 2.45996  | -2.42669  |
| H | 5.737253  | 2.845218  | -1.000322 | O | 7.781515  | 0.410997 | -3.18638  |
| C | 4.160277  | 1.450274  | -0.405901 | N | 7.228791  | 1.29075  | -2.54728  |
| C | 3.359471  | 2.278091  | 0.503212  |   |           |          |           |

- [1] F. Bozoglian, S. Romain, M. Z. Ertem, T. K. Todorova, C. Sens, J. Mola, M. Rodriguez, I. Romero, J. Benet-Buchholz, X. Fontrodona, C. J. Cramer, L. Gagliardi, A. Llobet, *J. Am. Chem. Soc.* **2009**, *131*, 15176-15187.
